# Supplementary material for: Circular RNA hsa_circRNA_0007334 is Predicted to Promote MMP7 and COL1A1 Expression by Functioning as a miRNA Sponge in Pancreatic Ductal Adenocarcinoma
Source: Hindawi journal article supplement (doi:10.1155/2019/7630894), 2019-07-24

Circular RNA hsa\_circRNA\_0007334 is Predicted to Promote MMP7 and COL1A1 Expression by Functioning as miRNA Sponge in Pancreatic Ductal Adenocarcinoma

Jinghui Yang<sup>1</sup>, Xianling Cong<sup>3</sup>, Ming Ren<sup>4</sup>, Hongyan Sun<sup>3</sup>, Tao Liu<sup>5</sup>, Gaoyang Chen<sup>4</sup>, Qingyu Wang<sup>4</sup>, Zhaoyan Li<sup>4</sup>, Shan Yu<sup>2\*</sup>, Qiwei Yang<sup>4,6\*</sup>

| Reads' Mapping                             |                   |                   |                   |                   |                   |                   |                   |                   |                   |                   |
|--------------------------------------------|-------------------|-------------------|-------------------|-------------------|-------------------|-------------------|-------------------|-------------------|-------------------|-------------------|
| Sample name                                | T1                | T2                | T3                | T4                | T5                | N1                | N2                | N3                | N4                | N5                |
| Total reads                                | 65459710          | 73486532          | 67158268          | 55900776          | 62333044          | 55590510          | 83180310          | 68719040          | 67928714          | 55385732          |
| Total mapped                               | 59316900 (90.62%) | 66826568 (90.94%) | 57373700 (85.43%) | 49960555 (89.37%) | 54491826 (87.42%) | 51489537 (92.62%) | 76606797 (92.1%)  | 59151794 (86.08%) | 61192081 (90.08%) | 51014081 (92.11%) |
| Multiple mapped                            | 5607957 (8.57%)   | 5647470 (7.69%)   | 5348820 (7.96%)   | 5194563 (9.29%)   | 5164715 (8.29%)   | 4855697 (8.73%)   | 7184264 (8.64%)   | 7128627 (10.37%)  | 8821875 (12.99%)  | 4139852 (7.47%)   |
| Uniquely mapped                            | 53708943 (82.05%) | 61179098 (83.25%) | 52024880 (77.47%) | 44765992 (80.08%) | 49327111 (79.13%) | 46633840 (83.89%) | 69422533 (83.46%) | 52023167 (75.7%)  | 52370206 (77.1%)  | 46874229 (84.63%) |
| Read-1                                     | 27582550 (42.14%) | 31344483 (42.65%) | 26806585 (39.92%) | 22911223 (40.99%) | 25416915 (40.78%) | 23861332 (42.92%) | 35601818 (42.8%)  | 27003106 (39.29%) | 26796743 (39.45%) | 24084039 (43.48%) |
| Read-2                                     | 26126393 (39.91%) | 29834615 (40.6%)  | 25218295 (37.55%) | 21854769 (39.1%)  | 23910196 (38.36%) | 22772508 (40.96%) | 33820715 (40.66%) | 25020061 (36.41%) | 25573463 (37.65%) | 22790190 (41.15%) |
| Reads map to '+'                           | 27049064 (41.32%) | 30931750 (42.09%) | 26239351 (39.07%) | 22578850 (40.39%) | 24929924 (39.99%) | 23561941 (42.38%) | 35099420 (42.2%)  | 26505766 (38.57%) | 26407159 (38.87%) | 23732793 (42.85%) |
| Reads map to '-'                           | 26659879 (40.73%) | 30247348 (41.16%) | 25785529 (38.4%)  | 22187142 (39.69%) | 24397187 (39.14%) | 23071899 (41.5%)  | 34323113 (41.26%) | 25517401 (37.13%) | 25963047 (38.22%) | 23141436 (41.78%) |
| Non-splice reads                           | 51892094 (79.27%) | 59148927 (80.49%) | 49325975 (73.45%) | 43065778 (77.04%) | 47297714 (75.88%) | 45862802 (82.5%)  | 68279190 (82.09%) | 50594745 (73.63%) | 51632914 (76.01%) | 45763995 (82.63%) |
| Splice reads                               | 1816849 (2.78%)   | 2030171 (2.76%)   | 2698905 (4.02%)   | 1700214 (3.04%)   | 2029397 (3.26%)   | 771038 (1.39%)    | 1143343 (1.37%)   | 1428422 (2.08%)   | 737292 (1.09%)    | 1110234 (2%)      |
| Reads mapped in proper pairs               | 51272680 (78.33%) | 58551796 (79.68%) | 49419838 (73.59%) | 42988366 (76.9%)  | 46976936 (75.36%) | 44449828 (79.96%) | 65375240 (78.59%) | 49423140 (71.92%) | 50409928 (74.21%) | 44250084 (79.89%) |
| Proper-paired reads map to different chrom | 2 (0%)            | 0 (0%)            | 2 (0%)            | 8 (0%)            | 2 (0%)            | 0 (0%)            | 0 (0%)            | 0 (0%)            | 0 (0%)            | 2 (0%)            |
| Quality Filtering                          |                   |                   |                   |                   |                   |                   |                   |                   |                   |                   |
| Sample name                                | T1                | T2                | T3                | T4                | T5                | N1                | N2                | N3                | N4                | N5                |
| Clean Reads                                | 32729855 (93.37%) | 36743266 (93.52%) | 33579134 (86.26%) | 27950388 (89.19%) | 31166522 (85.76%) | 27795255 (95.14%) | 41590155 (96.12%) | 34359520 (87.72%) | 33964357 (87.70%) | 27692866 (96.03%) |
| Containing N                               | 403960 (1.15%)    | 456449 (1.16%)    | 598427 (1.54%)    | 414751 (1.32%)    | 228050 (0.63%)    | 512183 (1.75%)    | 477672 (1.10%)    | 398934 (1.02%)    | 266829 (0.69%)    | 502797 (1.74%)    |
| Low Quality                                | 0.1 (0.00%)       | 0.1 (0.00%)       | 0.1 (0.00%)       | 0.1 (0.00%)       | 0.1 (0.00%)       | 0.1 (0.00%)       | 0.1 (0.00%)       | 0.1 (0.00%)       | 0.1 (0.00%)       | 0.1 (0.00%)       |
| Adapter Related                            | 1921264 (5.48%)   | 2090157 (5.32%)   | 4752140 (12.21%)  | 2973079 (9.49%)   | 4948847 (13.62%)  | 907721 (3.11%)    | 1201001 (2.78%)   | 4411429 (11.26%)  | 4497436 (11.61%)  | 642428 (2.23%)    |

Normalization of Data

Normalization value =

Read Count \* 1,000,000

$\sum_{i=1}^n \text{circRNA readcount}$

# Circular RNA hsa\_circRNA\_0007334 is Predicted to Promote MMP7 and COL1A1 Expression by Functioning as miRNA Sponge in Pancreatic Ductal Adenocarcinoma

Jinghui Yang<sup>1</sup>, Xianling Cong<sup>3</sup>, Ming Ren<sup>4</sup>, Hongyan Sun<sup>3</sup>, Tao Liu<sup>5</sup>, Gaoyang Chen<sup>4</sup>, Qingyu Wang<sup>4</sup>, Zhaoyan Li<sup>4</sup>, Shan Yu<sup>2\*</sup>, Qiwei Yang<sup>4,6\*</sup>

| Annotations       |            | Fold change and Regulation |            | P-value and P-adj |           |
|-------------------|------------|----------------------------|------------|-------------------|-----------|
| circRNA ID        | GeneSymbol | FC (abs)                   | Regulation | P-val             | P-adj     |
| hsa_circ_0056856  | ITGB6      | 8.0341                     | up         | 2.91E-07          | 5.13E-05  |
| hsa_circ_0049792  | EMR2       | 6.7007                     | up         | 2.02E-05          | 0.0014822 |
| hsa_circ_0000692  | ITGAM      | 6.6262                     | up         | 2.65E-05          | 0.0017553 |
| hsa_circ_0008599  | MIR31HG    | 6.6075                     | up         | 0.00015567        | 0.0064513 |
| hsa_circ_0005320  | SEPT9      | 6.575                      | up         | 3.32E-05          | 0.0020075 |
| hsa_circ_0075829  | LINC00340  | 6.3798                     | up         | 7.06E-05          | 0.0035536 |
| hsa_circ_0001277  | SLC4A7     | 6.3215                     | up         | 7.66E-05          | 0.003766  |
| hg38_circ_0007301 |            | 6.2788                     | up         | 0.0001115         | 0.005014  |
| hsa_circ_0081343  | ARPC1B     | 6.1535                     | up         | 0.00014957        | 0.0064181 |
| hsa_circ_0005311  | TRIO       | 6.1257                     | up         | 0.00016683        | 0.0067806 |
| hg38_circ_0004289 |            | 6.1225                     | up         | 0.00015183        | 0.0064181 |
| hsa_circ_0006973  | PDZRN3     | 6.1045                     | up         | 0.00016489        | 0.0067669 |
| hsa_circ_0004032  | ATXN1      | 6.104                      | up         | 0.00020913        | 0.0074284 |
| hsa_circ_0004300  | ANP32E     | 6.064                      | up         | 0.00018224        | 0.0071438 |
| hg38_circ_0015943 |            | 6.0525                     | up         | 0.00019169        | 0.0071877 |
| hsa_circ_0000682  | PRKCB      | 6.0458                     | up         | 0.00019974        | 0.0072163 |
| hsa_circ_0002882  | AXL        | 6.0266                     | up         | 0.00026468        | 0.0086728 |
| hsa_circ_0005085  | ASAP2      | 5.9524                     | up         | 0.00037515        | 0.010546  |
| hsa_circ_0052099  | ZNF880     | 5.9336                     | up         | 0.00026052        | 0.0086728 |
| hsa_circ_0018087  | ZEB1       | 5.9101                     | up         | 0.00028173        | 0.0089538 |
| hg38_circ_0007606 |            | 5.894                      | up         | 0.00029697        | 0.0091432 |
| hg38_circ_0008704 |            | 5.8622                     | up         | 0.00036658        | 0.010469  |
| hsa_circ_0005734  | FAM53B     | 5.8221                     | up         | 0.000408          | 0.011199  |
| hg38_circ_0007186 |            | 5.7719                     | up         | 0.00064168        | 0.016049  |
| hg38_circ_0007297 |            | 5.7302                     | up         | 0.00053996        | 0.013917  |
| hsa_circ_0039158  | ITGAM      | 5.6933                     | up         | 0.00060968        | 0.01534   |
| hsa_circ_0008063  | UBE2J2     | 5.6828                     | up         | 0.0005888         | 0.014924  |
| hg38_circ_0014522 |            | 5.6578                     | up         | 0.00082033        | 0.019481  |
| hsa_circ_0017636  | SFMBT2     | 5.6342                     | up         | 0.00066586        | 0.016556  |
| hsa_circ_0089974  | NHS        | 5.6168                     | up         | 0.00070478        | 0.01722   |
| hg38_circ_0018384 |            | 5.5107                     | up         | 0.00095499        | 0.021944  |
| hsa_circ_0036988  | CHD2       | 5.4987                     | up         | 0.0013177         | 0.026398  |
| hg38_circ_0014949 |            | 5.4983                     | up         | 0.0012711         | 0.02621   |
| hsa_circ_0006482  | CBFB       | 5.4939                     | up         | 0.00098432        | 0.02249   |
| hg38_circ_0020621 |            | 5.4756                     | up         | 0.0012439         | 0.02603   |
| hsa_circ_0023988  | NOX4       | 5.4639                     | up         | 0.0010605         | 0.023593  |
| hsa_circ_0004142  | ALKBH5     | 5.4555                     | up         | 0.0011053         | 0.024335  |
| hsa_circ_0005211  | MYO1E      | 5.4518                     | up         | 0.001305          | 0.026398  |
| hsa_circ_0031569  | HEATR5A    | 5.4411                     | up         | 0.0013079         | 0.026398  |
| hsa_circ_0064460  | NR2C2      | 5.4291                     | up         | 0.0011454         | 0.025086  |
| hsa_circ_0002015  | MMD        | 5.4217                     | up         | 0.0011744         | 0.02542   |
| hg38_circ_0008591 |            | 5.3445                     | up         | 0.0014584         | 0.028022  |
| hg38_circ_0011267 |            | 5.3314                     | up         | 0.0015713         | 0.029069  |
| hsa_circ_0003271  | AXL        | 5.3302                     | up         | 0.00157           | 0.029069  |
| hsa_circ_0006051  | LRP5L      | 5.3302                     | up         | 0.0016402         | 0.029757  |
| hsa_circ_0001240  | NFAM1      | 5.3294                     | up         | 0.0016885         | 0.030243  |
| hsa_circ_0003563  | RUNX2      | 5.3137                     | up         | 0.0018751         | 0.032219  |
| hsa_circ_0032689  | FLVCR2     | 5.3126                     | up         | 0.0015562         | 0.029069  |
| hsa_circ_0057867  | NBEAL1     | 5.3106                     | up         | 0.0015596         | 0.029069  |
| hsa_circ_0002111  | PSD3       | 5.2822                     | up         | 0.0017109         | 0.030259  |

|                   |                |           |            |            |
|-------------------|----------------|-----------|------------|------------|
| hsa_circ_0023555  | C2CD3          | 5.2793 up | 0.0020778  | 0.034716   |
| hsa_circ_0008537  | GLI3           | 5.2649 up | 0.0019365  | 0.033007   |
| hsa_circ_0002247  | LTBP1          | 5.2602 up | 0.0018394  | 0.031866   |
| hg38_circ_0023450 |                | 5.2574 up | 0.0021962  | 0.035568   |
| hsa_circ_0006708  | IRAK3          | 5.2457 up | 0.0023183  | 0.036567   |
| hsa_circ_0008223  | XPO6           | 5.241 up  | 0.0019294  | 0.033007   |
| hsa_circ_0087232  | PCSK5          | 5.2046 up | 0.0021174  | 0.034732   |
| hsa_circ_0008432  | TPM4           | 5.1952 up | 0.0028869  | 0.042321   |
| hsa_circ_0062649  | ADRBK2         | 5.1881 up | 0.0022868  | 0.03634    |
| hsa_circ_0005687  | CRISPLD2       | 5.1879 up | 0.0021409  | 0.03494    |
| hsa_circ_0006358  | PALLD          | 5.1788 up | 0.0023184  | 0.036567   |
| hsa_circ_0000906  | TMEM38A        | 5.1771 up | 0.0027281  | 0.041038   |
| hsa_circ_0051123  | LTBP4          | 5.1632 up | 0.0026832  | 0.040653   |
| hsa_circ_0006569  | PTPN9          | 5.1423 up | 0.0025918  | 0.039774   |
| hsa_circ_0004365  | SEMA3C         | 5.1243 up | 0.0026041  | 0.039774   |
| hsa_circ_0007733  | DOCK11         | 5.1169 up | 0.0030168  | 0.043671   |
| hsa_circ_0049487  | CNN1           | 5.1139 up | 0.0028842  | 0.042321   |
| hsa_circ_0001252  | TBC1D22A       | 5.1093 up | 0.0031691  | 0.044872   |
| hsa_circ_0079668  | TAX1BP1        | 5.1076 up | 0.0027092  | 0.040899   |
| hsa_circ_0073396  | MCTP1          | 5.101 up  | 0.0031741  | 0.044872   |
| hg38_circ_0027589 |                | 5.0908 up | 0.0028174  | 0.041939   |
| hg38_circ_0010763 |                | 5.0865 up | 0.0028177  | 0.041939   |
| hsa_circ_0007843  | ARHGAP32       | 5.0798 up | 0.0028345  | 0.04204    |
| hg38_circ_0021801 |                | 5.0789 up | 0.0035142  | 0.047307   |
| hsa_circ_0003449  | MEIS3          | 5.0778 up | 0.002926   | 0.04265    |
| hsa_circ_0056664  | GTDC1          | 5.0605 up | 0.0030657  | 0.04379    |
| hg38_circ_0002385 |                | 5.0493 up | 0.003514   | 0.047307   |
| hsa_circ_0001115  | DGKD           | 5.0459 up | 0.0030588  | 0.04379    |
| hsa_circ_0058773  | DGKD           | 5.0444 up | 0.0036625  | 0.048531   |
| hsa_circ_0032457  | PCNX           | 5.0429 up | 0.0037744  | 0.049394   |
| hg38_circ_0022002 |                | 5.0423 up | 0.0033326  | 0.046338   |
| hsa_circ_0069052  | EVC2           | 4.9843 up | 0.0037556  | 0.049301   |
| hsa_circ_0000450  | RHOF           | 4.6007 up | 3.52E-08   | 9.91E-06   |
| hsa_circ_0004968  | DCBLD2         | 4.5611 up | 8.94E-05   | 0.0042453  |
| hsa_circ_0007210  | TCONS_I2_00019 | 4.5393 up | 7.45E-06   | 0.00066336 |
| hsa_circ_0003380  | ZFPM2          | 4.449 up  | 1.17E-07   | 2.75E-05   |
| hsa_circ_0000939  | APOC1          | 4.394 up  | 1.86E-07   | 3.58E-05   |
| hsa_circ_0075828  | LINC00340      | 4.2866 up | 1.99E-09   | 1.40E-06   |
| hg38_circ_0007554 |                | 4.2575 up | 3.52E-06   | 0.00040135 |
| hsa_circ_0007334  | MBOAT2         | 4.1784 up | 3.41E-09   | 2.06E-06   |
| hsa_circ_0007904  | HDAC9          | 4.1741 up | 0.0001834  | 0.0071438  |
| hsa_circ_0004650  | None           | 4.1054 up | 9.72E-06   | 0.00080543 |
| hsa_circ_0006836  | CLEC16A        | 4.0974 up | 0.0002963  | 0.0091432  |
| hsa_circ_0009142  | CAP1           | 4.0947 up | 4.29E-05   | 0.002485   |
| hsa_circ_0000431  | DRAM1          | 4.0869 up | 0.00011584 | 0.0051541  |
| hsa_circ_0002873  | CREBL2         | 4.0841 up | 0.00036902 | 0.010469   |
| hg38_circ_0025574 |                | 4.0693 up | 6.61E-06   | 0.00062046 |
| hsa_circ_0002360  | RUNX1          | 4.0054 up | 6.71E-05   | 0.0034412  |
| hsa_circ_0005019  | CHSY1          | 3.9988 up | 1.62E-07   | 3.43E-05   |
| hsa_circ_0004092  | MB21D1         | 3.9078 up | 1.50E-05   | 0.0011285  |
| hg38_circ_0000996 |                | 3.884 up  | 0.00026312 | 0.0086728  |
| hsa_circ_0007439  | PPP1CB         | 3.858 up  | 0.00039239 | 0.010912   |
| hsa_circ_0008844  | MFSD2A         | 3.8047 up | 0.0017819  | 0.031254   |
| hsa_circ_0039161  | ITGAX          | 3.7469 up | 0.00036861 | 0.010469   |
| hsa_circ_0052877  | C2orf43        | 3.7184 up | 0.0014663  | 0.028046   |
| hsa_circ_0003267  | ME1            | 3.7141 up | 0.00073087 | 0.017553   |
| hsa_circ_0008264  | NAV1           | 3.6842 up | 0.0018159  | 0.031719   |
| hsa_circ_0033144  | BCL11B         | 3.6012 up | 7.04E-06   | 0.00064724 |

|                   |               |           |            |            |
|-------------------|---------------|-----------|------------|------------|
| hg38_circ_0004316 |               | 3.5919 up | 0.00019348 | 0.0071877  |
| hsa_circ_0005317  | TRPM4         | 3.5351 up | 0.0027491  | 0.041208   |
| hsa_circ_0004891  | CNN2          | 3.5342 up | 1.23E-08   | 4.01E-06   |
| hsa_circ_0002194  | RELL1         | 3.4956 up | 0.00032853 | 0.0096436  |
| hsa_circ_0009125  | HABP4         | 3.4824 up | 0.0035981  | 0.047979   |
| hsa_circ_0000230  | ZEB1          | 3.4704 up | 2.77E-05   | 0.0017553  |
| hsa_circ_0069152  | AFAP1         | 3.3702 up | 1.81E-07   | 3.58E-05   |
| hsa_circ_0000707  | CBFB          | 3.3602 up | 0.00019324 | 0.0071877  |
| hsa_circ_0005620  | SH3PXD2A      | 3.3422 up | 1.44E-06   | 0.00019015 |
| hsa_circ_0031113  | TEP1          | 3.3401 up | 0.0022732  | 0.036328   |
| hsa_circ_0008590  | RELB          | 3.3269 up | 3.61E-06   | 0.00040135 |
| hsa_circ_0005230  | DNM3OS        | 3.2707 up | 4.51E-05   | 0.0025445  |
| hsa_circ_0007940  | ARPC1B        | 3.2571 up | 0.0020962  | 0.034732   |
| hsa_circ_0000972  | MBOAT2        | 3.2064 up | 4.55E-08   | 1.20E-05   |
| hsa_circ_0005898  | MYOF          | 3.1994 up | 0.00019385 | 0.0071877  |
| hsa_circ_0006692  | TCONS_0002553 | 3.1955 up | 0.00013532 | 0.005897   |
| hsa_circ_0002075  | BMP1          | 3.1686 up | 4.70E-05   | 0.002614   |
| hg38_circ_0004299 |               | 3.1187 up | 9.59E-07   | 0.00013517 |
| hsa_circ_0005358  | GLI1          | 3.0609 up | 0.0012142  | 0.025703   |
| hsa_circ_0039076  | SRCAP         | 3.054 up  | 0.0015032  | 0.028621   |
| hg38_circ_0004278 |               | 3.0414 up | 0.00026893 | 0.0086777  |
| hsa_circ_0006608  | PFKP          | 2.9926 up | 0.0012141  | 0.025703   |
| hsa_circ_0002837  | TGFB1         | 2.9874 up | 0.00023059 | 0.0079264  |
| hsa_circ_0007731  | MYO9B         | 2.9729 up | 0.0010908  | 0.02414    |
| hsa_circ_0008615  | PPP1R13L      | 2.9134 up | 0.00044618 | 0.011862   |
| hsa_circ_0002130  | C3            | 2.9109 up | 0.00032489 | 0.0096412  |
| hsa_circ_0087938  | C9orf5        | 2.8982 up | 0.0034934  | 0.047307   |
| hsa_circ_0003071  | SPATS2L       | 2.8619 up | 3.36E-06   | 0.0003945  |
| hsa_circ_0005571  | IFI30         | 2.854 up  | 0.0003957  | 0.010932   |
| hsa_circ_0005175  | HPS4          | 2.8407 up | 3.71E-05   | 0.0022072  |
| hsa_circ_0006877  | LDLR          | 2.8375 up | 0.00010733 | 0.0049312  |
| hsa_circ_0004954  | PITPNA        | 2.7625 up | 0.0022145  | 0.035727   |
| hg38_circ_0007562 |               | 2.7533 up | 0.001016   | 0.02273    |
| hsa_circ_0004228  | EVC2          | 2.7471 up | 6.76E-05   | 0.0034412  |
| hsa_circ_0000375  | IFFO1         | 2.7356 up | 5.70E-06   | 0.00057134 |
| hsa_circ_0050334  | URI1          | 2.7105 up | 0.0028584  | 0.042246   |
| hsa_circ_0000732  | SCARF1        | 2.6791 up | 1.26E-05   | 0.00096762 |
| hsa_circ_0004458  | PSD3          | 2.6614 up | 0.0035685  | 0.047861   |
| hsa_circ_0051680  | DHX34         | 2.6396 up | 7.53E-06   | 0.00066336 |
| hsa_circ_0002532  | TCONS_0001718 | 2.6382 up | 0.00029655 | 0.0091432  |
| hsa_circ_0002878  | FBLN1         | 2.627 up  | 0.0026064  | 0.039774   |
| hsa_circ_0008833  | SAMD3         | 2.6131 up | 0.00033541 | 0.0097779  |
| hsa_circ_0000130  | SNX27         | 2.6053 up | 0.0016121  | 0.0295     |
| hsa_circ_0001821  | TCONS_0001535 | 2.6009 up | 0.00024981 | 0.0084474  |
| hsa_circ_0001721  | CDK14         | 2.5473 up | 4.96E-05   | 0.0026878  |
| hsa_circ_0000437  | CORO1C        | 2.4894 up | 2.78E-13   | 5.88E-10   |
| hsa_circ_0008521  | PSEN1         | 2.4315 up | 1.02E-08   | 3.94E-06   |
| hg38_circ_0014462 |               | 2.4156 up | 0.0002985  | 0.0091432  |
| hsa_circ_0000690  | ITGAL         | 2.3983 up | 7.22E-07   | 0.00010898 |
| hsa_circ_0008732  | BNC2          | 2.3945 up | 5.87E-07   | 9.92E-05   |
| hsa_circ_0000228  | ZEB1          | 2.385 up  | 7.39E-05   | 0.0036732  |
| hsa_circ_0000688  | MVP           | 2.3754 up | 1.02E-08   | 3.94E-06   |
| hsa_circ_0000446  | TAOK3         | 2.3735 up | 0.0010071  | 0.02273    |
| hsa_circ_0008934  | ASAP1         | 2.3226 up | 0.00018591 | 0.0071438  |
| hsa_circ_0074371  | ARHGAP26      | 2.2921 up | 2.70E-06   | 0.00033505 |
| hg38_circ_0014786 |               | 2.2702 up | 0.0002685  | 0.0086777  |
| hsa_circ_0008016  | FGFR1         | 2.235 up  | 2.78E-05   | 0.0017553  |
| hsa_circ_0004476  | ASXL2         | 2.2151 up | 0.0020986  | 0.034732   |

|                   |               |              |            |            |
|-------------------|---------------|--------------|------------|------------|
| hsa_circ_0003848  | PSEN1         | 2.193 up     | 4.44E-05   | 0.0025365  |
| hsa_circ_0000362  | CBL           | 2.1725 up    | 0.0014264  | 0.027786   |
| hsa_circ_0008194  | AHNAK         | 2.1568 up    | 0.0017061  | 0.030259   |
| hsa_circ_0000211  | SFMBT2        | 2.1235 up    | 0.00026371 | 0.0086728  |
| hg38_circ_0005277 |               | 2.1152 up    | 0.0031918  | 0.044927   |
| hsa_circ_0085616  | ASAP1         | 2.0958 up    | 2.71E-05   | 0.0017553  |
| hsa_circ_0000754  | SSH2          | 2.0734 up    | 0.0022775  | 0.036328   |
| hsa_circ_0027440  | TBC1D30       | -2.1423 down | 0.00019763 | 0.0072015  |
| hsa_circ_0048965  | INSR          | -2.2209 down | 0.00027598 | 0.0088375  |
| hsa_circ_0001766  | PDIA4         | -2.2511 down | 2.70E-05   | 0.0017553  |
| hsa_circ_0001786  | DCTN6         | -2.2654 down | 0.0032958  | 0.045978   |
| hsa_circ_0021516  | GAS2          | -2.3044 down | 0.00047697 | 0.012601   |
| hg38_circ_0019004 |               | -2.3339 down | 0.0013939  | 0.027405   |
| hsa_circ_0002472  | PLXNA2        | -2.3696 down | 0.00084772 | 0.020019   |
| hsa_circ_0005204  | SLC43A1       | -2.4017 down | 2.83E-10   | 3.59E-07   |
| hsa_circ_0044646  | SPAG9         | -2.4098 down | 0.00022351 | 0.0078082  |
| hsa_circ_0004913  | TEX2          | -2.413 down  | 0.00053024 | 0.013818   |
| hg38_circ_0000339 |               | -2.4443 down | 0.00010664 | 0.0049312  |
| hsa_circ_0002562  | TCONS_0001474 | -2.4459 down | 0.00072939 | 0.017553   |
| hsa_circ_0070440  | FAM13A        | -2.6008 down | 0.00015406 | 0.0064478  |
| hg38_circ_0005953 |               | -2.6194 down | 3.40E-10   | 3.59E-07   |
| hsa_circ_0001566  | MAPK9         | -2.6608 down | 7.78E-06   | 0.00067149 |
| hsa_circ_0004844  | ARSE          | -2.6632 down | 0.00042137 | 0.011345   |
| hsa_circ_0040188  | AARS          | -2.7272 down | 0.0001739  | 0.0069348  |
| hsa_circ_0069922  | SLC4A4        | -2.8131 down | 0.0013153  | 0.026398   |
| hg38_circ_0019734 |               | -2.8233 down | 0.00092373 | 0.021454   |
| hsa_circ_0004587  | TMEM181       | -2.8674 down | 0.0015176  | 0.028705   |
| hg38_circ_0026403 |               | -2.8829 down | 0.0015212  | 0.028705   |
| hg38_circ_0022683 |               | -2.8983 down | 0.00041651 | 0.011286   |
| hsa_circ_0004238  | PTK2          | -2.9896 down | 0.00095523 | 0.021944   |
| hsa_circ_0007513  | GCAT          | -3.0543 down | 1.08E-07   | 2.68E-05   |
| hsa_circ_0006374  | ARCN1         | -3.0637 down | 0.00058962 | 0.014924   |
| hsa_circ_0008676  | SLC4A4        | -3.1403 down | 0.0021821  | 0.035477   |
| hsa_circ_0009133  | MFSD8         | -3.1515 down | 0.0016033  | 0.029466   |
| hg38_circ_0024874 |               | -3.1755 down | 3.07E-05   | 0.0019058  |
| hsa_circ_0005115  | SEC63         | -3.4096 down | 0.0033506  | 0.046436   |
| hg38_circ_0024699 |               | -3.4752 down | 1.14E-08   | 4.01E-06   |
| hsa_circ_0015816  | NR5A2         | -3.6649 down | 0.00011019 | 0.0050083  |
| hg38_circ_0018658 |               | -3.6859 down | 0.00041637 | 0.011286   |
| hsa_circ_0005497  | CNKSR3        | -3.7455 down | 0.0014518  | 0.028022   |
| hg38_circ_0018751 |               | -3.7789 down | 0.00067088 | 0.016584   |
| hsa_circ_0035435  | CGNL1         | -3.7974 down | 1.62E-07   | 3.43E-05   |
| hsa_circ_0004627  | UTP20         | -3.8239 down | 0.0030364  | 0.04379    |
| hg38_circ_0001795 |               | -3.8782 down | 0.0030664  | 0.04379    |
| hg38_circ_0027570 |               | -3.8944 down | 0.000312   | 0.0094203  |
| hsa_circ_0006479  | TEX2          | -3.9767 down | 0.0011787  | 0.02542    |
| hg38_circ_0021274 |               | -4.0077 down | 0.00142    | 0.027786   |
| hg38_circ_0023742 |               | -4.0264 down | 0.00043405 | 0.011612   |
| hg38_circ_0005777 |               | -4.0554 down | 0.0018681  | 0.032219   |
| hsa_circ_0080209  | GRB10         | -4.1053 down | 5.51E-05   | 0.002911   |
| hsa_circ_0002059  | MAN1A2        | -4.1367 down | 1.16E-05   | 0.00092444 |
| hg38_circ_0000214 |               | -4.1688 down | 5.80E-05   | 0.0030253  |
| hg38_circ_0000241 |               | -4.25 down   | 0.003122   | 0.044433   |
| hg38_circ_0004194 |               | -4.296 down  | 6.50E-07   | 0.00010169 |
| hsa_circ_0002383  | STARD10       | -4.3627 down | 0.0010163  | 0.02273    |
| hsa_circ_0002979  | CEACAM16      | -4.379 down  | 8.12E-07   | 0.00011842 |
| hg38_circ_0027050 |               | -4.4012 down | 0.0026027  | 0.039774   |
| hg38_circ_0012894 |               | -4.5194 down | 0.00072224 | 0.017545   |

|                   |          |              |            |            |
|-------------------|----------|--------------|------------|------------|
| hg38_circ_0011914 |          | -4.5464 down | 0.0036387  | 0.048368   |
| hg38_circ_0012792 |          | -4.5575 down | 0.0033754  | 0.046627   |
| hg38_circ_0024497 |          | -4.5761 down | 5.23E-05   | 0.0028006  |
| hg38_circ_0022684 |          | -4.6932 down | 1.01E-06   | 0.0001377  |
| hsa_circ_0026920  | SLC39A5  | -4.7203 down | 2.30E-05   | 0.0016305  |
| hg38_circ_0011449 |          | -4.8835 down | 6.71E-09   | 3.54E-06   |
| hg38_circ_0024330 |          | -4.989 down  | 2.69E-06   | 0.00033505 |
| hg38_circ_0011908 |          | -5.0002 down | 0.0022312  | 0.03586    |
| hg38_circ_0012788 |          | -5.0077 down | 5.97E-06   | 0.00057369 |
| hg38_circ_0027060 |          | -5.0813 down | 0.00017149 | 0.0069035  |
| hg38_circ_0015287 |          | -5.1143 down | 2.03E-05   | 0.0014822  |
| hg38_circ_0023664 |          | -5.2185 down | 0.0037003  | 0.048879   |
| hg38_circ_0011912 |          | -5.226 down  | 3.26E-06   | 0.00039421 |
| hsa_circ_0008804  | KDM3A    | -5.2566 down | 0.0034482  | 0.047018   |
| hg38_circ_0002864 |          | -5.2996 down | 0.0034284  | 0.046899   |
| hsa_circ_0002891  | PDIA3    | -5.3091 down | 0.0030051  | 0.043651   |
| hsa_circ_0001325  | BBX      | -5.3218 down | 0.0032098  | 0.044927   |
| hsa_circ_0047473  | KIAA1328 | -5.3243 down | 0.0032086  | 0.044927   |
| hsa_circ_0041154  | RPH3AL   | -5.3252 down | 4.47E-06   | 0.00048457 |
| hsa_circ_0058404  | OBSL1    | -5.41 down   | 0.0026189  | 0.03982    |
| hg38_circ_0028350 |          | -5.4386 down | 0.0024977  | 0.038674   |
| hg38_circ_0000232 |          | -5.4524 down | 0.0024535  | 0.038411   |
| hg38_circ_0012787 |          | -5.4956 down | 0.0021199  | 0.034732   |
| hg38_circ_0011904 |          | -5.5215 down | 0.0020047  | 0.033761   |
| hg38_circ_0022333 |          | -5.5298 down | 0.0017293  | 0.030458   |
| hsa_circ_0007123  | MLL3     | -5.537 down  | 0.0019786  | 0.033454   |
| hsa_circ_0068389  | MAP3K13  | -5.5613 down | 0.001635   | 0.029757   |
| hsa_circ_0021346  | SOX6     | -5.5901 down | 0.0017005  | 0.030259   |
| hsa_circ_0006290  | SLC7A1   | -5.6326 down | 0.0013412  | 0.026616   |
| hg38_circ_0020070 |          | -5.6646 down | 0.0012517  | 0.026063   |
| hsa_circ_0079223  | SDK1     | -5.6768 down | 0.0011742  | 0.02542    |
| hg38_circ_0000208 |          | -5.6818 down | 0.0012247  | 0.025755   |
| hg38_circ_0011913 |          | -5.6985 down | 1.71E-09   | 1.40E-06   |
| hg38_circ_0004887 |          | -5.6998 down | 0.0012922  | 0.026398   |
| hg38_circ_0012456 |          | -5.7978 down | 0.00085543 | 0.020088   |
| hg38_circ_0014361 |          | -5.8793 down | 0.00068824 | 0.016914   |
| hg38_circ_0003245 |          | -5.98 down   | 0.00051735 | 0.013583   |
| hg38_circ_0024489 |          | -6.0315 down | 0.0020601  | 0.034556   |
| hg38_circ_0024500 |          | -6.0528 down | 0.0019611  | 0.033291   |
| hg38_circ_0027057 |          | -6.1062 down | 0.00035879 | 0.010388   |
| hg38_circ_0011900 |          | -6.132 down  | 6.12E-15   | 2.59E-11   |
| hg38_circ_0015970 |          | -6.1395 down | 0.00037673 | 0.010546   |
| hg38_circ_0011910 |          | -6.1466 down | 0.00032276 | 0.0096412  |
| hg38_circ_0000217 |          | -6.3069 down | 0.00020568 | 0.0073678  |
| hg38_circ_0023830 |          | -6.3733 down | 0.00015155 | 0.0064181  |
| hg38_circ_0011906 |          | -6.7319 down | 4.90E-05   | 0.0026878  |
| hg38_circ_0020077 |          | -6.8856 down | 2.45E-05   | 0.0016883  |
| hsa_circ_0004390  | LPAR3    | -7.1784 down | 9.34E-06   | 0.0007895  |
| hg38_circ_0011903 |          | -7.3064 down | 4.59E-06   | 0.00048503 |
| hg38_circ_0011450 |          | -7.3323 down | 4.71E-06   | 0.00048516 |
| hg38_circ_0012893 |          | -7.8084 down | 6.39E-07   | 0.00010169 |
| hg38_circ_0011453 |          | -8.1851 down | 2.20E-07   | 4.04E-05   |
| hg38_circ_0011454 |          | -8.567 down  | 9.72E-09   | 3.94E-06   |
| hg38_circ_0012785 |          | -8.8801 down | 2.98E-08   | 8.99E-06   |

Circular RNA hsa\_circRNA\_0007334 is Predicted to Promote MMP7 and COL1A1 Expression by Functioning as miRNA Sponge in Pancreatic Ductal Adenocarcinoma

Jinghui Yang<sup>1</sup>, Xianling Cong<sup>3</sup>, Ming Ren<sup>4</sup>, Hongyan Sun<sup>3</sup>, Tao Liu<sup>5</sup>, Gaoyang Chen<sup>4</sup>, Qingyu Wang<sup>4</sup>, Zhaoyan Li<sup>4</sup>, Shan Yu<sup>2\*</sup>, Qiwei Yang<sup>4,6\*</sup>

| GO analysis        |                               |          |             |              |                                                                                                                                                                                                                                                                                                                                                                                                                                                                                                                                                                                                                                                                                                                                                                                                                                                                                                                                                                                                                                                                                                                |
|--------------------|-------------------------------|----------|-------------|--------------|----------------------------------------------------------------------------------------------------------------------------------------------------------------------------------------------------------------------------------------------------------------------------------------------------------------------------------------------------------------------------------------------------------------------------------------------------------------------------------------------------------------------------------------------------------------------------------------------------------------------------------------------------------------------------------------------------------------------------------------------------------------------------------------------------------------------------------------------------------------------------------------------------------------------------------------------------------------------------------------------------------------------------------------------------------------------------------------------------------------|
| Term_type          | Description                   | CAD_item | %           | GO_accession | Gene                                                                                                                                                                                                                                                                                                                                                                                                                                                                                                                                                                                                                                                                                                                                                                                                                                                                                                                                                                                                                                                                                                           |
| molecular_function | enzyme binding                | 34       | 15.66820276 | GO:0019899   | ENSG000000166501,ENSG000000129566,ENSG000000079841,ENSG000000197442,ENSG000000054611,ENSG000000110925,ENSG000000131236,ENSG000000038382,ENSG000000169180,ENSG000000116514,ENSG000000111490,ENSG000000140575,ENSG000000073803,ENSG000000124164,ENSG000000124126,ENSG000000164292,ENSG000000048052,ENSG000000169398,ENSG000000099282,ENSG000000213639,ENSG000000110395,ENSG000000124571,ENSG000000110880,ENSG000000148498,ENSG000000175899,ENSG000000147251,ENSG000000180530,ENSG000000013364,ENSG000000105329,ENSG000000106571,ENSG000000160087,ENSG00000008294,ENSG000000181031,ENSG000000110075                                                                                                                                                                                                                                                                                                                                                                                                                                                                                                               |
| molecular_function | hydrolase activity            | 34       | 15.66820276 | GO:0016787   | ENSG000000090861,ENSG000000173575,ENSG000000215704,ENSG000000175535,ENSG000000184640,ENSG000000142789,ENSG000000175497,ENSG000000142615,ENSG000000128849,ENSG000000134815,ENSG000000243480,ENSG000000213639,ENSG000000157483,ENSG000000118322,ENSG000000048052,ENSG000000141298,ENSG000000164292,ENSG000000080603,ENSG000000140470,ENSG000000168487,ENSG000000187021,ENSG000000240038,ENSG000000072657,ENSG000000133392,ENSG000000118961,ENSG000000153002,ENSG000000099139,ENSG000000219073,ENSG000000198162,ENSG000000157399,ENSG000000091704,ENSG000000266200,ENSG0000001917102,ENSG000000167004                                                                                                                                                                                                                                                                                                                                                                                                                                                                                                             |
| molecular_function | nucleotide binding            | 38       | 17.51152074 | GO:0000166   | ENSG000000116350,ENSG000000130529,ENSG000000135090,ENSG000000173575,ENSG000000090861,ENSG000000160087,ENSG000000184640,ENSG000000058091,ENSG000000080603,ENSG000000159216,ENSG000000067057,ENSG000000090376,ENSG000000118322,ENSG000000164292,ENSG000000169398,ENSG000000066468,ENSG000000157483,ENSG000000077044,ENSG000000134815,ENSG000000167601,ENSG000000171105,ENSG000000100077,ENSG000000164430,ENSG000000086991,ENSG00000000073803,ENSG000000154310,ENSG000000077782,ENSG000000038382,ENSG000000133392,ENSG000000154930,ENSG000000197442,ENSG000000197102,ENSG000000124813,ENSG000000159692,ENSG000000166501,ENSG000000119314,ENSG000000106049,ENSG000000129566                                                                                                                                                                                                                                                                                                                                                                                                                                        |
| molecular_function | nucleoside phosphate binding  | 38       | 17.51152074 | GO:1901265   | ENSG000000129566,ENSG000000166501,ENSG000000119314,ENSG000000106049,ENSG000000159692,ENSG000000154930,ENSG000000197442,ENSG000000197102,ENSG000000077782,ENSG000000038382,ENSG000000133392,ENSG000000073803,ENSG000000154310,ENSG000000171105,ENSG000000100077,ENSG000000164430,ENSG000000086991,ENSG000000157483,ENSG000000077044,ENSG000000134815,ENSG000000167601,ENSG000000090376,ENSG000000118322,ENSG000000169398,ENSG000000164292,ENSG000000066468,ENSG000000080603,ENSG000000159216,ENSG000000067057,ENSG000000173575,ENSG000000090861,ENSG000000160087,ENSG000000058091,ENSG000000184640,ENSG000000130529,ENSG000000135090,ENSG000000116350                                                                                                                                                                                                                                                                                                                                                                                                                                                           |
| molecular_function | small molecule binding        | 39       | 17.97235023 | GO:0036094   | ENSG000000169398,ENSG000000066468,ENSG000000164292,ENSG000000090376,ENSG000000130208,ENSG000000118322,ENSG000000167601,ENSG000000157483,ENSG000000077044,ENSG000000134815,ENSG000000067057,ENSG000000159216,ENSG000000135090,ENSG000000160087,ENSG000000184640,ENSG000000058091,ENSG000000173575,ENSG000000090861,ENSG000000116350,ENSG000000106049,ENSG000000166501,ENSG000000119314,ENSG0000000129566,ENSG000000154930,ENSG000000197442,ENSG000000197102,ENSG000000159692,ENSG000000124813,ENSG000000038382,ENSG000000133392,ENSG000000077782,ENSG000000086991,ENSG000000100077,ENSG000000171105,ENSG000000164430,ENSG000000073803                                                                                                                                                                                                                                                                                                                                                                                                                                                                           |
| molecular_function | metal ion binding             | 53       | 24.42396313 | GO:0046872   | ENSG000000072657,ENSG000000177463,ENSG000000167460,ENSG00000005844,ENSG000000148516,ENSG000000116514,ENSG000000115548,ENSG000000131873,ENSG000000143970,ENSG000000169896,ENSG000000077942,ENSG000000073803,ENSG000000140575,ENSG000000153002,ENSG000000164430,ENSG000000198162,ENSG000000153317,ENSG000000105701,ENSG000000138798,ENSG000000166501,ENSG000000157399,ENSG000000198604,ENSG000000091542,ENSG000000091704,ENSG000000184640,ENSG000000058091,ENSG000000173575,ENSG000000090861,ENSG000000116350,ENSG000000106049,ENSG000000166501,ENSG000000119314,ENSG0000000129566,ENSG000000154930,ENSG000000197442,ENSG000000197102,ENSG000000159692,ENSG000000124813,ENSG000000038382,ENSG000000133392,ENSG000000077782,ENSG000000086991,ENSG000000100077,ENSG000000171105,ENSG000000164430,ENSG000000073803                                                                                                                                                                                                                                                                                                  |
| molecular_function | anion binding                 | 54       | 24.88479263 | GO:0043168   | ENSG000000072657,ENSG000000177463,ENSG000000167460,ENSG00000005844,ENSG000000148516,ENSG000000116514,ENSG000000115548,ENSG000000131873,ENSG000000143970,ENSG000000169896,ENSG000000077942,ENSG000000073803,ENSG000000140575,ENSG000000153002,ENSG000000164430,ENSG000000198162,ENSG000000153317,ENSG000000105701,ENSG000000138798,ENSG000000166501,ENSG000000157399,ENSG000000198604,ENSG000000091542,ENSG000000091704,ENSG000000184640,ENSG000000058091,ENSG000000173575,ENSG000000090861,ENSG000000116350,ENSG000000106049,ENSG000000166501,ENSG000000119314,ENSG0000000129566,ENSG000000154930,ENSG000000197442,ENSG000000197102,ENSG000000159692,ENSG000000124813,ENSG000000038382,ENSG000000133392,ENSG000000077782,ENSG000000086991,ENSG000000100077,ENSG000000171105,ENSG000000164430,ENSG000000073803                                                                                                                                                                                                                                                                                                  |
| molecular_function | cation binding                | 55       | 25.34562212 | GO:0043169   | ENSG000000072657,ENSG000000177463,ENSG000000167460,ENSG00000005844,ENSG000000148516,ENSG000000116514,ENSG000000115548,ENSG000000131873,ENSG000000143970,ENSG000000169896,ENSG000000077942,ENSG000000073803,ENSG000000140575,ENSG000000153002,ENSG000000164430,ENSG000000198162,ENSG000000153317,ENSG000000105701,ENSG000000138798,ENSG000000166501,ENSG000000157399,ENSG000000198604,ENSG000000091542,ENSG000000091704,ENSG000000184640,ENSG000000058091,ENSG000000173575,ENSG000000090861,ENSG000000116350,ENSG000000106049,ENSG000000166501,ENSG000000119314,ENSG0000000129566,ENSG000000154930,ENSG000000197442,ENSG000000197102,ENSG000000159692,ENSG000000124813,ENSG000000038382,ENSG000000133392,ENSG000000077782,ENSG000000086991,ENSG000000100077,ENSG000000171105,ENSG000000164430,ENSG000000073803                                                                                                                                                                                                                                                                                                  |
| molecular_function | heterocyclic compound binding | 63       | 29.03225806 | GO:1901363   | ENSG000000134815,ENSG000000077044,ENSG000000157483,ENSG000000167601,ENSG000000118322,ENSG000000090376,ENSG000000141298,ENSG000000169398,ENSG000000164292,ENSG000000066468,ENSG000000116833,ENSG000000111269,ENSG000000159216,ENSG000000080603,ENSG000000180530,ENSG000000067057,ENSG000000067955,ENSG000000127152,ENSG000000124571,ENSG000000169946,ENSG000000173575,ENSG000000090861,ENSG000000184640,ENSG000000058091,ENSG000000160087,ENSG000000106571,ENSG000000130529,ENSG000000135090,ENSG000000110693,ENSG000000111087,ENSG000000116350,ENSG000000160094,ENSG000000129566,ENSG000000105701,ENSG000000119314,ENSG000000166501,ENSG000000106049,ENSG000000124813,ENSG000000105419,ENSG000000110925,ENSG000000159692,ENSG000000197102,ENSG000000197442,ENSG000000173068,ENSG000000154930,ENSG000000100485,ENSG000000148516,ENSG000000124788,ENSG000000177463,ENSG000000105556,ENSG000000077782,ENSG000000115548,ENSG000000133392,ENSG000000038382,ENSG000000119686,ENSG000000073803,ENSG000000143970,ENSG000000154310,ENSG000000114439,ENSG000000164430,ENSG000000100077,ENSG000000171105,ENSG000000086991 |

|                    |                                 |     |             |            |                                                                                                                                                                                                                                                                                                                                                                                                                                                                                                                                                                                                                                                                                                                                                                                                                                                                                                                                                                                                                                                                                                                                                                                                                                                                                                                                                                                                                                                                                                                                                                                                                                                                                                                                                                                                                                                                                                                                                                                                                                                                                                                                                                                                                                                                                                                                                                                                                                 |
|--------------------|---------------------------------|-----|-------------|------------|---------------------------------------------------------------------------------------------------------------------------------------------------------------------------------------------------------------------------------------------------------------------------------------------------------------------------------------------------------------------------------------------------------------------------------------------------------------------------------------------------------------------------------------------------------------------------------------------------------------------------------------------------------------------------------------------------------------------------------------------------------------------------------------------------------------------------------------------------------------------------------------------------------------------------------------------------------------------------------------------------------------------------------------------------------------------------------------------------------------------------------------------------------------------------------------------------------------------------------------------------------------------------------------------------------------------------------------------------------------------------------------------------------------------------------------------------------------------------------------------------------------------------------------------------------------------------------------------------------------------------------------------------------------------------------------------------------------------------------------------------------------------------------------------------------------------------------------------------------------------------------------------------------------------------------------------------------------------------------------------------------------------------------------------------------------------------------------------------------------------------------------------------------------------------------------------------------------------------------------------------------------------------------------------------------------------------------------------------------------------------------------------------------------------------------|
| molecular_function | organic cyclic compound binding | 63  | 29.03225806 | GO:0097159 | ENSG00000154930,ENSG00000197102,ENSG00000197442,ENSG00000173068,ENSG00000100485,ENSG00000105419,ENSG00000124813,ENSG00000159692,ENSG00000110925,ENSG00000166501,ENSG00000119314,ENSG00000106049,ENSG00000105701,ENSG00000129566,ENSG00000171105,ENSG00000100077,ENSG00000114439,ENSG00000164430,ENSG000000086991,ENSG000000073803,ENSG00000119686,ENSG00000154310,ENSG00000143970,ENSG00000115548,ENSG0000077782,ENSG000000038382,ENSG00000133392,ENSG00000124788,ENSG00000148516,ENSG00000105556,ENSG00000177463,ENSG00000169946,ENSG00000124571,ENSG000000080603,ENSG00000180530,ENSG00000159216,ENSG00000111269,ENSG00000127152,ENSG000000067955,ENSG000000067057,ENSG00000118322,ENSG000000090376,ENSG00000116833,ENSG00000169398,ENSG00000164292,ENSG000000066468,ENSG00000141298,ENSG000000077044,ENSG00000157483,ENSG00000134815,ENSG00000167601,ENSG00000160094,ENSG00000116350,ENSG00000111087,ENSG00000130529,ENSG00000110693,ENSG00000135090,ENSG00000173575,ENSG000000090861,ENSG00000160087,ENSG00000106571,ENSG00000184640,ENSG000000058091                                                                                                                                                                                                                                                                                                                                                                                                                                                                                                                                                                                                                                                                                                                                                                                                                                                                                                                                                                                                                                                                                                                                                                                                                                                                                                                                                                       |
| molecular_function | catalytic activity              | 76  | 35.02304147 | GO:0003824 | ENSG00000118322,ENSG00000048052,ENSG000000066468,ENSG00000141298,ENSG00000134815,ENSG000000077044,ENSG00000167601,ENSG00000240038,ENSG00000110395,ENSG000000080603,ENSG00000140470,ENSG00000168487,ENSG00000173575,ENSG00000184640,ENSG00000058091,ENSG00000175497,ENSG00000142615,ENSG00000128849,ENSG00000155660,ENSG00000150938,ENSG00000143811,ENSG00000138798,ENSG00000157399,ENSG00000106049,ENSG00000105701,ENSG00000167004,ENSG00000169902,ENSG000000091704,ENSG00000174939,ENSG000000091542,ENSG00000115548,ENSG00000133392,ENSG00000116514,ENSG00000153002,ENSG00000164430,ENSG000000099139,ENSG000000086991,ENSG00000154310,ENSG000000090376,ENSG00000169398,ENSG00000164292,ENSG00000243480,ENSG00000157483,ENSG000000213639,ENSG00000187021,ENSG000000067057,ENSG00000135090,ENSG000000090861,ENSG00000175535,ENSG00000215704,ENSG00000142789,ENSG00000166501,ENSG00000198380,ENSG00000100116,ENSG00000129566,ENSG00000219073,ENSG00000198162,ENSG00000197442,ENSG00000197102,ENSG00000162482,ENSG00000154930,ENSG00000159692,ENSG00000143797,ENSG00000266200,ENSG000000077782,ENSG00000216490,ENSG00000131873,ENSG000000038382,ENSG000000072657,ENSG00000171105,ENSG00000121964,ENSG00000100077,ENSG000000050748,ENSG00000118961,ENSG00000258539,ENSG000000073803                                                                                                                                                                                                                                                                                                                                                                                                                                                                                                                                                                                                                                                                                                                                                                                                                                                                                                                                                                                                                                                                                                                                                 |
| molecular_function | ion binding                     | 92  | 42.39631336 | GO:0043167 | ENSG00000107957,ENSG00000144426,ENSG00000156886,ENSG00000058091,ENSG00000184640,ENSG00000173575,ENSG00000186635,ENSG00000169851,ENSG00000134909,ENSG00000111087,ENSG000000048052,ENSG000000066468,ENSG00000118322,ENSG00000130208,ENSG00000167601,ENSG000000077044,ENSG00000134815,ENSG00000110395,ENSG00000169946,ENSG00000240038,ENSG00000168487,ENSG00000127152,ENSG00000140470,ENSG000000080603,ENSG00000133392,ENSG00000115548,ENSG00000167460,ENSG00000171517,ENSG00000116514,ENSG000000086991,ENSG00000140575,ENSG00000164430,ENSG00000103196,ENSG00000153002,ENSG00000154310,ENSG00000143970,ENSG000000077942,ENSG00000169896,ENSG00000138798,ENSG00000157399,ENSG00000153317,ENSG00000105701,ENSG00000145819,ENSG000000079841,ENSG00000173068,ENSG00000198604,ENSG000000091542,ENSG00000124813,ENSG000000091704,ENSG00000135090,ENSG00000130529,ENSG00000160087,ENSG00000106571,ENSG00000175535,ENSG000000090861,ENSG00000160094,ENSG00000102189,ENSG00000181031,ENSG00000124126,ENSG00000116833,ENSG00000164292,ENSG00000169398,ENSG000000090376,ENSG00000213639,ENSG00000157483,ENSG00000129515,ENSG00000243480,ENSG00000148498,ENSG00000151693,ENSG00000187021,ENSG000000067057,ENSG00000159216,ENSG000000038382,ENSG00000131873,ENSG000000077782,ENSG000000072657,ENSG00000177463,ENSG000000005844,ENSG00000148516,ENSG00000100077,ENSG00000171105,ENSG0000000073803,ENSG00000138119,ENSG00000166501,ENSG00000198162,ENSG00000129566,ENSG00000100116,ENSG00000157107,ENSG00000154930,ENSG00000143797,ENSG00000197442,ENSG00000197102                                                                                                                                                                                                                                                                                                                                                                                                                                                                                                                                                                                                                                                                                                                                                                                                                                                                               |
| molecular_function | protein binding                 | 144 | 66.359447   | GO:0005515 | ENSG00000145819,ENSG000000079841,ENSG00000167004,ENSG00000198604,ENSG00000136048,ENSG00000131236,ENSG00000124813,ENSG00000138798,ENSG00000164430,ENSG00000148935,ENSG00000140575,ENSG00000169896,ENSG00000154310,ENSG00000129116,ENSG00000171517,ENSG00000175899,ENSG000000071537,ENSG00000127152,ENSG00000180530,ENSG00000141298,ENSG00000176390,ENSG00000197256,ENSG00000167601,ENSG000000077044,ENSG00000124942,ENSG00000169851,ENSG00000186635,ENSG00000169862,ENSG00000110075,ENSG00000173575,ENSG00000213892,ENSG00000157107,ENSG0000010197102,ENSG00000162482,ENSG00000154930,ENSG00000159692,ENSG00000115221,ENSG00000138119,ENSG00000166501,ENSG00000129566,ENSG00000171105,ENSG00000106070,ENSG000000073803,ENSG00000138674,ENSG00000138434,ENSG000000038382,ENSG00000169180,ENSG000000005844,ENSG00000148498,ENSG00000124571,ENSG00000151693,ENSG000000067057,ENSG00000147251,ENSG000000067955,ENSG00000124164,ENSG00000116833,ENSG000000090376,ENSG00000129515,ENSG00000157483,ENSG00000135525,ENSG00000139514,ENSG00000105329,ENSG00000198879,ENSG00000160087,ENSG000000090861,ENSG00000100485,ENSG000000054611,ENSG00000173040,ENSG00000153317,ENSG00000105701,ENSG00000111490,ENSG000000086991,ENSG00000136040,ENSG00000115109,ENSG000000099139,ENSG000000077942,ENSG00000143970,ENSG000000076356,ENSG00000133392,ENSG00000115548,ENSG00000167460,ENSG00000116514,ENSG00000169946,ENSG00000110880,ENSG00000110395,ENSG000000057019,ENSG000000064666,ENSG00000168487,ENSG000000080603,ENSG000000048052,ENSG000000066468,ENSG00000150477,ENSG00000114554,ENSG00000118322,ENSG00000153721,ENSG00000124006,ENSG00000100099,ENSG00000135052,ENSG000000080493,ENSG00000134909,ENSG00000150938,ENSG00000111087,ENSG00000155660,ENSG00000107957,ENSG00000179715,ENSG0000000110693,ENSG00000184640,ENSG000000058091,ENSG000000025796,ENSG00000136237,ENSG00000163947,ENSG00000197442,ENSG00000143376,ENSG00000170927,ENSG00000110925,ENSG000000075223,ENSG00000105176,ENSG00000130956,ENSG000000050748,ENSG00000130429,ENSG00000216490,ENSG000000077782,ENSG00000138709,ENSG00000177463,ENSG00000148516,ENSG00000124788,ENSG00000146555,ENSG00000100068,ENSG00000159216,ENSG000000013364,ENSG00000164292,ENSG00000169398,ENSG00000124126,ENSG000000099282,ENSG00000196526,ENSG00000164483,ENSG00000213639,ENSG00000143768,ENSG00000102189,ENSG00000008294,ENSG00000181031,ENSG00000135090,ENSG00000130529,ENSG00000106571 |



|                    |                    |     |             |            |                                                                                                                                                                                                                                                                                                                                                                                                                                                                                                                                                                                                                                                                                                                                                                                                                                                                                                                                                                                                                                                                                                                                                                                                                                                                                                                                                                                                                                                                                                                                                                                                                                                                                                                                                                                                                                                                                                                                                                                                                                                                                                                                                                                                                                                                                                                                                                                                                                                                                                                                                                                                                                                                                                                                                                                                                                                                                                                                                                                                                                                                                                                                                                                                                                                                                                                                                                                                                                                                                                                                                                                                                                                                                                                                                                                                                                                                                                                                                                                                                                            |
|--------------------|--------------------|-----|-------------|------------|--------------------------------------------------------------------------------------------------------------------------------------------------------------------------------------------------------------------------------------------------------------------------------------------------------------------------------------------------------------------------------------------------------------------------------------------------------------------------------------------------------------------------------------------------------------------------------------------------------------------------------------------------------------------------------------------------------------------------------------------------------------------------------------------------------------------------------------------------------------------------------------------------------------------------------------------------------------------------------------------------------------------------------------------------------------------------------------------------------------------------------------------------------------------------------------------------------------------------------------------------------------------------------------------------------------------------------------------------------------------------------------------------------------------------------------------------------------------------------------------------------------------------------------------------------------------------------------------------------------------------------------------------------------------------------------------------------------------------------------------------------------------------------------------------------------------------------------------------------------------------------------------------------------------------------------------------------------------------------------------------------------------------------------------------------------------------------------------------------------------------------------------------------------------------------------------------------------------------------------------------------------------------------------------------------------------------------------------------------------------------------------------------------------------------------------------------------------------------------------------------------------------------------------------------------------------------------------------------------------------------------------------------------------------------------------------------------------------------------------------------------------------------------------------------------------------------------------------------------------------------------------------------------------------------------------------------------------------------------------------------------------------------------------------------------------------------------------------------------------------------------------------------------------------------------------------------------------------------------------------------------------------------------------------------------------------------------------------------------------------------------------------------------------------------------------------------------------------------------------------------------------------------------------------------------------------------------------------------------------------------------------------------------------------------------------------------------------------------------------------------------------------------------------------------------------------------------------------------------------------------------------------------------------------------------------------------------------------------------------------------------------------------------------------|
| molecular_function | binding            | 176 | 81.10599078 | GO:0005488 | <p>ENSG00000159216,ENSG00000013364,ENSG00000100068,ENSG00000146555,ENSG00000213639,ENSG00000143768,ENSG00000099282,ENSG00000164483,ENSG00000196526,ENSG00000169398,ENSG00000164292,ENSG00000124126,ENSG00000181031,ENSG00000008294,ENSG00000102189,ENSG00000175535,ENSG00000106571,ENSG00000130529,ENSG00000135090,ENSG00000105176,ENSG00000110925,ENSG00000075223,ENSG00000163947,ENSG00000197442,ENSG00000143376,ENSG00000170927,ENSG00000100116,ENSG00000198162,ENSG00000119314,ENSG00000119686,ENSG00000100077,ENSG00000130956,ENSG00000050748,ENSG00000148516,ENSG00000124788,ENSG00000177463,ENSG00000072657,ENSG00000216490,ENSG00000077782,ENSG00000131873,ENSG00000138709,ENSG00000130429,ENSG00000080603,ENSG00000064666,ENSG00000057019,ENSG00000168487,ENSG00000169946,ENSG00000110880,ENSG000000110395,ENSG00000134815,ENSG00000135052,ENSG00000124006,ENSG00000110099,ENSG00000118322,ENSG00000114554,ENSG00000130208,ENSG00000015372,1,ENSG00000048052,ENSG00000150477,ENSG00000066468,ENSG00000150938,ENSG00000111087,ENSG00000155660,ENSG00000134909,ENSG00000080493,ENSG00000136237,ENSG00000184640,ENSG00000058091,ENSG00000025796,ENSG00000156886,ENSG00000144426,ENSG00000107957,ENSG00000179715,ENSG00000110693,ENSG00000105419,ENSG00000054611,ENSG00000173068,ENSG00000100485,ENSG00000105701,ENSG00000153317,ENSG00000173040,ENSG00000157399,ENSG00000106049,ENSG00000076356,ENSG00000077942,ENSG00000143970,ENSG00000103196,ENSG00000115109,ENSG00000099139,ENSG00000111490,ENSG00000086991,ENSG00000136040,ENSG00000116514,ENSG00000167460,ENSG00000136478,ENSG00000115548,ENSG00000133392,ENSG00000111269,ENSG00000147251,ENSG00000067057,ENSG00000067955,ENSG00000187021,ENSG00000151693,ENSG00000124571,ENSG00000148498,ENSG00000129515,ENSG00000243480,ENSG00000157483,ENSG00000135525,ENSG00000090376,ENSG00000124164,ENSG00000116833,ENSG00000139514,ENSG00000160094,ENSG00000090861,ENSG00000198879,ENSG00000160087,ENSG00000105329,ENSG00000159692,ENSG00000197102,ENSG00000162482,ENSG00000154930,ENSG00000157107,ENSG00000129566,ENSG00000166501,ENSG00000138119,ENSG00000115221,ENSG00000106070,ENSG00000073803,ENSG00000138674,ENSG00000171105,ENSG00000058444,ENSG00000174238,ENSG00000169180,ENSG00000138434,ENSG00000038382,ENSG00000180530,ENSG00000140470,ENSG00000127152,ENSG00000071537,ENSG00000240038,ENSG00000175899,ENSG00000077044,ENSG00000167601,ENSG00000197256,ENSG00000141298,ENSG0000000176390,ENSG00000110075,ENSG00000169862,ENSG00000116350,ENSG00000124942,ENSG00000186635,ENSG00000169851,ENSG00000173575,ENSG00000213892,ENSG00000131236,ENSG00000136048,ENSG00000091704,ENSG00000124813,ENSG00000091542,ENSG00000198604,ENSG00000079841,ENSG00000167004,ENSG00000145819,ENSG00000146433,ENSG00000138798,ENSG00000169896,ENSG00000154310,ENSG00000164430,ENSG00000153002,ENSG00000148935,ENSG00000114439,ENSG00000140575,ENSG00000171517,ENSG00000105556,ENSG00000129116</p>                                                                                                                                                                                                                                                                                                                                                                                                                                                                                                                                                                                                                                                                                                                                                                                                                                                                                                                                                                                                                                                                                                |
| molecular_function | molecular_function | 205 | 94.47004608 | GO:0003674 | <p>ENSG00000104292,ENSG00000169398,ENSG00000124126,ENSG00000152078,ENSG00000099282,ENSG00000164483,ENSG00000196526,ENSG00000169398,ENSG00000164292,ENSG00000124126,ENSG00000181031,ENSG00000008294,ENSG00000102189,ENSG00000175535,ENSG00000106571,ENSG00000215704,ENSG00000175535,ENSG00000102189,ENSG00000008294,ENSG00000142789,ENSG00000181031,ENSG00000198380,ENSG00000119314,ENSG00000198162,ENSG00000100116,ENSG00000143376,ENSG000001197442,ENSG000001163947,ENSG00000170927,ENSG00000075223,ENSG00000110925,ENSG00000266200,ENSG00000105176,ENSG00000130429,ENSG00000131873,ENSG00000216490,ENSG00000077782,ENSG00000138709,ENSG00000177463,ENSG00000072657,ENSG00000148516,ENSG00000124788,ENSG00000130956,ENSG00000050748,ENSG00000100077,ENSG00000119686,ENSG000000258539,ENSG00000150477,ENSG00000066468,ENSG00000048052,ENSG00000130208,ENSG00000153721,ENSG00000118322,ENSG00000114554,ENSG00000139540,ENSG00000124006,ENSG00000100099,ENSG00000134815,ENSG00000135052,ENSG00000169946,ENSG00000110880,ENSG00000110395,ENSG00000169359,ENSG00000057019,ENSG00000064666,ENSG00000168487,ENSG00000080603,ENSG00000107957,ENSG00000179715,ENSG00000110693,ENSG00000144426,ENSG00000058091,ENSG00000184640,ENSG00000025796,ENSG00000156886,ENSG00000136237,ENSG00000080493,ENSG00000134909,ENSG00000155660,ENSG00000150938,ENSG00000111087,ENSG00000106049,ENSG00000173040,ENSG00000157399,ENSG00000153317,ENSG00000105701,ENSG00000100485,ENSG00000054611,ENSG00000173068,ENSG00000169902,ENSG00000105419,ENSG00000133392,ENSG00000115548,ENSG00000136478,ENSG00000167460,ENSG00000116514,ENSG00000111490,ENSG00000086991,ENSG00000136040,ENSG00000103196,ENSG00000115109,ENSG00000099139,ENSG00000077942,ENSG000000143970,ENSG00000076356,ENSG00000124164,ENSG00000116833,ENSG00000090376,ENSG00000243480,ENSG00000129515,ENSG00000157483,ENSG00000135525,ENSG00000148498,ENSG00000124571,ENSG00000187021,ENSG00000151693,ENSG00000147251,ENSG00000067057,ENSG00000067955,ENSG00000111269,ENSG00000105329,ENSG00000198879,ENSG00000033867,ENSG00000160087,ENSG00000090861,ENSG00000160094,ENSG00000139514,ENSG00000115221,ENSG00000138119,ENSG00000166501,ENSG00000219073,ENSG00000129566,ENSG00000157107,ENSG00000197102,ENSG00000162482,ENSG00000154930,ENSG00000159692,ENSG00000143797,ENSG00000138434,ENSG00000038382,ENSG00000169180,ENSG00000174238,ENSG00000058444,ENSG00000156011,ENSG0000012394,ENSG00000235568,ENSG00000121964,ENSG00000171105,ENSG00000106070,ENSG00000118961,ENSG00000073803,ENSG00000138674,ENSG00000141298,ENSG00000176390,ENSG00000197256,ENSG00000167601,ENSG00000077044,ENSG00000240038,ENSG00000175899,ENSG00000140470,ENSG00000071537,ENSG00000127152,ENSG00000180530,ENSG00000159128,ENSG00000101187,ENSG00000173575,ENSG00000213892,ENSG00000072954,ENSG000000124942,ENSG00000186635,ENSG00000128849,ENSG00000169851,ENSG00000138640,ENSG00000175497,ENSG00000116350,ENSG00000142615,ENSG00000169862,ENSG00000110075,ENSG00000143811,ENSG00000138798,ENSG00000106771,ENSG00000146433,ENSG00000145819,ENSG00000167004,ENSG00000079841,ENSG00000174939,ENSG00000091542,ENSG00000198604,ENSG00000131236,ENSG00000136048,ENSG00000091704,ENSG00000124813,ENSG00000129116,ENSG00000105556,ENSG00000171517,ENSG00000148935,ENSG00000164430,ENSG00000153002,ENSG00000114439,ENSG00000140575,ENSG00000169896,ENSG00000154310,ENSG00000136478,ENSG00000116514,ENSG00000171517,ENSG00000169902,ENSG00000136048,ENSG00000172765,ENSG00000164073,ENSG00000174939,ENSG00000173040,ENSG00000138798,ENSG00000105701,ENSG00000181826,ENSG00000106771,ENSG00000146433,ENSG00000175497,ENSG00000080493,ENSG00000124942,ENSG00000072954,ENSG00000150938,ENSG00000075420,ENSG00000134909,ENSG00000075420,ENSG00000144426,ENSG00000107031,ENSG00000159128,ENSG00000101187,ENSG00000103534,ENSG00000025796,ENSG00000156886,ENSG00000110880,ENSG00000110395,ENSG00000169359,ENSG00000057019,ENSG00000071537,ENSG00000114554,ENSG00000118322,ENSG00000066468,ENSG00000135052,ENSG00000167601,ENSG00000129540</p> |
| cellular_component | membrane part      | 82  | 37.78801843 | GO:0044425 | <p>ENSG00000159216,ENSG00000013364,ENSG00000100068,ENSG00000146555,ENSG00000213639,ENSG00000143768,ENSG00000099282,ENSG00000164483,ENSG00000196526,ENSG00000169398,ENSG00000164292,ENSG00000124126,ENSG00000181031,ENSG00000008294,ENSG00000102189,ENSG00000175535,ENSG00000106571,ENSG00000130529,ENSG00000135090,ENSG00000105176,ENSG00000110925,ENSG00000075223,ENSG00000163947,ENSG00000197442,ENSG00000143376,ENSG00000170927,ENSG00000100116,ENSG00000198162,ENSG00000119314,ENSG00000119686,ENSG00000100077,ENSG00000130956,ENSG00000050748,ENSG00000148516,ENSG00000124788,ENSG00000177463,ENSG00000072657,ENSG00000216490,ENSG00000077782,ENSG00000131873,ENSG00000138709,ENSG00000130429,ENSG00000080603,ENSG00000064666,ENSG00000057019,ENSG00000168487,ENSG00000169946,ENSG00000110880,ENSG000000110395,ENSG00000134815,ENSG00000135052,ENSG00000124006,ENSG00000110099,ENSG00000118322,ENSG00000114554,ENSG00000130208,ENSG00000015372,1,ENSG00000048052,ENSG00000150477,ENSG00000066468,ENSG00000150938,ENSG00000111087,ENSG00000155660,ENSG00000134909,ENSG00000080493,ENSG00000136237,ENSG00000184640,ENSG00000058091,ENSG00000025796,ENSG00000156886,ENSG00000144426,ENSG00000110693,ENSG00000105419,ENSG00000054611,ENSG00000173068,ENSG00000100485,ENSG00000105701,ENSG00000153317,ENSG00000173040,ENSG00000157399,ENSG00000106049,ENSG00000076356,ENSG00000077942,ENSG00000143970,ENSG00000103196,ENSG00000115109,ENSG00000099139,ENSG00000111490,ENSG00000086991,ENSG00000136040,ENSG00000116514,ENSG00000167460,ENSG00000136478,ENSG00000115548,ENSG00000133392,ENSG00000111269,ENSG00000147251,ENSG00000067057,ENSG00000067955,ENSG00000187021,ENSG00000151693,ENSG00000124571,ENSG00000148498,ENSG00000129515,ENSG00000243480,ENSG00000157483,ENSG00000135525,ENSG00000090376,ENSG00000124164,ENSG00000116833,ENSG00000139514,ENSG00000160094,ENSG00000090861,ENSG00000198879,ENSG00000160087,ENSG00000105329,ENSG00000159692,ENSG00000197102,ENSG00000162482,ENSG00000154930,ENSG00000157107,ENSG00000129566,ENSG00000166501,ENSG00000138119,ENSG00000115221,ENSG00000106070,ENSG00000073803,ENSG00000138674,ENSG00000171105,ENSG00000058444,ENSG00000174238,ENSG00000169180,ENSG00000138434,ENSG00000038382,ENSG00000180530,ENSG00000140470,ENSG00000127152,ENSG00000071537,ENSG00000240038,ENSG00000175899,ENSG00000077044,ENSG00000167601,ENSG00000197256,ENSG00000141298,ENSG0000000176390,ENSG00000110075,ENSG00000169862,ENSG00000116350,ENSG00000124942,ENSG00000186635,ENSG00000169851,ENSG00000173575,ENSG00000213892,ENSG00000131236,ENSG00000136048,ENSG00000091704,ENSG00000124813,ENSG00000091542,ENSG00000198604,ENSG00000079841,ENSG00000167004,ENSG00000145819,ENSG00000146433,ENSG00000138798,ENSG00000169896,ENSG00000154310,ENSG00000164430,ENSG00000153002,ENSG00000114439,ENSG00000140575,ENSG00000169896,ENSG00000154310,ENSG00000136478,ENSG00000116514,ENSG00000171517,ENSG00000169902,ENSG00000136048,ENSG00000172765,ENSG00000164073,ENSG00000174939,ENSG00000173040,ENSG00000138798,ENSG00000105701,ENSG00000181826,ENSG00000106771,ENSG00000146433,ENSG00000175497,ENSG00000080493,ENSG00000124942,ENSG00000072954,ENSG00000150938,ENSG00000075420,ENSG00000134909,ENSG00000075420,ENSG00000144426,ENSG00000107031,ENSG00000159128,ENSG00000101187,ENSG00000103534,ENSG00000025796,ENSG00000156886,ENSG00000110880,ENSG00000110395,ENSG00000169359,ENSG00000057019,ENSG00000071537,ENSG00000114554,ENSG00000118322,ENSG00000066468,ENSG00000135052,ENSG00000167601,ENSG00000129540</p>                                                                                                                                                                                                                                                                                                                                                                                                                                                                                                |

|                    |                              |     |             |            |                                                                                                                                                                                                                                                                                                                                                                                                                                                                                                                                                                                                                                                                                                                                                                                                                                                                                                                                                                                                                                                                                                                                                                                                                                                                                                                                                                                                                                                                                                                                                                                                                                                                                                                                                    |
|--------------------|------------------------------|-----|-------------|------------|----------------------------------------------------------------------------------------------------------------------------------------------------------------------------------------------------------------------------------------------------------------------------------------------------------------------------------------------------------------------------------------------------------------------------------------------------------------------------------------------------------------------------------------------------------------------------------------------------------------------------------------------------------------------------------------------------------------------------------------------------------------------------------------------------------------------------------------------------------------------------------------------------------------------------------------------------------------------------------------------------------------------------------------------------------------------------------------------------------------------------------------------------------------------------------------------------------------------------------------------------------------------------------------------------------------------------------------------------------------------------------------------------------------------------------------------------------------------------------------------------------------------------------------------------------------------------------------------------------------------------------------------------------------------------------------------------------------------------------------------------|
| cellular_component | intracellular organelle part | 104 | 47.92626728 | GO:0044446 | ENSG00000102189,ENSG000000008294,ENSG00000134369,ENSG00000181031,ENSG00000105329,ENSG00000130529,ENSG00000168389,ENSG00000198879,ENSG00000160087,ENSG00000106571,ENSG00000124571,ENSG00000151693,ENSG000000067955,ENSG00000159216,ENSG000000013364,ENSG00000169398,ENSG00000124164,ENSG00000116833,ENSG00000129515,ENSG00000157483,ENSG0000013639,ENSG00000135525,ENSG00000143768,ENSG00000156011,ENSG00000130956,ENSG00000050748,ENSG00000171105,ENSG00000138674,ENSG00000130429,ENSG00000216490,ENSG00000131873,ENSG00000169180,ENSG00000177463,ENSG00000148516,ENSG000000095139,ENSG00000124788,ENSG00000197102,ENSG00000143376,ENSG00000154930,ENSG00000170927,ENSG0000000159692,ENSG00000143797,ENSG00000105176,ENSG00000138119,ENSG00000166501,ENSG00000198162,ENSG00000129566,ENSG00000100116,ENSG000000072954,ENSG00000124942,ENSG00000186635,ENSG00000169851,ENSG00000128849,ENSG00000116350,ENSG00000134909,ENSG00000155660,ENSG00000110075,ENSG00000111087,ENSG00000170957,ENSG00000110693,ENSG00000159128,ENSG00000184640,ENSG00000025796,ENSG00000173575,ENSG000000213892,ENSG00000169946,ENSG00000169359,ENSG00000175899,ENSG000000064666,ENSG00000071537,ENSG00000180530,ENSG000000066468,ENSG00000048052,ENSG00000118322,ENSG00000124006,ENSG00000111490,ENSG000000086991,ENSG00000148935,ENSG00000114439,ENSG00000140575,ENSG000000099139,ENSG0000000196141,ENSG00000154310,ENSG00000143970,ENSG00000133392,ENSG00000129116,ENSG00000115548,ENSG00000167460,ENSG00000104671,ENSG0000000167004,ENSG00000169902,ENSG000000091542,ENSG000001198604,ENSG00000136048,ENSG00000172765,ENSG00000131236,ENSG00000164073,ENSG0000000124813,ENSG00000106049,ENSG00000143811,ENSG00000157399,ENSG00000173040,ENSG00000138798,ENSG00000105701 |
| cellular_component | organelle part               | 106 | 48.84792627 | GO:0044422 | ENSG00000102189,ENSG000000008294,ENSG00000134369,ENSG00000181031,ENSG00000105329,ENSG00000130529,ENSG00000168389,ENSG00000198879,ENSG00000160087,ENSG00000003867,ENSG00000124571,ENSG00000151693,ENSG00000067955,ENSG000000013364,ENSG00000159216,ENSG00000116833,ENSG00000124164,ENSG00000169398,ENSG00000164292,ENSG000000213639,ENSG00000135525,ENSG00000157483,ENSG00000143768,ENSG0000000129515,ENSG0000000130956,ENSG00000156011,ENSG0000000050748,ENSG00000171105,ENSG00000138674,ENSG00000130429,ENSG00000169180,ENSG0000010131873,ENSG000000216490,ENSG00000177463,ENSG00000124788,ENSG000000095139,ENSG00000148516,ENSG00000154930,ENSG00000170927,ENSG0000000143376,ENSG00000197102,ENSG00000143797,ENSG00000159692,ENSG00000105176,ENSG00000138119,ENSG00000166501,ENSG00000198162,ENSG00000100116,ENSG00000129566,ENSG00000128849,ENSG00000186635,ENSG00000169851,ENSG00000072954,ENSG00000124942,ENSG00000116350,ENSG00000134909,ENSG00000155660,ENSG00000111087,ENSG00000110075,ENSG00000110693,ENSG00000170957,ENSG00000159128,ENSG00000025796,ENSG00000184640,ENSG000000213892,ENSG00000173575,ENSG00000169359,ENSG00000169946,ENSG00000071537,ENSG000000064666,ENSG00000180530,ENSG00000048052,ENSG00000066468,ENSG00000118322,ENSG00000124006,ENSG00000086991,ENSG00000111490,ENSG00000140575,ENSG000000099139,ENSG00000148935,ENSG00000114439,ENSG00000143970,ENSG00000154310,ENSG0000000196141,ENSG00000129116,ENSG00000133392,ENSG00000115548,ENSG0000000167460,ENSG00000104671,ENSG00000169902,ENSG00000167004,ENSG000001198604,ENSG000000091542,ENSG00000136048,ENSG00000172765,ENSG00000136048,ENSG00000106049,ENSG00000173040,ENSG00000157399,ENSG00000138798,ENSG00000143811,ENSG000000106049                           |
| cellular_component | cytoplasmic part             | 109 | 50.23041475 | GO:0044444 | ENSG00000130956,ENSG00000050748,ENSG00000171105,ENSG00000138674,ENSG00000073803,ENSG00000118961,ENSG00000106070,ENSG00000038382,ENSG00000130429,ENSG00000131873,ENSG000000216490,ENSG00000077782,ENSG00000095139,ENSG00000157107,ENSG00000170927,ENSG00000154930,ENSG00000197442,ENSG00000163947,ENSG00000197102,ENSG00000143376,ENSG00000162482,ENSG00000143797,ENSG00000105176,ENSG000001198380,ENSG00000138119,ENSG00000166501,ENSG00000198162,ENSG00000100116,ENSG00000102189,ENSG00000008294,ENSG00000181031,ENSG00000105329,ENSG00000168389,ENSG00000130529,ENSG00000106571,ENSG00000160087,ENSG0000003867,ENSG00000090861,ENSG00000148498,ENSG00000124571,ENSG0000000151693,ENSG00000067057,ENSG00000147251,ENSG000000013364,ENSG00000124126,ENSG00000169398,ENSG00000164292,ENSG0000000213639,ENSG00000135525,ENSG00000157483,ENSG00000143768,ENSG00000129515,ENSG00000086991,ENSG00000140575,ENSG00000099139,ENSG000001164430,ENSG00000148935,ENSG00000103196,ENSG00000154310,ENSG00000031003,ENSG00000129116,ENSG00000133392,ENSG00000136478,ENSG00000167460,ENSG00000116514,ENSG00000145819,ENSG00000104671,ENSG00000100485,ENSG00000169902,ENSG000                                                                                                                                                                                                                                                                                                                                                                                                                                                                                                                                                                                     |

|                    |                                          |     |             |            |                                                                                                                                                                                                                                                                                                                                                                                                                                                                                                                                                                                                                                                                                                                                                                                                                                                                                                                                                                                                                                                                                                                                                                                                                                                                                                                                                                                                                                                                                                                                                                                                                                                                                                                                                                                                                                                                                                                                                                                                                                                                                                                                                                                                                                                                                                                                                                                                                                                                                                                                                                                                                                                                                                                                                                                                                                                                                                                                                                                                                                                                                                                                                                                                                                                                                                                                                                                                                                                                                                                                                                                                                                                                                                                                                                                                                                                                                                                                                                                                                                                                                                                                                                                                                                                                                                                                                                                |
|--------------------|------------------------------------------|-----|-------------|------------|--------------------------------------------------------------------------------------------------------------------------------------------------------------------------------------------------------------------------------------------------------------------------------------------------------------------------------------------------------------------------------------------------------------------------------------------------------------------------------------------------------------------------------------------------------------------------------------------------------------------------------------------------------------------------------------------------------------------------------------------------------------------------------------------------------------------------------------------------------------------------------------------------------------------------------------------------------------------------------------------------------------------------------------------------------------------------------------------------------------------------------------------------------------------------------------------------------------------------------------------------------------------------------------------------------------------------------------------------------------------------------------------------------------------------------------------------------------------------------------------------------------------------------------------------------------------------------------------------------------------------------------------------------------------------------------------------------------------------------------------------------------------------------------------------------------------------------------------------------------------------------------------------------------------------------------------------------------------------------------------------------------------------------------------------------------------------------------------------------------------------------------------------------------------------------------------------------------------------------------------------------------------------------------------------------------------------------------------------------------------------------------------------------------------------------------------------------------------------------------------------------------------------------------------------------------------------------------------------------------------------------------------------------------------------------------------------------------------------------------------------------------------------------------------------------------------------------------------------------------------------------------------------------------------------------------------------------------------------------------------------------------------------------------------------------------------------------------------------------------------------------------------------------------------------------------------------------------------------------------------------------------------------------------------------------------------------------------------------------------------------------------------------------------------------------------------------------------------------------------------------------------------------------------------------------------------------------------------------------------------------------------------------------------------------------------------------------------------------------------------------------------------------------------------------------------------------------------------------------------------------------------------------------------------------------------------------------------------------------------------------------------------------------------------------------------------------------------------------------------------------------------------------------------------------------------------------------------------------------------------------------------------------------------------------------------------------------------------------------------------------------|
| cellular_component | intracellular membrane-bounded organelle | 124 | 57.14285714 | GO:0043231 | ENSG00000186635,ENSG00000169851,ENSG00000124942,ENSG00000072954,ENSG00000110530,ENSG00000109862,ENSG00000134909,ENSG00000135600,ENSG00000111087,ENSG00000110075,ENSG00000110693,ENSG00000159128,ENSG00000184640,ENSG00000058091,ENSG00000025796,ENSG00000136237,ENSG00000173575,ENSG00000169359,ENSG00000110395,ENSG00000169946,ENSG00000175899,ENSG00000168487,ENSG00000127152,ENSG00000071537,ENSG00000180530,ENSG00000080603,ENSG00000066468,ENSG00000048052,ENSG00000130208,ENSG00000197256,ENSG00000114554,ENSG00000118322,ENSG00000100099,ENSG00000124006,ENSG00000135052,ENSG00000134815,ENSG00000086991,ENSG00000111490,ENSG00000099139,ENSG00000140575,ENSG00000114439,ENSG00000103196,ENSG00000115109,ENSG00000143970,ENSG00000154310,ENSG00000196141,ENSG00000129116,ENSG00000133392,ENSG00000136478,ENSG00000115548,ENSG00000105556,ENSG00000116514,ENSG00000169902,ENSG00000167004,ENSG00000173068,ENSG00000198604,ENSG00000091542,ENSG00000164073,ENSG00000105419,ENSG00000124813,ENSG00000172765,ENSG00000136048,ENSG00000106049,ENSG00000173040,ENSG00000157399,ENSG00000138798,ENSG00000143811,ENSG00000105701,ENSG00000160094,ENSG00000102189,ENSG00000008294,ENSG00000181031,ENSG00000105329,ENSG00000168389,ENSG00000130529,ENSG00000160087,ENSG00000198879,ENSG00000106571,ENSG00000124571,ENSG00000151693,ENSG00000067955,ENSG00000067057,ENSG0000013364,ENSG00000111269,ENSG00000159216,ENSG00000124164,ENSG00000124126,ENSG00000116833,ENSG00000164292,ENSG00000169398,ENSG00000090376,ENSG00000157483,ENSG0000013639,ENSG00000143768,ENSG00000129515,ENSG00000130956,ENSG00000050748,ENSG00000171105,ENSG00000138674,ENSG00000118961,ENSG00000138434,ENSG00000169180,ENSG00000138709,ENSG00000216490,ENSG00000077782,ENSG0000011873,ENSG00000177463,ENSG00000124788,ENSG00000095139,ENSG00000148516,ENSG00000157107,ENSG00000154930,ENSG00000170927,ENSG00000143376,ENSG00000143797,ENSG00000110925,ENSG00000159692,ENSG00000105176,ENSG00000138119,ENSG00000166501,ENSG00000119314,ENSG000001198162,ENSG00000100416,ENSG00000148552,ENSG00000130208,ENSG00000114334,ENSG00000135721,ENSG00000118322,ENSG00000100099,ENSG00000124006,ENSG00000135052,ENSG00000134815,ENSG00000169359,ENSG00000110395,ENSG00000110880,ENSG00000169946,ENSG00000168487,ENSG00000080603,ENSG00000170957,ENSG00000184640,ENSG00000058091,ENSG00000025796,ENSG00000134909,ENSG00000111087,ENSG00000155660,ENSG00000106049,ENSG00000157399,ENSG00000173040,ENSG00000153317,ENSG00000105701,ENSG00000104671,ENSG00000100485,ENSG00000169902,ENSG00000173068,ENSG00000133392,ENSG00000136478,ENSG00000115548,ENSG00000167460,ENSG00000116514,ENSG00000086991,ENSG00000099139,ENSG00000115109,ENSG00000103196,ENSG00000196141,ENSG00000124126,ENSG00000164292,ENSG00000169398,ENSG00000196526,ENSG00000213639,ENSG00000143768,ENSG00000013364,ENSG00000159216,ENSG00000135090,ENSG00000168389,ENSG00000188158,ENSG00000130529,ENSG00000106571,ENSG00000102189,ENSG00000008294,ENSG00000181031,ENSG00000134369,ENSG00000198380,ENSG00000198162,ENSG00000100116,ENSG00000170927,ENSG00000197442,ENSG00000143376,ENSG00000163947,ENSG00000105176,ENSG00000130429,ENSG00000216490,ENSG00000131873,ENSG00000077782,ENSG00000072657,ENSG00000124788,ENSG00000095139,ENSG00000148516,ENSG00000050748,ENSG00000130956,ENSG00000176390,ENSG00000141298,ENSG00000197256,ENSG00000077044,ENSG00000175899,ENSG00000071537,ENSG00000159128,ENSG00000169851,ENSG00000186635,ENSG00000138640,ENSG00000124942,ENSG00000072954,ENSG00000169862,ENSG00000110075,ENSG00000138798,ENSG00000143811,ENSG00000145819,ENSG00000167004,ENSG00000079841,ENSG00000124813,ENSG00000164073,ENSG00000172765,ENSG00000136048,ENSG00000131236,ENSG00000129116,ENSG00000140575,ENSG00000164430,ENSG00000148935,ENSG000000114439,ENSG00000154310,ENSG00000031003,ENSG00000124164,ENSG00000116833,ENSG00000090376,ENSG00000157483,ENSG00000135525,ENSG00000129515,ENSG00000124571,ENSG00000148498,ENSG00000151693,ENSG00000147251,ENSG00000067057,ENSG00000105329,ENSG00000160087,ENSG00000033867,ENSG00000090861,ENSG00000138119,ENSG00000166501,ENSG00000129566,ENSG00000157107,ENSG00000154930,ENSG00000162482,ENSG00000197102,ENSG00000143797,ENSG00000159692,ENSG00000038382,ENSG00000138434,ENSG00000169180,ENSG00000174238,ENSG00000171105,ENSG00000138674,ENSG00000072892,ENSG00000118961,ENSG00000106070 |
| cellular_component | cytoplasm                                | 141 | 64.97695853 | GO:0005737 | ENSG00000168389,ENSG00000130529,ENSG00000106571,ENSG00000102189,ENSG00000181031,ENSG00000134369,ENSG0000008294,ENSG00000124126,ENSG00000164292,ENSG00000169398,ENSG00000213639,ENSG00000143768,ENSG00000196526,ENSG0000013364,ENSG00000159216,ENSG00000138709,ENSG00000077782,ENSG00000216490,ENSG00000131873,ENSG00000130429,ENSG00000095139,ENSG00000124788,ENSG00000148516,ENSG00000177463,ENSG00000050748,ENSG00000130956,ENSG00000119314,ENSG00000100116,ENSG00000198162,ENSG00000170927,ENSG00000143376,ENSG00000105176,ENSG00000110925,ENSG00000110693,ENSG00000107957,ENSG00000136237,ENSG00000025796,ENSG00000184640,ENSG00000058091,ENSG00000155660,ENSG00000134815,ENSG00000100099,ENSG00000124006,ENSG00000169359,ENSG00000110395,ENSG00000169946,ENSG00000110880,ENSG00000080603,ENSG00000168487,ENSG00000066466,ENSG00000115548,ENSG00000136478,ENSG00000133392,ENSG00000116514,ENSG00000167460,ENSG00000099139,ENSG00000103196,ENSG00000115109,ENSG00000086991,ENSG00000111490,ENSG00000143970,ENSG00000196141,ENSG00000173040,ENSG00000157399,ENSG00000106049,ENSG00000105701,ENSG00000169902,ENSG00000173068,ENSG00000104671,ENSG00000105419,ENSG00000105329,ENSG00000198879,ENSG00000033867,ENSG00000160087,ENSG00000160094,ENSG00000090376,ENSG00000124164,ENSG00000116833,ENSG00000157483,ENSG00000135525,ENSG00000129515,ENSG00000067057,ENSG00000169180,ENSG00000067955,ENSG00000067057,ENSG00000169180,ENSG00000138434,ENSG00000171105,ENSG00000148498,ENSG00000111269,ENSG00000067955,ENSG00000067057,ENSG00000169180,ENSG00000138434,ENSG00000156011,ENSG00000138674,ENSG00000118961,ENSG00000166501,ENSG00000138119,ENSG00000129566,ENSG00000154930,ENSG00000197102,ENSG00000157107,ENSG00000143797,ENSG00000159692,ENSG00000159128,ENSG00000213892,ENSG00000173575,ENSG00000116350,ENSG00000128849,ENSG000000186635,ENSG00000169851,ENSG00000124942,ENSG00000072954,ENSG00000110075,ENSG00000169862,ENSG00000197256,ENSG00000141298,ENSG00000175899,ENSG00000180530,ENSG00000071537,ENSG00000127152,ENSG00000129116,ENSG00000105556,ENSG00000140575,ENSG00000148935,ENSG00000114439,ENSG00000154310,ENSG00000138798,ENSG00000143811,ENSG00000181826,ENSG00000167004,ENSG00000145819,ENSG00000124813,ENSG00000164073,ENSG00000136048,ENSG00000172765,ENSG00000131236,ENSG00000091542,ENSG00000198604                                                                                                                                                                                                                                                                                                                                                                                                                                                                                                                                                                                                                                                                                                                                                                                                                                                                                                                                                                                                                                                                                                                                                                                                                                                                                                                                                                                                                                                                                                                                                                                                                                                                                                                                                                                                                                                                                                                                                                                                                                                 |
| cellular_component | intracellular organelle                  | 144 | 66.359447   | GO:0043229 | ENSG00000168389,ENSG00000130529,ENSG00000106571,ENSG00000102189,ENSG00000181031,ENSG00000134369,ENSG0000008294,ENSG00000124126,ENSG00000164292,ENSG00000169398,ENSG00000213639,ENSG00000143768,ENSG00000196526,ENSG0000013364,ENSG00000159216,ENSG00000138709,ENSG00000077782,ENSG00000216490,ENSG00000131873,ENSG00000130429,ENSG00000095139,ENSG00000124788,ENSG00000148516,ENSG00000177463,ENSG00000050748,ENSG00000130956,ENSG00000119314,ENSG00000100116,ENSG00000198162,ENSG00000170927,ENSG00000143376,ENSG00000105176,ENSG00000110925,ENSG00000110693,ENSG00000107957,ENSG00000136237,ENSG00000025796,ENSG00000184640,ENSG00000058091,ENSG00000155660,ENSG00000134815,ENSG00000100099,ENSG00000124006,ENSG00000169359,ENSG00000110395,ENSG00000169946,ENSG00000110880,ENSG00000080603,ENSG00000168487,ENSG00000066466,ENSG00000115548,ENSG00000136478,ENSG00000133392,ENSG00000116514,ENSG00000167460,ENSG00000099139,ENSG00000103196,ENSG00000115109,ENSG00000086991,ENSG00000111490,ENSG00000143970,ENSG00000196141,ENSG00000173040,ENSG00000157399,ENSG00000106049,ENSG00000105701,ENSG00000169902,ENSG00000173068,ENSG00000104671,ENSG00000105419,ENSG00000105329,ENSG00000198879,ENSG00000033867,ENSG00000160087,ENSG00000160094,ENSG00000090376,ENSG00000124164,ENSG00000116833,ENSG00000157483,ENSG00000135525,ENSG00000129515,ENSG00000067057,ENSG00000169180,ENSG00000067955,ENSG00000067057,ENSG00000169180,ENSG00000138434,ENSG00000171105,ENSG00000148498,ENSG00000111269,ENSG00000067955,ENSG00000067057,ENSG00000169180,ENSG00000138434,ENSG00000156011,ENSG00000138674,ENSG00000118961,ENSG00000166501,ENSG00000138119,ENSG00000129566,ENSG00000154930,ENSG00000197102,ENSG00000157107,ENSG00000143797,ENSG00000159692,ENSG00000159128,ENSG00000213892,ENSG00000173575,ENSG00000116350,ENSG00000128849,ENSG000000186635,ENSG00000169851,ENSG00000124942,ENSG00000072954,ENSG00000110075,ENSG00000169862,ENSG00000197256,ENSG00000141298,ENSG00000175899,ENSG00000180530,ENSG00000071537,ENSG00000127152,ENSG00000129116,ENSG00000105556,ENSG00000140575,ENSG00000148935,ENSG00000114439,ENSG00000154310,ENSG00000138798,ENSG00000143811,ENSG00000181826,ENSG00000167004,ENSG00000145819,ENSG00000124813,ENSG00000164073,ENSG00000136048,ENSG00000172765,ENSG00000131236,ENSG00000091542,ENSG00000198604                                                                                                                                                                                                                                                                                                                                                                                                                                                                                                                                                                                                                                                                                                                                                                                                                                                                                                                                                                                                                                                                                                                                                                                                                                                                                                                                                                                                                                                                                                                                                                                                                                                                                                                                                                                                                                                                                                                                                                                                                                                 |

|                    |                            |     |             |            |                                                                                                                                                                                                                                                                                                                                                                                                                                                                                                                                                                                                                                                                                                                                                                                                                                                                                                                                                                                                                                                                                                                                                                                                                                                                                                                                                                                                                                                                                                                                                                                                                                                                                                                                                                                                                                                                                                                                                                                                                                                                                                                                                                                                                                                                                                                                                                                                                                                                                                                                                                                                                                                                                                                                                                                                                                                                                                                                                                                                                                                                                                                                                                                                                                                                                                                                                                                                                                                                                                                                                                                                                                                                                                                                                                                                                                                                                                                                                                                                                                                                                                                                                                                                                                                                                                                                                                                                                                                                                                                                                                                                                                                                                                                                                                                                  |
|--------------------|----------------------------|-----|-------------|------------|--------------------------------------------------------------------------------------------------------------------------------------------------------------------------------------------------------------------------------------------------------------------------------------------------------------------------------------------------------------------------------------------------------------------------------------------------------------------------------------------------------------------------------------------------------------------------------------------------------------------------------------------------------------------------------------------------------------------------------------------------------------------------------------------------------------------------------------------------------------------------------------------------------------------------------------------------------------------------------------------------------------------------------------------------------------------------------------------------------------------------------------------------------------------------------------------------------------------------------------------------------------------------------------------------------------------------------------------------------------------------------------------------------------------------------------------------------------------------------------------------------------------------------------------------------------------------------------------------------------------------------------------------------------------------------------------------------------------------------------------------------------------------------------------------------------------------------------------------------------------------------------------------------------------------------------------------------------------------------------------------------------------------------------------------------------------------------------------------------------------------------------------------------------------------------------------------------------------------------------------------------------------------------------------------------------------------------------------------------------------------------------------------------------------------------------------------------------------------------------------------------------------------------------------------------------------------------------------------------------------------------------------------------------------------------------------------------------------------------------------------------------------------------------------------------------------------------------------------------------------------------------------------------------------------------------------------------------------------------------------------------------------------------------------------------------------------------------------------------------------------------------------------------------------------------------------------------------------------------------------------------------------------------------------------------------------------------------------------------------------------------------------------------------------------------------------------------------------------------------------------------------------------------------------------------------------------------------------------------------------------------------------------------------------------------------------------------------------------------------------------------------------------------------------------------------------------------------------------------------------------------------------------------------------------------------------------------------------------------------------------------------------------------------------------------------------------------------------------------------------------------------------------------------------------------------------------------------------------------------------------------------------------------------------------------------------------------------------------------------------------------------------------------------------------------------------------------------------------------------------------------------------------------------------------------------------------------------------------------------------------------------------------------------------------------------------------------------------------------------------------------------------------------------------------|
| cellular_component | membrane-bounded organelle | 148 | 68.20276498 | GO:0043227 | ENSG00000180094,ENSG00000105329,ENSG00000090861,ENSG00000180087,ENSG00000198879,ENSG00000181893,ENSG00000124571,ENSG00000111269,ENSG00000067057,ENSG00000067955,ENSG00000090376,ENSG00000124164,ENSG00000116833,ENSG00000129515,ENSG00000243480,ENSG00000157483,ENSG00000171105,ENSG00000118961,ENSG00000138674,ENSG00000169180,ENSG00000138434,ENSG00000005844,ENSG00000174238,ENSG00000162482,ENSG00000197102,ENSG00000154930,ENSG00000157107,ENSG00000159692,ENSG00000143797,ENSG00000166501,ENSG00000115221,ENSG00000138119,ENSG0000010129566,ENSG00000116350,ENSG00000072954,ENSG00000124942,ENSG00000186635,ENSG00000169851,ENSG00000110075,ENSG00000169862,ENSG00000159128,ENSG00000173575,ENSG00000240038,ENSG00000175899,ENSG00000180530,ENSG00000071537,ENSG00000127152,ENSG00000197256,ENSG00000167601,ENSG00000114439,ENSG00000140575,ENSG00000169896,ENSG00000154310,ENSG00000129116,ENSG00000105556,ENSG00000167004,ENSG00000136048,ENSG00000172765,ENSG00000131236,ENSG00000164073,ENSG00000124813,ENSG00000091542,ENSG00000198604,ENSG00000138798,ENSG00000102189,ENSG00000181031,ENSG00000008294,ENSG00000130529,ENSG00000168389,ENSG00000106571,ENSG00000146555,ENSG00000159216,ENSG0000013364,ENSG00000169398,ENSG00000164292,ENSG00000124126,ENSG00000143768,ENSG00000213639,ENSG00000099282,ENSG00000050748,ENSG00000130956,ENSG00000216490,ENSG00000007782,ENSG00000131873,ENSG00000138709,ENSG00000130429,ENSG00000148516,ENSG00000124788,ENSG000000095139,ENSG00000177463,ENSG00000072657,ENSG00000143376,ENSG00000170927,ENSG00000105176,ENSG00000075223,ENSG00000110925,ENSG00000119314,ENSG00000198380,ENSG00000100116,ENSG00000198162,ENSG00000080493,ENSG00000111087,ENSG00000155660,ENSG00000150938,ENSG000000134909,ENSG00000110693,ENSG00000103534,ENSG00000136237,ENSG00000184640,ENSG0000025796,ENSG00000169946,ENSG00000169359,ENSG00000110395,ENSG00000080603,ENSG00000064666,ENSG00000168487,ENSG00000130208,ENSG00000114554,ENSG00000118322,ENSG00000066468,ENSG00000048052,ENSG00000134815,ENSG00000135052,ENSG00000124006,ENSG00000139540,ENSG00000100099,ENSG00000115109,ENSG00000103196,ENSG00000099139,ENSG00000111490,ENSG00000086991,ENSG00000196141,ENSG00000143970,ENSG00000136478,ENSG00000115548,ENSG00000133392,ENSG00000116514,ENSG00000167460,ENSG00000173068,ENSG00000169902,ENSG00000105419,ENSG00000157399,ENSG00000173040,ENSG00000106049,ENSG00000105701,ENSG00000110604,ENSG00000173040,ENSG00000157399,ENSG00000143970,ENSG00000196141,ENSG00000077942,ENSG00000111490,ENSG00000086991,ENSG00000099139,ENSG00000103196,ENSG00000115109,ENSG00000167460,ENSG00000116514,ENSG00000133392,ENSG00000115548,ENSG00000136478,ENSG0000013364,ENSG00000146555,ENSG00000196526,ENSG00000099282,ENSG00000143768,ENSG00000213639,ENSG00000124126,ENSG00000169398,ENSG00000164292,ENSG00000008294,ENSG00000181031,ENSG00000134369,ENSG00000102189,ENSG00000106571,ENSG00000168389,ENSG00000130529,ENSG00000075223,ENSG00000110925,ENSG00000105176,ENSG00000170927,ENSG00000143376,ENSG00000198162,ENSG00000100116,ENSG00000198380,ENSG00000119314,ENSG00000050748,ENSG00000130956,ENSG00000072657,ENSG000001077463,ENSG00000124788,ENSG00000095139,ENSG00000148516,ENSG00000130429,ENSG00000138709,ENSG00000216490,ENSG00000077782,ENSG00000121873,ENSG00000184040,ENSG00000086991,ENSG0000025796,ENSG00000136237,ENSG00000110693,ENSG00000170957,ENSG00000105419,ENSG00000134909,ENSG00000130607,ENSG00000118322,ENSG00000130208,ENSG00000153721,ENSG00000168487,ENSG00000064666,ENSG00000080603,ENSG00000169359,ENSG00000110395,ENSG000000110880,ENSG00000169946,ENSG00000167460,ENSG00000116514,ENSG00000133392,ENSG00000115548,ENSG00000136478,ENSG0000013364,ENSG00000146555,ENSG00000196526,ENSG00000099282,ENSG00000143768,ENSG00000213639,ENSG00000124126,ENSG00000169398,ENSG00000164292,ENSG00000008294,ENSG00000181031,ENSG00000134369,ENSG00000102189,ENSG00000106571,ENSG00000168389,ENSG00000130529,ENSG00000075223,ENSG00000110925,ENSG00000105176,ENSG00000170927,ENSG00000143376,ENSG00000198162,ENSG00000100116,ENSG00000198380,ENSG00000119314,ENSG00000050748,ENSG00000130956,ENSG00000072657,ENSG000001077463,ENSG00000124788,ENSG00000095139,ENSG00000148516,ENSG00000130429,ENSG00000138709,ENSG00000216490,ENSG00000077782,ENSG00000121873,ENSG00000184040,ENSG00000086991,ENSG0000025796,ENSG00000136237,ENSG00000110693,ENSG00000170957,ENSG00000105419,ENSG00000134909,ENSG00000130607,ENSG00000118322,ENSG00000130208,ENSG00000153721,ENSG00000168487,ENSG00000064666,ENSG00000080603,ENSG00000169359,ENSG00000110395,ENSG000000110880,ENSG00000169946,ENSG00000167460,ENSG00000116514,ENSG00000133392,ENSG00000115548,ENSG00000136478,ENSG0000013364,ENSG00000146555,ENSG00000196526,ENSG00000099282,ENSG00000143768 |
|--------------------|----------------------------|-----|-------------|------------|--------------------------------------------------------------------------------------------------------------------------------------------------------------------------------------------------------------------------------------------------------------------------------------------------------------------------------------------------------------------------------------------------------------------------------------------------------------------------------------------------------------------------------------------------------------------------------------------------------------------------------------------------------------------------------------------------------------------------------------------------------------------------------------------------------------------------------------------------------------------------------------------------------------------------------------------------------------------------------------------------------------------------------------------------------------------------------------------------------------------------------------------------------------------------------------------------------------------------------------------------------------------------------------------------------------------------------------------------------------------------------------------------------------------------------------------------------------------------------------------------------------------------------------------------------------------------------------------------------------------------------------------------------------------------------------------------------------------------------------------------------------------------------------------------------------------------------------------------------------------------------------------------------------------------------------------------------------------------------------------------------------------------------------------------------------------------------------------------------------------------------------------------------------------------------------------------------------------------------------------------------------------------------------------------------------------------------------------------------------------------------------------------------------------------------------------------------------------------------------------------------------------------------------------------------------------------------------------------------------------------------------------------------------------------------------------------------------------------------------------------------------------------------------------------------------------------------------------------------------------------------------------------------------------------------------------------------------------------------------------------------------------------------------------------------------------------------------------------------------------------------------------------------------------------------------------------------------------------------------------------------------------------------------------------------------------------------------------------------------------------------------------------------------------------------------------------------------------------------------------------------------------------------------------------------------------------------------------------------------------------------------------------------------------------------------------------------------------------------------------------------------------------------------------------------------------------------------------------------------------------------------------------------------------------------------------------------------------------------------------------------------------------------------------------------------------------------------------------------------------------------------------------------------------------------------------------------------------------------------------------------------------------------------------------------------------------------------------------------------------------------------------------------------------------------------------------------------------------------------------------------------------------------------------------------------------------------------------------------------------------------------------------------------------------------------------------------------------------------------------------------------------------------------------------|

|                    |               |     |             |            |                                                                                                                                                                                                                                                                                                                                                                                                                                                                                                                                                                                                                                                                                                                                                                                                                                                                                                                                                                                                                                                                                                                                                                                                                                                                                                                                                                                                                                                                                                                                                                                                                                                                                                                                                                                                                                                                                                                                                                                                                                                                                                                                                                                                                                                                                                                                                                                                                                                                                                                                                                                                                                                                                                                                                                                                                                                                                                                                                                                                                                                                                                                                                           |
|--------------------|---------------|-----|-------------|------------|-----------------------------------------------------------------------------------------------------------------------------------------------------------------------------------------------------------------------------------------------------------------------------------------------------------------------------------------------------------------------------------------------------------------------------------------------------------------------------------------------------------------------------------------------------------------------------------------------------------------------------------------------------------------------------------------------------------------------------------------------------------------------------------------------------------------------------------------------------------------------------------------------------------------------------------------------------------------------------------------------------------------------------------------------------------------------------------------------------------------------------------------------------------------------------------------------------------------------------------------------------------------------------------------------------------------------------------------------------------------------------------------------------------------------------------------------------------------------------------------------------------------------------------------------------------------------------------------------------------------------------------------------------------------------------------------------------------------------------------------------------------------------------------------------------------------------------------------------------------------------------------------------------------------------------------------------------------------------------------------------------------------------------------------------------------------------------------------------------------------------------------------------------------------------------------------------------------------------------------------------------------------------------------------------------------------------------------------------------------------------------------------------------------------------------------------------------------------------------------------------------------------------------------------------------------------------------------------------------------------------------------------------------------------------------------------------------------------------------------------------------------------------------------------------------------------------------------------------------------------------------------------------------------------------------------------------------------------------------------------------------------------------------------------------------------------------------------------------------------------------------------------------------------|
| cellular_component | intracellular | 168 | 77.41935484 | GO:0005622 | <p>ENSG00000129566,ENSG00000138119,ENSG00000166501,ENSG00000143797,ENSG00000159692,ENSG00000157107,ENSG00000154930,ENSG00000162482,ENSG000001197102,ENSG00000174238,ENSG00000038382,ENSG00000138434,ENSG00000169180,ENSG00000073803,ENSG00000138674,ENSG00000106070,ENSG00000118961,ENSG000000235568,ENSG00000156011,ENSG00000171105,ENSG00000135525,ENSG00000157483,ENSG00000129515,ENSG00000124164,ENSG00001168333,ENSG00000090376,ENSG00000067955,ENSG00000067057,ENSG00000147251,ENSG00000111269,ENSG00000124571,ENSG00000148498,ENSG00000151693,ENSG00000198879,ENSG00000160087,ENSG00000033867,ENSG00000090861,ENSG00000105329,ENSG00000160094,ENSG00000181826,ENSG00000138798,ENSG00000143811,ENSG000000091542,ENSG00000198604,ENSG00000164073,ENSG00000124813,ENSG00000131236,ENSG00000172765,ENSG000001036048,ENSG00000145819,ENSG00000167004,ENSG00000079841,ENSG00000105556,ENSG00000129116,ENSG00000154310,ENSG00000031003,ENSG00000140575,ENSG00000164430,ENSG00000114439,ENSG00000148935,ENSG00000077044,ENSG00000176390,ENSG00000141298,ENSG00000197256,ENSG00000127152,ENSG00000071537,ENSG000001180530,ENSG00000175899,ENSG00000173575,ENSG00000213892,ENSG00000159128,ENSG00000169862,ENSG00000110075,ENSG00000186635,ENSG00000169851,ENSG00000128849,ENSG00000138640,ENSG00000124942,ENSG00000072954,ENSG00000116350,ENSG00000198162,ENSG0000100116,ENSG00000198380,ENSG00000119314,ENSG00000110925,ENSG00000105176,ENSG00000170927,ENSG00000143376,ENSG00000197442,ENSG00000163947,ENSG00000072657,ENSG00000177463,ENSG00000124788,ENSG00000095139,ENSG00000148516,ENSG00000130429,ENSG00000138709,ENSG000001077782,ENSG00000216490,ENSG00000131873,ENSG00000050748,ENSG00000130956,ENSG00000196526,ENSG00000143768,ENSG00000213639,ENSG00000124126,ENSG00000164292,ENSG00000169398,ENSG00000013364,ENSG00000159216,ENSG00000106571,ENSG00000135090,ENSG00000168389,ENSG00000188158,ENSG00000130529,ENSG00000008294,ENSG00000181031,ENSG00000134369,ENSG00000102189,ENSG00000153317,ENSG00000105701,ENSG00000106049,ENSG00000157399,ENSG00000173040,ENSG00000105419,ENSG00000104671,ENSG00000100485,ENSG00000169902,ENSG00000054611,ENSG00000173068,ENSG00000167460,ENSG00000116514,ENSG00000133392,ENSG00000136478,ENSG00000115548,ENSG00000143970,ENSG00000196141,ENSG00000111490,ENSG00000086991,ENSG00000099139,ENSG00000115109,ENSG00000103196,ENSG00000100099,ENSG00000124006,ENSG00000135052,ENSG00000134815,ENSG00000048052,ENSG00000066468,ENSG00000118322,ENSG00000114554,ENSG00000153721,ENSG00000130208,ENSG00000168487,ENSG00000064666,ENSG00000080603,ENSG00000169359,ENSG00000110395,ENSG00000169946,ENSG00000110880,ENSG000001184640,ENSG00000025796,ENSG00000058091,ENSG00000136237,ENSG00000110693,ENSG00000107957,ENSG00000134909,ENSG00000155660,ENSG00000111087</p>                                                                                                                                                                                                                                                                                                                                              |
| cellular_component | cell part     | 190 | 87.55760369 | GO:0044464 | <p>ENSG00000124104,ENSG00000116833,ENSG00000090376,ENSG00000129315,ENSG00000137483,ENSG00000135525,ENSG00000148498,ENSG00000124571,ENSG00000151693,ENSG00000147251,ENSG00000067057,ENSG00000067955,ENSG00000111269,ENSG00000105329,ENSG00000198879,ENSG00000160087,ENSG00000033867,ENSG00000090861,ENSG00000160094,ENSG00000139514,ENSG00000115221,ENSG00000138119,ENSG00000166501,ENSG00000129566,ENSG00000157107,ENSG00000162482,ENSG00000197102,ENSG00000154930,ENSG00000159692,ENSG00000143797,ENSG00000138434,ENSG00000038382,ENSG000001069180,ENSG00000174238,ENSG00000005844,ENSG00000156011,ENSG00000112394,ENSG00000235568,ENSG00000171105,ENSG00000106070,ENSG00000118961,ENSG00000073803,ENSG00000138674,ENSG00000141298,ENSG00000176390,ENSG00000197256,ENSG00000167601,ENSG00000077044,ENSG00000175899,ENSG00000071537,ENSG00000127152,ENSG000001180530,ENSG00000101187,ENSG00000159128,ENSG00000173575,ENSG00000213892,ENSG00000124942,ENSG00000072954,ENSG00000186635,ENSG00000169851,ENSG00000138640,ENSG00000128849,ENSG00000175497,ENSG00000116350,ENSG00000169862,ENSG00000110075,ENSG00000143811,ENSG00000138798,ENSG00000181826,ENSG00000145819,ENSG00000079841,ENSG00000167004,ENSG00000091542,ENSG00000198604,ENSG00000136048,ENSG00000172765,ENSG00000131236,ENSG00000124813,ENSG00000164073,ENSG00000129116,ENSG00000105556,ENSG0000171517,ENSG00000164430,ENSG00000148935,ENSG00000114439,ENSG00000140575,ENSG00000169896,ENSG00000154310,ENSG00000031003,ENSG00000169398,ENSG00000164292,ENSG00000124126,ENSG00000099282,ENSG00000196526,ENSG00000143768,ENSG00000213639,ENSG00000146555,ENSG00000100068,ENSG00000159216,ENSG00000013364,ENSG00000135090,ENSG00000130529,ENSG00000188158,ENSG00000168389,ENSG00000106571,ENSG000000102189,ENSG00000008294,ENSG00000134369,ENSG00000181031,ENSG00000198380,ENSG00000119314,ENSG00000198162,ENSG00000100116,ENSG00000197442,ENSG00000143376,ENSG00000163947,ENSG00000170927,ENSG00000110925,ENSG00000105176,ENSG00000130429,ENSG00000131873,ENSG00000216490,ENSG00000077782,ENSG00000138709,ENSG00000177463,ENSG00000072657,ENSG00000148516,ENSG00000124788,ENSG00000095139,ENSG00000130956,ENSG00000050748,ENSG00000100077,ENSG00000119686,ENSG00000066468,ENSG00000048052,ENSG00000118322,ENSG00000114554,ENSG00000153721,ENSG00000130208,ENSG00000124006,ENSG00000139540,ENSG00000100099,ENSG00000134815,ENSG00000135052,ENSG00000169946,ENSG00000110880,ENSG00000169359,ENSG00000110395,ENSG00000057019,ENSG00000064666,ENSG00000168487,ENSG00000080603,ENSG00000107957,ENSG00000110693,ENSG00000144426,ENSG00000184640,ENSG00000025796,ENSG00000058091,ENSG00000156886,ENSG00000136237,ENSG00000080493,ENSG00000134909,ENSG00000150938,ENSG00000155660,ENSG00000111087,ENSG00000106049,ENSG00000173040,ENSG00000157399,ENSG00000153317,ENSG00000105701,ENSG000000100485,ENSG00000104671,ENSG00000173068,ENSG00000054611,ENSG00000169902,ENSG00000115548,ENSG00000133392,ENSG00000136478,ENSG00000167460,ENSG00000116514,ENSG00000086991,ENSG00000111490,ENSG00000136040,ENSG00000103196,ENSG00000115109,ENSG00000099139,ENSG00000106141,ENSG00000142970,ENSG00000076256</p> |

|                    |                                 |     |             |            |                                                                                                                                                                                                                                                                                                                                                                                                                                                                                                                                                                                                                                                                                                                                                                                                                                                                                                                                                                                                                                                                                                                                                                                                                                                                                                                                                                                                                                                                                                                                                                                                                                                                                                                                                                                                                                                                                                                                                                                                                                                                                                                                                                                                                                                                                                                                                                                                                                                                                                                                                                                                                                                                                                                                                                                                                                                                                                                                                                                                                                                                                                                                                                                                                                                                                                                                                                                                                                                                           |
|--------------------|---------------------------------|-----|-------------|------------|---------------------------------------------------------------------------------------------------------------------------------------------------------------------------------------------------------------------------------------------------------------------------------------------------------------------------------------------------------------------------------------------------------------------------------------------------------------------------------------------------------------------------------------------------------------------------------------------------------------------------------------------------------------------------------------------------------------------------------------------------------------------------------------------------------------------------------------------------------------------------------------------------------------------------------------------------------------------------------------------------------------------------------------------------------------------------------------------------------------------------------------------------------------------------------------------------------------------------------------------------------------------------------------------------------------------------------------------------------------------------------------------------------------------------------------------------------------------------------------------------------------------------------------------------------------------------------------------------------------------------------------------------------------------------------------------------------------------------------------------------------------------------------------------------------------------------------------------------------------------------------------------------------------------------------------------------------------------------------------------------------------------------------------------------------------------------------------------------------------------------------------------------------------------------------------------------------------------------------------------------------------------------------------------------------------------------------------------------------------------------------------------------------------------------------------------------------------------------------------------------------------------------------------------------------------------------------------------------------------------------------------------------------------------------------------------------------------------------------------------------------------------------------------------------------------------------------------------------------------------------------------------------------------------------------------------------------------------------------------------------------------------------------------------------------------------------------------------------------------------------------------------------------------------------------------------------------------------------------------------------------------------------------------------------------------------------------------------------------------------------------------------------------------------------------------------------------------------------|
| cellular_component | cell                            | 190 | 87.55760369 | GO:0005623 | <p> ENSG00000160094,ENSG00000139514,ENSG00000105329,ENSG00000198879,ENSG000000033807,ENSG00000160087,ENSG000000090861,ENSG00000148498,ENSG00000124571,ENSG00000151693,ENSG00000147251,ENSG000000067057,ENSG000000067955,ENSG00000111269,ENSG00000124164,ENSG00000116833,ENSG00000090376,ENSG00000129515,ENSG00000135525,ENSG00000157483,ENSG00000112394,ENSG00000156011,ENSG00000235568,ENSG00000171105,ENSG00000106070,ENSG00000118961,ENSG00000138674,ENSG00000073803,ENSG00000138434,ENSG00000038382,ENSG00000169180,ENSG00000174238,ENSG0000005844,ENSG00000157107,ENSG00000162482,ENSG00000197102,ENSG00000154930,ENSG00000159692,ENSG00000143797,ENSG00000138119,ENSG0000000115221,ENSG00000166501,ENSG00000129566,ENSG00000124942,ENSG00000072954,ENSG00000186635,ENSG00000169851,ENSG00000138640,ENSG00000128849,ENSG00000175497,ENSG00000116350,ENSG00000169862,ENSG00000110075,ENSG00000101187,ENSG00000159128,ENSG00000173575,ENSG00000213892,ENSG00000175899,ENSG00000071537,ENSG00000127152,ENSG00000180530,ENSG00000141298,ENSG00000176390,ENSG00000197256,ENSG00000167601,ENSG00000077044,ENSG00000114439,ENSG00000164430,ENSG00000148935,ENSG00000140575,ENSG00000169896,ENSG00000154310,ENSG00000031003,ENSG00000129116,ENSG00000105556,ENSG00000171517,ENSG00000145819,ENSG00000167004,ENSG00000079841,ENSG00000198604,ENSG00000091542,ENSG00000172765,ENSG00000131236,ENSG00000136048,ENSG00000164073,ENSG00000124813,ENSG00000143811,ENSG00000138798,ENSG00000181826,ENSG00000102189,ENSG000000008294,ENSG00000134369,ENSG00000181031,ENSG00000135090,ENSG00000130529,ENSG000001188158,ENSG00000168389,ENSG00000106571,ENSG00000146555,ENSG00000100068,ENSG00000159216,ENSG0000013364,ENSG00000164292,ENSG00000169398,ENSG00000124126,ENSG00000099282,ENSG00000196526,ENSG00000143768,ENSG00000213639,ENSG00000130956,ENSG00000050748,ENSG00000100077,ENSG00000119686,ENSG00000130429,ENSG00000077782,ENSG00000216490,ENSG00000131873,ENSG00000138709,ENSG00000177463,ENSG00000072657,ENSG00000148516,ENSG00000095139,ENSG00000124788,ENSG00000197442,ENSG00000143376,ENSG00000163947,ENSG00000170927,ENSG00000110925,ENSG00000105176,ENSG00000198380,ENSG00000119314,ENSG00000198162,ENSG00000100116,ENSG00000080493,ENSG00000134909,ENSG00000155660,ENSG00000111087,ENSG00000150938,ENSG00000107957,ENSG00000110693,ENSG00000144426,ENSG00000025796,ENSG00000184640,ENSG00000058091,ENSG00000156886,ENSG00000136237,ENSG0000000110880,ENSG00000169946,ENSG00000110395,ENSG00000169359,ENSG00000057019,ENSG00000064666,ENSG00000168487,ENSG00000080603,ENSG00000048052,ENSG00000066468,ENSG00000153721,ENSG00000114554,ENSG00000118322,ENSG00000130208,ENSG00000124006,ENSG00000139540,ENSG00000100099,ENSG00000134815,ENSG00000135052,ENSG00000086991,ENSG00000111490,ENSG00000136040,ENSG00000103196,ENSG00000115109,ENSG00000099139,ENSG00000196141,ENSG00000143970,ENSG00000076356,ENSG00000133392,ENSG00000115548,ENSG00000136478,ENSG00000167460,ENSG000000116514,ENSG000001100485,ENSG00000104671,ENSG00000054611,ENSG00000173068,ENSG00000169902,ENSG00000105419,ENSG00000106049,ENSG00000157399,ENSG00000173040,ENSG00000152317,ENSG00000105701 </p>                                                                                                                                                                                                                                                                                        |
| cellular_component | cellular_component              | 210 | 96.77419355 | GO:0005575 | <p> ENSG00000219073,ENSG00000129566,ENSG00000115221,ENSG00000138119,ENSG000001166501,ENSG00000159692,ENSG00000143797,ENSG00000157107,ENSG00000162482,ENSG00000197102,ENSG00000154930,ENSG00000174238,ENSG0000005844,ENSG00000138434,ENSG00000038382,ENSG00000169180,ENSG00000118961,ENSG00000106070,ENSG00000073803,ENSG00000138674,ENSG00000156011,ENSG00000112394,ENSG00000235568,ENSG00000171105,ENSG00000243480,ENSG00000129515,ENSG00000157483,ENSG00000135525,ENSG00000124164,ENSG00000116833,ENSG00000090376,ENSG00000147251,ENSG00000067057,ENSG00000067955,ENSG00000111269,ENSG00000124571,ENSG00000148498,ENSG00000187021,ENSG00000151693,ENSG00000160087,ENSG00000198879,ENSG00000033867,ENSG00000090861,ENSG00000105329,ENSG00000139514,ENSG00000160094,ENSG00000106771,ENSG00000146433,ENSG000000181826,ENSG00000143811,ENSG00000138798,ENSG00000174939,ENSG00000198604,ENSG00000091542,ENSG00000091704,ENSG00000172765,ENSG00000136048,ENSG00000131236,ENSG00000164073,ENSG00000124813,ENSG00000145819,ENSG00000167004,ENSG00000079841,ENSG00000105556,ENSG00000171517,ENSG00000129116,ENSG00000169896,ENSG00000154310,ENSG00000031003,ENSG00000153002,ENSG00000164430,ENSG00000114439,ENSG00000148935,ENSG00000140575,ENSG00000167601,ENSG00000077044,ENSG00000141298,ENSG00000176390,ENSG00000197256,ENSG00000140470,ENSG00000071537,ENSG00000127152,ENSG00000180530,ENSG00000240038,ENSG00000175899,ENSG00000173575,ENSG00000213892,ENSG00000101187,ENSG00000159128,ENSG00000169862,ENSG00000110075,ENSG00000124942,ENSG00000072954,ENSG00000186635,ENSG00000169851,ENSG00000128849,ENSG00000138640,ENSG00000175497,ENSG00000116350,ENSG00000142615,ENSG00000198162,ENSG00000100116,ENSG00000198380,ENSG00000119314,ENSG00000110925,ENSG00000075223,ENSG00000105176,ENSG00000163947,ENSG00000197442,ENSG00000143376,ENSG00000170927,ENSG00000177463,ENSG00000072657,ENSG00000148516,ENSG00000124788,ENSG00000095139,ENSG00000130429,ENSG00000216490,ENSG00000131873,ENSG00000138709,ENSG00000119686,ENSG00000050748,ENSG00000130956,ENSG00000100077,ENSG00000099282,ENSG00000143768,ENSG00000213639,ENSG00000169398,ENSG00000164292,ENSG00000124126,ENSG00000152078,ENSG00000100068,ENSG00000159216,ENSG0000013364,ENSG00000146555,ENSG00000106571,ENSG00000175535,ENSG00000215704,ENSG00000135090,ENSG00000130529,ENSG000001188158,ENSG00000168389,ENSG0000008294,ENSG00000142789,ENSG00000134369,ENSG00000181031,ENSG00000102189,ENSG00000153317,ENSG00000105701,ENSG00000106049,ENSG00000157399,ENSG00000173040,ENSG00000105419,ENSG000001100485,ENSG00000104671,ENSG00000054611,ENSG00000173068,ENSG00000169902,ENSG00000167460,ENSG00000116514,ENSG00000133392,ENSG00000136478,ENSG00000115548,ENSG00000077942,ENSG00000196141,ENSG00000143970,ENSG00000076356,ENSG00000111490,ENSG00000086991,ENSG00000136040,ENSG00000115109,ENSG00000103196,ENSG00000099139,ENSG00000139540,ENSG00000124006,ENSG00000100099,ENSG00000134815,ENSG00000135052,ENSG00000048052,ENSG00000066468,ENSG00000114554,ENSG00000153721,ENSG00000118322,ENSG00000130208,ENSG00000080603,ENSG00000057019,ENSG00000168487,ENSG00000080603,ENSG00000169946,ENSG00000110880,ENSG00000110395,ENSG00000169359,ENSG00000025796,ENSG00000184640,ENSG00000058091,ENSG00000156886,ENSG00000136237,ENSG00000103534,ENSG00000107957,ENSG00000110693,ENSG00000100731,ENSG00000144426,ENSG00000134909,ENSG00000075420,ENSG00000155660,ENSG00000150938,ENSG00000111087,ENSG00000080493 </p> |
| biological_process | regulation of metabolic process | 100 | 46.08294931 | GO:0019222 | <p> ENSG00000156011,ENSG00000130956,ENSG00000050748,ENSG00000235568,ENSG00000171105,ENSG00000073803,ENSG00000038382,ENSG00000077782,ENSG00000216490,ENSG00000177463,ENSG00000148516,ENSG00000124788,ENSG00000197442,ENSG00000163947,ENSG00000170927,ENSG00000110925,ENSG00000159692,ENSG00000105176,ENSG00000198380,ENSG00000119314,ENSG00000166501,ENSG00000160094,ENSG0000008294,ENSG00000135090,ENSG00000105329,ENSG00000198879,ENSG00000106571,ENSG00000175535,ENSG00000124571,ENSG00000151693,ENSG00000067955,ENSG00000159216,ENSG00000111269,ENSG0000013364,ENSG00000169398,ENSG00000116833,ENSG00000124164,ENSG00000124126,ENSG00000090376,ENSG00000129515,ENSG00000213639,ENSG00000143768,ENSG00000086991,ENSG00000114439,ENSG00000115109,ENSG00000140575,ENSG00000077942,ENSG00000154310,ENSG00000143970,ENSG00000031003,ENSG00000115548,ENSG00000105556,ENSG00000116514,ENSG00000171517,ENSG00000100485,ENSG00000145819,ENSG00000173068,ENSG00000079841,ENSG00000198604,ENSG00000131236,ENSG00000136048,ENSG00000124813,ENSG00000138798,ENSG00000105701,ENSG00000124942,ENSG00000138640,ENSG00000186635,ENSG00000116350,ENSG00000134909,ENSG00000169862,ENSG00000150938,ENSG00000110075,ENSG00000111087,ENSG00000107957,ENSG00000110693,ENSG00000173575,ENSG00000136237,ENSG00000169946,ENSG00000110880,ENSG00000169359,ENSG00000110395,ENSG00000175899,ENSG00000064666,ENSG00000168487,ENSG00000071537,ENSG00000127152,ENSG00000080603,ENSG00000180530,ENSG00000066468,ENSG00000048052,ENSG00000176390,ENSG00000197256,ENSG00000153721,ENSG00000130208,ENSG00000139540,ENSG00000100099,ENSG00000134815,ENSG00000135052 </p>                                                                                                                                                                                                                                                                                                                                                                                                                                                                                                                                                                                                                                                                                                                                                                                                                                                                                                                                                                                                                                                                                                                                                                                                                                                                                                                                                                                                                                                                                                                                                                                                                                                                                                                                                                                                                                    |

|                    |                                 |     |             |            |                                                                                                                                                                                                                                                                                                                                                                                                                                                                                                                                                                                                                                                                                                                                                                                                                                                                                                                                                                                                                                                                                                                                                                                                                                                                                                                                                                                                                                                                                                                                                                                                                                                                                                                                                                                                                                                                                                                                                                                                                                                                                                                                                                                                                                                                                                                                                                                                                                                                                                                                                                                                                                                                                                                                                                                                                                                                                                                                                                                                                                                                                                                                                                                                                                                                                                                                                                                                                                                                                                                                                                              |
|--------------------|---------------------------------|-----|-------------|------------|------------------------------------------------------------------------------------------------------------------------------------------------------------------------------------------------------------------------------------------------------------------------------------------------------------------------------------------------------------------------------------------------------------------------------------------------------------------------------------------------------------------------------------------------------------------------------------------------------------------------------------------------------------------------------------------------------------------------------------------------------------------------------------------------------------------------------------------------------------------------------------------------------------------------------------------------------------------------------------------------------------------------------------------------------------------------------------------------------------------------------------------------------------------------------------------------------------------------------------------------------------------------------------------------------------------------------------------------------------------------------------------------------------------------------------------------------------------------------------------------------------------------------------------------------------------------------------------------------------------------------------------------------------------------------------------------------------------------------------------------------------------------------------------------------------------------------------------------------------------------------------------------------------------------------------------------------------------------------------------------------------------------------------------------------------------------------------------------------------------------------------------------------------------------------------------------------------------------------------------------------------------------------------------------------------------------------------------------------------------------------------------------------------------------------------------------------------------------------------------------------------------------------------------------------------------------------------------------------------------------------------------------------------------------------------------------------------------------------------------------------------------------------------------------------------------------------------------------------------------------------------------------------------------------------------------------------------------------------------------------------------------------------------------------------------------------------------------------------------------------------------------------------------------------------------------------------------------------------------------------------------------------------------------------------------------------------------------------------------------------------------------------------------------------------------------------------------------------------------------------------------------------------------------------------------------------------|
| biological_process | cellular response to stimulus   | 106 | 48.84792627 | GO:0051716 | ENSG00000105701,ENSG00000173040,ENSG00000138798,ENSG00000143811,ENSG00000103419,ENSG00000124813,ENSG00000131230,ENSG00000145819,ENSG00000100485,ENSG00000167004,ENSG00000171517,ENSG00000115548,ENSG00000136478,ENSG00000154310,ENSG00000143970,ENSG00000169896,ENSG00000077942,ENSG00000076356,ENSG00000031003,ENSG00000136040,ENSG00000086991,ENSG00000140575,ENSG00000115109,ENSG00000164430,ENSG00000167601,ENSG00000139540,ENSG00000077044,ENSG00000176390,ENSG00000048052,ENSG00000066468,ENSG00000153721,ENSG00000197256,ENSG00000114554,ENSG00000071537,ENSG00000168487,ENSG00000127152,ENSG00000057019,ENSG00000064666,ENSG00000180530,ENSG00000169359,ENSG00000110395,ENSG00000110880,ENSG00000175899,ENSG00000156886,ENSG00000058091,ENSG00000136237,ENSG00000173575,ENSG00000110693,ENSG00000115912,ENSG00000134909,ENSG00000169862,ENSG00000155660,ENSG00000150938,ENSG00000111087,ENSG00000138640,ENSG00000186635,ENSG00000138119,ENSG00000115221,ENSG00000166501,ENSG00000075223,ENSG00000105176,ENSG00000170927,ENSG00000197442,ENSG00000163947,ENSG00000143376,ENSG00000162482,ENSG00000072657,ENSG00000177463,ENSG00000005844,ENSG00000148516,ENSG00000130429,ENSG00000038382,ENSG00000131873,ENSG00000216490,ENSG00000077782,ENSG00000073803,ENSG00000106070,ENSG00000235568,ENSG00000156011,ENSG00000130956,ENSG00000050748,ENSG00000171105,ENSG00000100077,ENSG00000196526,ENSG00000099282,ENSG00000157483,ENSG00000143768,ENSG00000129515,ENSG00000124164,ENSG00000116833,ENSG00000124126,ENSG00000169398,ENSG00000164292,ENSG00000090376,ENSG00000100068,ENSG00000147251,ENSG0000013364,ENSG00000111269,ENSG00000148498,ENSG00000106571,ENSG00000090861,ENSG00000135090,ENSG00000105329,ENSG00000130529,ENSG00000008294,ENSG00000181031,ENSG00000173575,ENSG00000058091,ENSG00000110693,ENSG00000111087,ENSG00000155660,ENSG00000169862,ENSG00000175497,ENSG00000116350,ENSG00000142615,ENSG00000124942,ENSG00000186635,ENSG00000134815,ENSG00000139540,ENSG00000167601,ENSG00000100099,ENSG00000197256,ENSG00000153721,ENSG00000130208,ENSG00000066468,ENSG00000048052,ENSG00000141298,ENSG00000176390,ENSG00000080603,ENSG00000180530,ENSG00000064666,ENSG00000140470,ENSG00000168487,ENSG00000071537,ENSG00000127152,ENSG00000175899,ENSG00000169946,ENSG00000110880,ENSG00000169359,ENSG00000110395,ENSG00000116514,ENSG00000171517,ENSG00000105556,ENSG00000115548,ENSG00000077942,ENSG00000143970,ENSG00000154310,ENSG00000115109,ENSG00000153002,ENSG00000114439,ENSG00000099139,ENSG00000140575,ENSG00000086991,ENSG00000105701,ENSG00000157399,ENSG00000138798,ENSG00000091704,ENSG00000124813,ENSG00000174939,ENSG00000091542,ENSG00000198604,ENSG00000173068,ENSG00000167004,ENSG00000079841,ENSG00000169902,ENSG00000090861,ENSG00000215704,ENSG00000198879,ENSG00000160087,ENSG00000106571,ENSG00000130529,ENSG00000105329,ENSG00000135090,ENSG00000142789,ENSG0000008294,ENSG00000160094,ENSG00000129515,ENSG00000143768,ENSG00000213639,ENSG00000099282,ENSG00000090376,ENSG00000169398,ENSG00000116833,ENSG00000124164,ENSG00000111269,ENSG00000159216,ENSG0000013364,ENSG00000067955,ENSG00000148498,ENSG00000124571,ENSG00000148516,ENSG00000124788,ENSG00000177463,ENSG00000072657,ENSG00000216490,ENSG00000077782,ENSG00000131873,ENSG00000038382,ENSG00000073803,ENSG00000171105,ENSG00000100077,ENSG00000130956,ENSG00000050748,ENSG00000235568,ENSG00000129566,ENSG00000219073,ENSG00000198162,ENSG00000119314,ENSG00000166501,ENSG00000198380,ENSG00000105176,ENSG00000110925,ENSG00000159692,ENSG00000197442,ENSG00000170927 |
| biological_process | macromolecule metabolic process | 109 | 50.23041475 | GO:0043170 | ENSG00000186635,ENSG00000138640,ENSG00000116350,ENSG00000134909,ENSG00000169862,ENSG00000150938,ENSG00000155660,ENSG00000111087,ENSG00000110693,ENSG00000159128,ENSG00000058091,ENSG00000156886,ENSG00000173575,ENSG00000136237,ENSG00000110880,ENSG00000169946,ENSG00000110395,ENSG00000169359,ENSG00000175899,ENSG00000057019,ENSG00000064666,ENSG00000071537,ENSG00000168487,ENSG00000127152,ENSG00000180530,ENSG00000048052,ENSG00000066468,ENSG00000176390,ENSG00000197256,ENSG00000153721,ENSG00000114554,ENSG00000167601,ENSG00000139540,ENSG00000100099,ENSG00000077044,ENSG00000086991,ENSG00000136040,ENSG00000164430,ENSG00000115109,ENSG00000140575,ENSG00000169896,ENSG00000077942,ENSG00000154310,ENSG00000143970,ENSG00000031003,ENSG00000076356,ENSG00000136478,ENSG00000115548,ENSG00000111269,ENSG00000171517,ENSG00000100485,ENSG00000145819,ENSG00000079841,ENSG00000167004,ENSG00000169902,ENSG00000091542,ENSG0000013123,ENSG00000124813,ENSG00000105419,ENSG00000143811,ENSG00000138798,ENSG00000173040,ENSG00000105701,ENSG0000008294,ENSG00000181031,ENSG00000105329,ENSG00000135090,ENSG00000130529,ENSG00000160087,ENSG00000106571,ENSG00000090861,ENSG00000148498,ENSG00000146555,ENSG00000147251,ENSG00000100068,ENSG00000111269,ENSG0000003364,ENSG00000169398,ENSG00000164292,ENSG00000124126,ENSG00000124164,ENSG00000116833,ENSG00000090376,ENSG00000099282,ENSG00000196526,ENSG00000129515,ENSG00000157483,ENSG00000213639,ENSG00000135525,ENSG00000143768,ENSG00000156011,ENSG00000050748,ENSG00000130956,ENSG00000235568,ENSG00000171105,ENSG00000100077,ENSG00000106070,ENSG00000073803,ENSG00000138674,ENSG00000038382,ENSG00000130429,ENSG00000216490,ENSG00000077782,ENSG00000131873,ENSG00000177463,ENSG00000072657,ENSG00000148516,ENSG00000005844,ENSG00000095139,ENSG000000197442,ENSG00000163947,ENSG00000162482,ENSG00000143376,ENSG00000170927,ENSG00000075223,ENSG00000266200,ENSG00000105176,ENSG00000138119,ENSG00000115221,ENSG00000166501                                                                                                                                                                                                                                                                                                                                                                                                                                                                                                                                                                                                                                                                                                                                                                                                                                                                                                                                                                                                                                                                                                                                                                                                                                                                                                                                                                                                                                                                                                                                                                                |
| biological_process | response to stimulus            | 120 | 55.29953917 | GO:0050896 | ENSG00000198162,ENSG00000129566,ENSG00000100116,ENSG00000198380,ENSG00000166501,ENSG00000119314,ENSG00000143797,ENSG00000110925,ENSG00000159692,ENSG00000105176,ENSG00000170927,ENSG00000154930,ENSG00000197442,ENSG00000162482,ENSG00000163947,ENSG00000072657,ENSG00000177463,ENSG00000124788,ENSG00000148516,ENSG00000038382,ENSG00000077782,ENSG00000131873,ENSG00000073803,ENSG00000106070,ENSG00000235568,ENSG00000156011,ENSG00000130956,ENSG00000050748,ENSG00000171105,ENSG00000100077,ENSG00000213639,ENSG00000143768,ENSG00000129515,ENSG00000124164,ENSG00000124126,ENSG00000116833,ENSG00000169398,ENSG00000067955,ENSG00000090376,ENSG00000067955,ENSG00000067057,ENSG0000013364,ENSG00000111269,ENSG00000159216,ENSG00000148498,ENSG00000151693,ENSG00000106571,ENSG00000198879,ENSG00000160087,ENSG00000175497,ENSG00000090861,ENSG00000135090,ENSG00000105329,ENSG00000130529,ENSG0000008294,ENSG00000170835,ENSG00000160094,ENSG00000105701,ENSG00000106049,ENSG00000138798,ENSG00000157399,ENSG00000143811,ENSG00000198604,ENSG00000091542,ENSG00000174939,ENSG00000124813,ENSG00000131236,ENSG00000136048,ENSG00000145819,ENSG00000100485,ENSG00000169902,ENSG00000167004,ENSG00000173068,ENSG00000105556,ENSG00000171517,ENSG00000116514,ENSG00000115548,ENSG00000136478,ENSG00000154310,ENSG00000143970,ENSG00000077942,ENSG00000031003,ENSG00000086991,ENSG00000099139,ENSG00000140575,ENSG00000164430,ENSG00000167601,ENSG00000139540,ENSG00000176390,ENSG00000048052,ENSG00000141298,ENSG00000066468,ENSG00000130208,ENSG00000197256,ENSG00000153721,ENSG00000168487,ENSG00000071537,ENSG00000127152,ENSG00000180530,ENSG00000080603,ENSG00000110395,ENSG00000169359,ENSG00000110880,ENSG00000169946,ENSG00000175899,ENSG00000136237,ENSG00000173575,ENSG00000110693,ENSG00000107957,ENSG00000169862,ENSG00000134909,ENSG00000155660,ENSG00000110075,ENSG00000111087,ENSG00000186635,ENSG00000138640,ENSG00000124942,ENSG00000116350                                                                                                                                                                                                                                                                                                                                                                                                                                                                                                                                                                                                                                                                                                                                                                                                                                                                                                                                                                                                                                                                                                                                                                                                                                                                                                                                                                                                                                                                                                                                                                                                                |
| biological_process | cellular metabolic process      | 121 | 55.76036866 | GO:0044237 | ENSG00000198162,ENSG00000129566,ENSG00000100116,ENSG00000198380,ENSG00000166501,ENSG00000119314,ENSG00000143797,ENSG00000110925,ENSG00000159692,ENSG00000105176,ENSG00000170927,ENSG00000154930,ENSG00000197442,ENSG00000162482,ENSG00000163947,ENSG00000072657,ENSG00000177463,ENSG00000124788,ENSG00000148516,ENSG00000038382,ENSG00000077782,ENSG00000131873,ENSG00000073803,ENSG00000106070,ENSG00000235568,ENSG00000156011,ENSG00000130956,ENSG00000050748,ENSG00000171105,ENSG00000100077,ENSG00000213639,ENSG00000143768,ENSG00000129515,ENSG00000124164,ENSG00000124126,ENSG00000116833,ENSG00000169398,ENSG00000067955,ENSG00000090376,ENSG00000067955,ENSG00000067057,ENSG0000013364,ENSG00000111269,ENSG00000159216,ENSG00000148498,ENSG00000151693,ENSG00000106571,ENSG00000198879,ENSG00000160087,ENSG00000175497,ENSG00000090861,ENSG00000135090,ENSG00000105329,ENSG00000130529,ENSG0000008294,ENSG00000170835,ENSG00000160094,ENSG00000105701,ENSG00000106049,ENSG00000138798,ENSG00000157399,ENSG00000143811,ENSG00000198604,ENSG00000091542,ENSG00000174939,ENSG00000124813,ENSG00000131236,ENSG00000136048,ENSG00000145819,ENSG00000100485,ENSG00000169902,ENSG00000167004,ENSG00000173068,ENSG00000105556,ENSG00000171517,ENSG00000116514,ENSG00000115548,ENSG00000136478,ENSG00000154310,ENSG00000143970,ENSG00000077942,ENSG00000031003,ENSG00000086991,ENSG00000099139,ENSG00000140575,ENSG00000164430,ENSG00000167601,ENSG00000139540,ENSG00000176390,ENSG00000048052,ENSG00000141298,ENSG00000066468,ENSG00000130208,ENSG00000197256,ENSG00000153721,ENSG00000168487,ENSG00000071537,ENSG00000127152,ENSG00000180530,ENSG00000080603,ENSG00000110395,ENSG00000169359,ENSG00000110880,ENSG00000169946,ENSG00000175899,ENSG00000136237,ENSG00000173575,ENSG00000110693,ENSG00000107957,ENSG00000169862,ENSG00000134909,ENSG00000155660,ENSG00000110075,ENSG00000111087,ENSG00000186635,ENSG00000138640,ENSG00000124942,ENSG00000116350                                                                                                                                                                                                                                                                                                                                                                                                                                                                                                                                                                                                                                                                                                                                                                                                                                                                                                                                                                                                                                                                                                                                                                                                                                                                                                                                                                                                                                                                                                                                                                                                                |

|                    |                                     |     |             |            |                                                                                                                                                                                                                                                                                                                                                                                                                                                                                                                                                                                                                                                                                                                                                                                                                                                                                                                                                                                                                                                                                                                                                                                                                                                                                                                                                                                                                                                                                                                                                                                                                                                                                                                                                                                                                                                                                                                                                                                                                                                                                                                                                                                                                                                                                                                                                                                                                             |
|--------------------|-------------------------------------|-----|-------------|------------|-----------------------------------------------------------------------------------------------------------------------------------------------------------------------------------------------------------------------------------------------------------------------------------------------------------------------------------------------------------------------------------------------------------------------------------------------------------------------------------------------------------------------------------------------------------------------------------------------------------------------------------------------------------------------------------------------------------------------------------------------------------------------------------------------------------------------------------------------------------------------------------------------------------------------------------------------------------------------------------------------------------------------------------------------------------------------------------------------------------------------------------------------------------------------------------------------------------------------------------------------------------------------------------------------------------------------------------------------------------------------------------------------------------------------------------------------------------------------------------------------------------------------------------------------------------------------------------------------------------------------------------------------------------------------------------------------------------------------------------------------------------------------------------------------------------------------------------------------------------------------------------------------------------------------------------------------------------------------------------------------------------------------------------------------------------------------------------------------------------------------------------------------------------------------------------------------------------------------------------------------------------------------------------------------------------------------------------------------------------------------------------------------------------------------------|
| biological_process | primary metabolic process           | 130 | 59.9078341  | GO:0044238 | ENSG000001198162,ENSG000001100116,ENSG000001198380,ENSG00000119314,ENSG00000110925,ENSG000001105176,ENSG000001170927,ENSG000001163947,ENSG000001197442,ENSG000000072657,ENSG000001177463,ENSG000001124788,ENSG000001148516,ENSG000001131873,ENSG000000077782,ENSG000000050748,ENSG000001130956,ENSG000001100077,ENSG000000099282,ENSG00000213639,ENSG000001143768,ENSG000001124126,ENSG000001169398,ENSG000000013364,ENSG0000159216,ENSG000001106571,ENSG00000215704,ENSG000001175535,ENSG000001135090,ENSG000001130529,ENSG00000008294,ENSG000001142789,ENSG000001170835,ENSG000001105701,ENSG000001106049,ENSG000001157399,ENSG000001100485,ENSG000001169902,ENSG000001173068,ENSG000001116514,ENSG000001136478,ENSG000001115548,ENSG000001143970,ENSG000000077942,ENSG000000086991,ENSG000000099139,ENSG000001139540,ENSG000001135052,ENSG000001134815,ENSG000000066468,ENSG000000048052,ENSG000001153721,ENSG000001130208,ENSG000001168487,ENSG000000080603,ENSG000001110395,ENSG000001106935,ENSG000001169946,ENSG000001110880,ENSG000000058091,ENSG000001136237,ENSG000001110693,ENSG000001134909,ENSG000001111087,ENSG000001155660,ENSG00000219073,ENSG000001129566,ENSG000001166501,ENSG000001143797,ENSG000001159692,ENSG000001154930,ENSG000001174238,ENSG000000038382,ENSG00000073803,ENSG000001118961,ENSG00000235568,ENSG000001156011,ENSG000001171105,ENSG000001129515,ENSG00000243480,ENSG000001124164,ENSG00000116833,ENSG000000090376,ENSG000000067955,ENSG00000111269,ENSG000001148498,ENSG000001151693,ENSG000001187021,ENSG000001198879,ENSG00000160087,ENSG000000090861,ENSG000001105329,ENSG000001160094,ENSG000001138798,ENSG000001143811,ENSG000000091542,ENSG000001198604,ENSG000001174939,ENSG000001124813,ENSG000000091704,ENSG000001131236,ENSG000001145819,ENSG000001167004,ENSG000001105556,ENSG000001171517,ENSG000001154310,ENSG000000031003,ENSG000001140575,ENSG000001164430,ENSG000001153002,ENSG000001114439,ENSG000001167601,ENSG000000077044,ENSG000001176390,ENSG000001141298,ENSG000001197256,ENSG000000071537,ENSG000001127152,ENSG000001140470,ENSG000001180530,ENSG000001175899,ENSG00000240038,ENSG000001173575,ENSG000001169862,ENSG000001186635,ENSG000001138640,ENSG000001124942,ENSG000001142615,ENSG00000116350,ENSG000001175497                                                                                                                                           |
| biological_process | regulation of cellular process      | 136 | 62.67281106 | GO:0050794 | ENSG000001173040,ENSG000001105701,ENSG000001153317,ENSG000001173068,ENSG000000054611,ENSG000001100485,ENSG000001105419,ENSG00000115548,ENSG000001136478,ENSG000001116514,ENSG000001115109,ENSG000001136040,ENSG000000086991,ENSG000001111490,ENSG000000076356,ENSG000001143970,ENSG000000077942,ENSG000001130208,ENSG000001153721,ENSG000001114554,ENSG000000066468,ENSG000000048052,ENSG000001124006,ENSG0000000139540,ENSG000001169359,ENSG000001110395,ENSG000001110880,ENSG000001169946,ENSG000000080603,ENSG000001168487,ENSG000000064666,ENSG000000057019,ENSG000001110693,ENSG000001136237,ENSG000001156886,ENSG000000058091,ENSG000001155660,ENSG000001111087,ENSG000001150938,ENSG000001134909,ENSG000001119314,ENSG000001170927,ENSG000001197442,ENSG000001163947,ENSG000001143376,ENSG000001105176,ENSG000000075223,ENSG000001110925,ENSG00000216490,ENSG000001131873,ENSG000000077782,ENSG000001130429,ENSG000001124788,ENSG000001148516,ENSG000000072657,ENSG000001177463,ENSG000001100077,ENSG000001130956,ENSG000000050748,ENSG000001124126,ENSG000001164292,ENSG000001169398,ENSG000001143768,ENSG00000213639,ENSG000001196526,ENSG000000099282,ENSG000001146555,ENSG00000113364,ENSG000001159216,ENSG000001100068,ENSG000001130529,ENSG000001135090,ENSG000001106571,ENSG000001181031,ENSG00000008294,ENSG000001138798,ENSG000000079841,ENSG000001167004,ENSG000001145819,ENSG000001124813,ENSG000001136048,ENSG000001131236,ENSG000001198604,ENSG000001171517,ENSG000001105556,ENSG000001140575,ENSG000001148935,ENSG000001114439,ENSG000000031003,ENSG000001154310,ENSG000001169896,ENSG000001197256,ENSG000001176390,ENSG000001141298,ENSG000000077044,ENSG000001167601,ENSG000001175899,ENSG000001180530,ENSG000000071537,ENSG000001127152,ENSG000001159128,ENSG000001173575,ENSG000001175497,ENSG00000116350,ENSG000001186635,ENSG000001124942,ENSG000001110075,ENSG000001169862,ENSG000001166501,ENSG000001138119,ENSG00000115221,ENSG000001159692,ENSG000000038382,ENSG00000005844,ENSG000001171105,ENSG00000235568,ENSG000001156011,ENSG000000073803,ENSG000001106070,ENSG000000090376,ENSG000001124164,ENSG00000116833,ENSG000001157483,ENSG000001129515,ENSG000001151693,ENSG000001124571,ENSG000001148498,ENSG00000111269,ENSG000000067955,ENSG000001147251,ENSG000001105329,ENSG000000090861,ENSG000001198879,ENSG000001160094                                                                 |
| biological_process | organic substance metabolic process | 138 | 63.59447005 | GO:0071704 | ENSG000001159692,ENSG000001143797,ENSG000001162482,ENSG000001154930,ENSG00000219073,ENSG000001129566,ENSG000001166501,ENSG000001118961,ENSG000000073803,ENSG000001156011,ENSG00000235568,ENSG000001171105,ENSG000001174238,ENSG000000038382,ENSG000000067057,ENSG000000067955,ENSG00000111269,ENSG000001124571,ENSG000001148498,ENSG000001187021,ENSG000001151693,ENSG000001129515,ENSG00000243480,ENSG000001124164,ENSG00000116833,ENSG000000090376,ENSG000001160094,ENSG000001198879,ENSG000001160087,ENSG000000090861,ENSG000001105329,ENSG000001174939,ENSG000001198604,ENSG000000091542,ENSG000001131236,ENSG000000091704,ENSG000001124813,ENSG000001145819,ENSG000000079841,ENSG000001167004,ENSG000001143811,ENSG000001138798,ENSG000001154310,ENSG000000031003,ENSG000001164430,ENSG000001153002,ENSG000001114439,ENSG000001140575,ENSG000001105556,ENSG000001171517,ENSG000001140470,ENSG000001127152,ENSG000000071537,ENSG000001180530,ENSG000001175899,ENSG00000240038,ENSG000001167601,ENSG000000077044,ENSG000001141298,ENSG000001176390,ENSG000001197256,ENSG000001169862,ENSG000001124942,ENSG000001138640,ENSG000001186635,ENSG000001175497,ENSG00000116350,ENSG000001142615,ENSG000001173575,ENSG00000110925,ENSG000001105176,ENSG000001163947,ENSG000001197442,ENSG000001170927,ENSG000001198162,ENSG000001100116,ENSG000001198380,ENSG00000119314,ENSG000001130956,ENSG000000050748,ENSG000001100077,ENSG000001177463,ENSG000000072657,ENSG000001148516,ENSG000001124788,ENSG00000216490,ENSG000001131873,ENSG000000077782,ENSG000001159216,ENSG000000013364,ENSG000000099282,ENSG000001143768,ENSG00000213639,ENSG000001169398,ENSG000001124126,ENSG00000008294,ENSG000001142789,ENSG000001170835,ENSG000001106571,ENSG000001175535,ENSG00000215704,ENSG000001135090,ENSG000001130529,ENSG000001100485,ENSG000001173068,ENSG000001169902,ENSG000001105701,ENSG000001106049,ENSG000001157399,ENSG000000077942,ENSG000001143970,ENSG000000086991,ENSG00000115109,ENSG000000099139,ENSG000001116514,ENSG000001115548,ENSG000001136478,ENSG000000064666,ENSG000001168487,ENSG000000080603,ENSG000001169946,ENSG000001110880,ENSG000001169359,ENSG000001110395,ENSG000001139540,ENSG000001100099,ENSG000001134815,ENSG000001135052,ENSG000000066468,ENSG000000048052,ENSG000001153721,ENSG000001130208,ENSG000001134909,ENSG000001155660,ENSG000001111087,ENSG000000058091,ENSG000001136237,ENSG000001110693 |



|                    |                                  |     |             |            |                                                                                                                                                                                                                                                                                                                                                                                                                                                                                                                                                                                                                                                                                                                                                                                                                                                                                                                                                                                                                                                                                                                                                                                                                                                                                                                                                                                                                                                                                                                                                                                                                                                                                                                                                                                                                                                                                                                                                                                                                                                                                                                                                                                                                                                                                                                                                                                                                                                                                  |
|--------------------|----------------------------------|-----|-------------|------------|----------------------------------------------------------------------------------------------------------------------------------------------------------------------------------------------------------------------------------------------------------------------------------------------------------------------------------------------------------------------------------------------------------------------------------------------------------------------------------------------------------------------------------------------------------------------------------------------------------------------------------------------------------------------------------------------------------------------------------------------------------------------------------------------------------------------------------------------------------------------------------------------------------------------------------------------------------------------------------------------------------------------------------------------------------------------------------------------------------------------------------------------------------------------------------------------------------------------------------------------------------------------------------------------------------------------------------------------------------------------------------------------------------------------------------------------------------------------------------------------------------------------------------------------------------------------------------------------------------------------------------------------------------------------------------------------------------------------------------------------------------------------------------------------------------------------------------------------------------------------------------------------------------------------------------------------------------------------------------------------------------------------------------------------------------------------------------------------------------------------------------------------------------------------------------------------------------------------------------------------------------------------------------------------------------------------------------------------------------------------------------------------------------------------------------------------------------------------------------|
| biological_process | regulation of biological process | 143 | 65.89861751 | GO:0050789 | ENSG00000159692,ENSG00000115221,ENSG00000138119,ENSG00000166501,ENSG00000073803,ENSG00000106070,ENSG00000235568,ENSG00000156011,ENSG00000171105,ENSG00000005844,ENSG00000038382,ENSG00000067955,ENSG00000147251,ENSG00000111269,ENSG00000124571,ENSG00000148498,ENSG00000151693,ENSG00000157483,ENSG00000129515,ENSG00000124164,ENSG00000116833,ENSG00000090376,ENSG00000160094,ENSG00000198879,ENSG00000090861,ENSG00000105329,ENSG00000198604,ENSG00000091542,ENSG00000124813,ENSG00000131236,ENSG00000136048,ENSG00000145819,ENSG00000167004,ENSG00000079841,ENSG00000138798,ENSG00000154310,ENSG00000169896,ENSG00000031003,ENSG00000140575,ENSG00000164430,ENSG00000148935,ENSG00000114439,ENSG00000105556,ENSG00000171517,ENSG00000071537,ENSG00000127152,ENSG00000180530,ENSG00000175899,ENSG00000167601,ENSG00000077044,ENSG00000176390,ENSG00000141298,ENSG00000197256,ENSG00000169862,ENSG00000110075,ENSG00000186635,ENSG00000138640,ENSG00000124942,ENSG00000116350,ENSG00000175497,ENSG00000173575,ENSG00000159128,ENSG00000075223,ENSG00000110925,ENSG00000105176,ENSG00000170927,ENSG00000143376,ENSG00000197442,ENSG00000163947,ENSG00000198380,ENSG00000119314,ENSG00000130956,ENSG00000050748,ENSG00000100077,ENSG00000072657,ENSG00000177463,ENSG00000124788,ENSG00000148516,ENSG00000130429,ENSG00000077782,ENSG00000216490,ENSG00000131873,ENSG00000100068,ENSG00000013364,ENSG00000159216,ENSG00000146555,ENSG00000196526,ENSG00000099282,ENSG00000143768,ENSG00000213639,ENSG00000124126,ENSG00000164292,ENSG00000169398,ENSG00000008294,ENSG00000181031,ENSG00000106571,ENSG00000175535,ENSG00000135090,ENSG00000130529,ENSG00000105419,ENSG00000100485,ENSG00000054611,ENSG00000173068,ENSG00000153317,ENSG00000105701,ENSG00000173040,ENSG00000143970,ENSG00000077942,ENSG00000076356,ENSG00000136040,ENSG00000111490,ENSG00000086991,ENSG00000115109,ENSG00000116514,ENSG00000115548,ENSG00000136478,ENSG00000168487,ENSG00000064666,ENSG00000057019,ENSG00000080603,ENSG00000169359,ENSG00000110395,ENSG00000169946,ENSG00000110880,ENSG00000100099,ENSG00000139540,ENSG00000124006,ENSG00000135052,ENSG00000134815,ENSG00000048052,ENSG00000066468,ENSG00000153721,ENSG00000114554,ENSG00000130208,ENSG00000134909,ENSG00000155660,ENSG00000111087,ENSG00000150938,ENSG00000156886,ENSG00000058091,ENSG00000136237,ENSG00000110693,ENSG00000107957                                                                                                  |
| biological_process | metabolic process                | 146 | 67.28110599 | GO:0008152 | ENSG00000105329,ENSG00000160087,ENSG00000198879,ENSG00000090861,ENSG00000160094,ENSG00000124164,ENSG00000116833,ENSG00000090376,ENSG00000157483,ENSG00000243480,ENSG00000129515,ENSG00000124571,ENSG00000148498,ENSG00000151693,ENSG00000187021,ENSG00000067955,ENSG00000067057,ENSG00000111269,ENSG00000038382,ENSG00000174238,ENSG00000235568,ENSG00000156011,ENSG00000171105,ENSG00000173803,ENSG00000106070,ENSG00000118961,ENSG00000166501,ENSG00000219073,ENSG00000129566,ENSG00000154930,ENSG00000162482,ENSG00000143797,ENSG00000159692,ENSG00000173575,ENSG00000138640,ENSG00000186635,ENSG00000124942,ENSG00000142615,ENSG00000175497,ENSG00000116350,ENSG00000169862,ENSG00000110075,ENSG00000176390,ENSG00000141298,ENSG00000197256,ENSG000001167601,ENSG00000077044,ENSG00000175899,ENSG00000240038,ENSG00000127152,ENSG00000071537,ENSG00000140470,ENSG00000180530,ENSG00000105556,ENSG00000171517,ENSG00000140575,ENSG00000153002,ENSG00000164430,ENSG00000114439,ENSG00000154310,ENSG00000031003,ENSG00000138798,ENSG00000143811,ENSG00000145819,ENSG00000079841,ENSG00000167004,ENSG00000091542,ENSG00000198604,ENSG00000174939,ENSG00000124813,ENSG00000131236,ENSG00000136048,ENSG00000091704,ENSG00000135090,ENSG00000130529,ENSG00000106571,ENSG00000175535,ENSG00000215704,ENSG00000170835,ENSG0000008294,ENSG00000142789,ENSG00000124126,ENSG00000169398,ENSG00000099282,ENSG00000213639,ENSG00000143768,ENSG00000013364,ENSG00000159216,ENSG00000131873,ENSG00000216490,ENSG00000077782,ENSG00000072657,ENSG00000177463,ENSG00000124788,ENSG00000148516,ENSG00000130956,ENSG00000050748,ENSG00000100077,ENSG00000258539,ENSG00000198380,ENSG00000119314,ENSG00000198162,ENSG00000100116,ENSG00000170927,ENSG00000163947,ENSG00000197442,ENSG00000110925,ENSG00000105176,ENSG00000110693,ENSG00000107957,ENSG00000058091,ENSG0000025796,ENSG00000136237,ENSG00000134909,ENSG00000111087,ENSG00000150938,ENSG00000155660,ENSG00000048052,ENSG00000066468,ENSG00000153721,ENSG00000130208,ENSG00000100099,ENSG00000139540,ENSG00000135052,ENSG00000134815,ENSG00000169359,ENSG00000110395,ENSG00000169946,ENSG00000110880,ENSG00000168487,ENSG00000064666,ENSG00000080603,ENSG00000115548,ENSG00000136478,ENSG00000116514,ENSG00000086991,ENSG00000099139,ENSG00000115109,ENSG00000143970,ENSG00000077942,ENSG00000106049,ENSG00000157399,ENSG00000105701,ENSG00000100485,ENSG00000169902,ENSG00000173068                                                   |
| biological_process | biological regulation            | 150 | 69.12442396 | GO:0065007 | ENSG00000181031,ENSG00000008294,ENSG00000130529,ENSG00000135090,ENSG00000175535,ENSG00000106571,ENSG00000146555,ENSG00000159216,ENSG00000013364,ENSG00000100068,ENSG00000169398,ENSG00000164292,ENSG00000124126,ENSG00000143768,ENSG00000213639,ENSG00000099282,ENSG00000196526,ENSG00000100077,ENSG00000130956,ENSG00000050748,ENSG00000077782,ENSG00000216490,ENSG00000131873,ENSG00000130429,ENSG00000148516,ENSG00000124788,ENSG00000177463,ENSG00000072657,ENSG00000197442,ENSG00000163947,ENSG00000143376,ENSG00000170927,ENSG00000105176,ENSG00000075223,ENSG00000110925,ENSG00000119314,ENSG00000198380,ENSG00000080493,ENSG00000115560,ENSG00000111087,ENSG00000150938,ENSG00000134909,ENSG00000107957,ENSG00000110693,ENSG00000136237,ENSG00000058091,ENSG00000156886,ENSG00000110880,ENSG0000016946,ENSG00000169359,ENSG00000110395,ENSG00000080603,ENSG00000057019,ENSG00000064666,ENSG00000168487,ENSG00000118322,ENSG00000114554,ENSG00000130208,ENSG00000153721,ENSG00000066468,ENSG00000048052,ENSG00000134815,ENSG00000135052,ENSG00000139540,ENSG00000124006,ENSG00000100099,ENSG00000115109,ENSG00000099139,ENSG00000086991,ENSG00000111490,ENSG00000136040,ENSG00000076356,ENSG00000077942,ENSG00000143970,ENSG00000115548,ENSG00000136478,ENSG00000116514,ENSG00000054611,ENSG00000173068,ENSG00000100485,ENSG00000105419,ENSG00000173040,ENSG00000105701,ENSG00000153317,ENSG00000105329,ENSG0000010090861,ENSG00000198879,ENSG00000033867,ENSG00000151693,ENSG00000148498,ENSG00000124571,ENSG00000111269,ENSG00000147251,ENSG00000067955,ENSG00000090376,ENSG00000116833,ENSG00000124164,ENSG00000129515,ENSG00000157483,ENSG00000171105,ENSG00000156011,ENSG00000112394,ENSG00000235568,ENSG00000106070,ENSG00000073803,ENSG00000038382,ENSG00000005844,ENSG00000159692,ENSG00000166501,ENSG00000115221,ENSG00000138119,ENSG00000129566,ENSG00000116350,ENSG00000175497,ENSG00000124942,ENSG00000138640,ENSG00000186635,ENSG00000110075,ENSG00000169862,ENSG00000101187,ENSG00000159128,ENSG00000173575,ENSG00000175899,ENSG00000180530,ENSG00000127152,ENSG00000071537,ENSG00000197256,ENSG00000141298,ENSG00000176390,ENSG00000077044,ENSG00000167601,ENSG00000164430,ENSG00000148935,ENSG00000114439,ENSG00000140575,ENSG00000031003,ENSG00000169896,ENSG00000154310,ENSG00000171517,ENSG00000105556,ENSG00000167004,ENSG00000079841,ENSG00000145819,ENSG00000131236,ENSG00000136048,ENSG00000214813,ENSG00000198604,ENSG00000091542,ENSG00000138798 |

|                    |                                     |     |             |            |                                                                                                                                                                                                                                                                                                                                                                                                                                                                                                                                                                                                                                                                                                                                                                                                                                                                                                                                                                                                                                                                                                                                                                                                                                                                                                                                                                                                                                                                                                                                                                                                                                                                                                                                                                                                                                                                                                                                                                                                                                                                                                                                                                                                                                                                                                                                                                                                                                                                                                                                                                                                                                                                                                                                                                                                                                                                                                                                   |
|--------------------|-------------------------------------|-----|-------------|------------|-----------------------------------------------------------------------------------------------------------------------------------------------------------------------------------------------------------------------------------------------------------------------------------------------------------------------------------------------------------------------------------------------------------------------------------------------------------------------------------------------------------------------------------------------------------------------------------------------------------------------------------------------------------------------------------------------------------------------------------------------------------------------------------------------------------------------------------------------------------------------------------------------------------------------------------------------------------------------------------------------------------------------------------------------------------------------------------------------------------------------------------------------------------------------------------------------------------------------------------------------------------------------------------------------------------------------------------------------------------------------------------------------------------------------------------------------------------------------------------------------------------------------------------------------------------------------------------------------------------------------------------------------------------------------------------------------------------------------------------------------------------------------------------------------------------------------------------------------------------------------------------------------------------------------------------------------------------------------------------------------------------------------------------------------------------------------------------------------------------------------------------------------------------------------------------------------------------------------------------------------------------------------------------------------------------------------------------------------------------------------------------------------------------------------------------------------------------------------------------------------------------------------------------------------------------------------------------------------------------------------------------------------------------------------------------------------------------------------------------------------------------------------------------------------------------------------------------------------------------------------------------------------------------------------------------|
| biological_process | single-organism<br>cellular process | 161 | 74.19354839 | GO:0044763 | ENSG00000110075,ENSG00000169862,ENSG00000116350,ENSG00000175497,ENSG00000169851,ENSG00000186635,ENSG00000138640,ENSG00000072954,ENSG00000124942,ENSG00000173575,ENSG00000159128,ENSG00000180530,ENSG00000071537,ENSG00000127152,ENSG00000175899,ENSG00000077044,ENSG00000167601,ENSG00000197256,ENSG00000176390,ENSG00000141298,ENSG00000031003,ENSG00000154310,ENSG00000169896,ENSG00000140575,ENSG0000148935,ENSG00000164430,ENSG00000171517,ENSG00000129116,ENSG00000124813,ENSG00000164073,ENSG00000131236,ENSG00000136048,ENSG00000091542,ENSG00000198604,ENSG00000167004,ENSG00000079841,ENSG00000145819,ENSG00000138798,ENSG00000143811,ENSG00000090861,ENSG00000033867,ENSG00000105329,ENSG00000111269,ENSG000000067955,ENSG00000147251,ENSG00000148498,ENSG00000124571,ENSG00000157483,ENSG00000135525,ENSG00000129515,ENSG000000090376,ENSG00000116833,ENSG00000124164,ENSG00000138674,ENSG00000073803,ENSG00000106070,ENSG000001171105,ENSG00000235568,ENSG00000156011,ENSG00000112394,ENSG00000005844,ENSG00000169180,ENSG00000038382,ENSG00000159692,ENSG00000162482,ENSG00000197102,ENSG00000157107,ENSG00000129566,ENSG00000166501,ENSG00000115221,ENSG00000138119,ENSG00000150938,ENSG00000111087,ENSG00000155660,ENSG00000134909,ENSG000000080493,ENSG00000136237,ENSG00000156886,ENSG00000025796,ENSG00000184640,ENSG00000058091,ENSG00000110693,ENSG00000107957,ENSG000000080603,ENSG00000168487,ENSG00000057019,ENSG00000064666,ENSG00000169359,ENSG00000110395,ENSG00000100110880,ENSG00000169946,ENSG00000135052,ENSG00000100099,ENSG00000124006,ENSG00000139540,ENSG00000118322,ENSG00000153721,ENSG00000114554,ENSG000000066468,ENSG000000048052,ENSG00000076356,ENSG00000143970,ENSG00000077942,ENSG000000099139,ENSG00000103196,ENSG00000115109,ENSG00000136040,ENSG00000111490,ENSG000000086991,ENSG00000167460,ENSG00000136478,ENSG00000115548,ENSG00000133392,ENSG00000105419,ENSG00000054611,ENSG00000104671,ENSG00000100485,ENSG00000105701,ENSG00000153317,ENSG00000173040,ENSG00000181031,ENSG00000134369,ENSG00000008294,ENSG00000102189,ENSG00000106571,ENSG00000188158,ENSG00000168389,ENSG00000130529,ENSG00000135090,ENSG00000013364,ENSG00000159216,ENSG00000100068,ENSG00000146555,ENSG00000213639,ENSG00000143768,ENSG00000196526,ENSG00000099282,ENSG00000124126,ENSG00000164292,ENSG00000169398,ENSG00000119686,ENSG00000100077,ENSG00000050748,ENSG00000130956,ENSG00000095139,ENSG00000124788,ENSG00000148516,ENSG00000072657,ENSG00000177463,ENSG00000131873,ENSG00000216490,ENSG00000077782,ENSG00000130429,ENSG00000105176,ENSG00000110925,ENSG00000075223,ENSG00000170927,ENSG00000197442,ENSG00000163947,ENSG00000143376,ENSG00000119314                                                                                                                                                                                                                                        |
| biological_process | single-organism<br>process          | 177 | 81.56682028 | GO:0044699 | ENSG00000124164,ENSG00000116833,ENSG00000090376,ENSG00000157483,ENSG00000135525,ENSG00000243480,ENSG00000129515,ENSG00000124571,ENSG00000148498,ENSG00000067955,ENSG00000147251,ENSG00000111269,ENSG00000105329,ENSG00000033867,ENSG00000090861,ENSG00000139514,ENSG00000138119,ENSG00000115221,ENSG00000166501,ENSG00000129566,ENSG00000157107,ENSG00000162482,ENSG00000197102,ENSG00000159692,ENSG00000038382,ENSG00000169180,ENSG00000174238,ENSG00000005844,ENSG00000235568,ENSG00000156011,ENSG00000112394,ENSG000001171105,ENSG00000073803,ENSG00000138674,ENSG00000106070,ENSG00000176390,ENSG00000141298,ENSG00000197256,ENSG00000167601,ENSG00000077044,ENSG00000240038,ENSG00000175899,ENSG00000127152,ENSG00000071537,ENSG00000180530,ENSG00000159128,ENSG00000173575,ENSG000000213892,ENSG00000186635,ENSG00000169851,ENSG00000138640,ENSG00000072954,ENSG00000124942,ENSG00000116350,ENSG00000175497,ENSG00000169862,ENSG00000110075,ENSG00000138798,ENSG00000143811,ENSG00000145819,ENSG00000079841,ENSG00000167004,ENSG00000091542,ENSG00000198604,ENSG00000124813,ENSG00000164073,ENSG00000131236,ENSG00000136048,ENSG00000129116,ENSG00000171517,ENSG00000140575,ENSG00000148935,ENSG00000164430,ENSG00000114439,ENSG00000154310,ENSG00000169896,ENSG00000031003,ENSG00000124126,ENSG00000164292,ENSG00000169398,ENSG00000196526,ENSG00000099282,ENSG00000213639,ENSG00000143768,ENSG00000146555,ENSG00000100068,ENSG0000013364,ENSG00000159216,ENSG00000135090,ENSG00000168389,ENSG00000188158,ENSG00000130529,ENSG00000106571,ENSG00000175535,ENSG00000102189,ENSG00000008294,ENSG00000181031,ENSG00000142789,ENSG00000134369,ENSG00000198380,ENSG00000119314,ENSG00000198162,ENSG00000170927,ENSG00000197442,ENSG000000143376,ENSG00000163947,ENSG00000266200,ENSG00000110925,ENSG00000075223,ENSG00000105176,ENSG00000130429,ENSG00000131873,ENSG000000216490,ENSG00000077782,ENSG00000072657,ENSG00000177463,ENSG00000124788,ENSG00000095139,ENSG00000148516,ENSG00000130956,ENSG00000050748,ENSG00000100077,ENSG00000119686,ENSG00000066468,ENSG00000048052,ENSG00000130208,ENSG00000114554,ENSG00000153721,ENSG00000118322,ENSG00000100099,ENSG00000139540,ENSG00000124006,ENSG00000135052,ENSG00000169359,ENSG00000110395,ENSG00000110880,ENSG00000169946,ENSG00000168487,ENSG00000064666,ENSG00000057019,ENSG00000080603,ENSG00000110693,ENSG00000107957,ENSG00000156886,ENSG00000184640,ENSG0000025796,ENSG00000058091,ENSG00000103534,ENSG00000136237,ENSG00000080493,ENSG00000134909,ENSG00000111087,ENSG00000150938,ENSG00000155660,ENSG00000157399,ENSG00000173040,ENSG00000153317,ENSG00000105701,ENSG00000104671,ENSG00000100485,ENSG00000173068,ENSG00000054611,ENSG00000105419,ENSG00000133392,ENSG00000115548,ENSG00000136478,ENSG00000167460,ENSG00000136040,ENSG00000086991,ENSG00000111490,ENSG00000099139,ENSG00000103196,ENSG00000115109,ENSG00000143970,ENSG00000077942,ENSG00000076356 |

|                    |                    |     |             |            |                                                                                                                                                                                                                                                                                                                                                                                                                                                                                                                                                                                                                                                                                                                                                                                                                                                                                                                                                                                                                                                                                                                                                                                                                                                                                                                                                                                                                                                                                                                                                                                                                                                                                                                                                                                                                                                                                                                                                                                                                                                                                                                                                                                                                                                                                                                                                                                                                                                                                                                                                                                                                                                                                                                                                                                                                                                                                                                                                                                                                                                                                                                                                                                                                                                                                                                                                                                                          |
|--------------------|--------------------|-----|-------------|------------|----------------------------------------------------------------------------------------------------------------------------------------------------------------------------------------------------------------------------------------------------------------------------------------------------------------------------------------------------------------------------------------------------------------------------------------------------------------------------------------------------------------------------------------------------------------------------------------------------------------------------------------------------------------------------------------------------------------------------------------------------------------------------------------------------------------------------------------------------------------------------------------------------------------------------------------------------------------------------------------------------------------------------------------------------------------------------------------------------------------------------------------------------------------------------------------------------------------------------------------------------------------------------------------------------------------------------------------------------------------------------------------------------------------------------------------------------------------------------------------------------------------------------------------------------------------------------------------------------------------------------------------------------------------------------------------------------------------------------------------------------------------------------------------------------------------------------------------------------------------------------------------------------------------------------------------------------------------------------------------------------------------------------------------------------------------------------------------------------------------------------------------------------------------------------------------------------------------------------------------------------------------------------------------------------------------------------------------------------------------------------------------------------------------------------------------------------------------------------------------------------------------------------------------------------------------------------------------------------------------------------------------------------------------------------------------------------------------------------------------------------------------------------------------------------------------------------------------------------------------------------------------------------------------------------------------------------------------------------------------------------------------------------------------------------------------------------------------------------------------------------------------------------------------------------------------------------------------------------------------------------------------------------------------------------------------------------------------------------------------------------------------------------------|
| biological_process | cellular process   | 183 | 84.33179724 | GO:0009987 | <p>ENSG00000127152,ENSG00000071537,ENSG00000180530,ENSG00000175899,ENSG00000167601,ENSG00000077044,ENSG00000141298,ENSG00000176390,ENSG00000197256,ENSG00000169862,ENSG00000110075,ENSG00000124942,ENSG00000072954,ENSG00000186635,ENSG00000169851,ENSG00000138640,ENSG00000116350,ENSG00000175497,ENSG00000173575,ENSG00000159128,ENSG00000174939,ENSG00000198604,ENSG00000091542,ENSG00000136048,ENSG00000131236,ENSG00000164073,ENSG00000124813,ENSG00000145819,ENSG00000167004,ENSG00000079841,ENSG00000143811,ENSG00000138798,ENSG00000169896,ENSG00000154310,ENSG00000031003,ENSG00000148935,ENSG00000164430,ENSG00000114439,ENSG00000140575,ENSG00000105556,ENSG00000171517,ENSG00000129116,ENSG00000147251,ENSG00000067057,ENSG00000067955,ENSG00000111269,ENSG00000148498,ENSG00000124571,ENSG000000151693,ENSG00000129515,ENSG00000135525,ENSG00000157483,ENSG000001124164,ENSG00000116833,ENSG00000090376,ENSG00000160094,ENSG000000198879,ENSG00000033867,ENSG00000160087,ENSG00000090861,ENSG00000105329,ENSG00000159692,ENSG00000143797,ENSG00000157107,ENSG00000197102,ENSG00000162482,ENSG00000154930,ENSG00000129566,ENSG00000115221,ENSG00000138119,ENSG00000166501,ENSG00000106070,ENSG00000073803,ENSG00000138674,ENSG00000112394,ENSG00000156011,ENSG00000235568,ENSG00000171105,ENSG00000005844,ENSG00000038382,ENSG00000169180,ENSG0000064666,ENSG00000057019,ENSG00000168487,ENSG00000080603,ENSG00000169946,ENSG00000110880,ENSG00000169359,ENSG00000110395,ENSG00000124006,ENSG00000139540,ENSG00000100099,ENSG00000134815,ENSG00000135052,ENSG00000066468,ENSG00000048052,ENSG00000118322,ENSG00000114554,ENSG00000130208,ENSG00000153721,ENSG00000134909,ENSG00000111087,ENSG00000150938,ENSG00000155660,ENSG00000080493,ENSG000000184640,ENSG00000058091,ENSG00000025796,ENSG00000156886,ENSG00000136237,ENSG00000107957,ENSG00000110693,ENSG00000105419,ENSG00000100485,ENSG00000104671,ENSG00000173068,ENSG00000054611,ENSG00000169902,ENSG00000153317,ENSG00000105701,ENSG00000106049,ENSG00000173040,ENSG00000157399,ENSG00000077942,ENSG00000143970,ENSG00000076356,ENSG00000086991,ENSG00000111490,ENSG00000136040,ENSG00000115109,ENSG00000103196,ENSG00000099139,ENSG00000167460,ENSG00000116514,ENSG00000133392,ENSG00000136478,ENSG00000115548,ENSG00000100068,ENSG00000159216,ENSG00000013364,ENSG00000146555,ENSG00000099282,ENSG00000196526,ENSG00000143768,ENSG00000213639,ENSG00000169398,ENSG00000164292,ENSG00000124126,ENSG0000008294,ENSG00000134369,ENSG00000181031,ENSG00000170835,ENSG00000102189,ENSG00000106571,ENSG00000175535,ENSG00000135090,ENSG00000130529,ENSG00000168389,ENSG00000188158,ENSG00000075223,ENSG00000110925,ENSG00000105176,ENSG000000163947,ENSG00000197442,ENSG00000143376,ENSG00000170927,ENSG00000198162,ENSG00000100116,ENSG00000198380,ENSG00000119314,ENSG00000119686,ENSG00000130956,ENSG00000050748,ENSG00000100077,ENSG00000177463,ENSG00000072657,ENSG00000148516,ENSG00000095139,ENSG00000124788,ENSG00000130429,ENSG00000216490,ENSG00000131873,ENSG00000077782</p>                                                                                                                                                                                                                                                                                                                                                |
| biological_process | biological_process | 204 | 94.00921659 | GO:0008150 | <p>ENSG00000157107,ENSG00000162482,ENSG00000197102,ENSG00000154930,ENSG00000159692,ENSG00000143797,ENSG00000138119,ENSG00000118322,ENSG00000166501,ENSG00000219073,ENSG00000129566,ENSG00000112394,ENSG00000156011,ENSG00000235568,ENSG00000171105,ENSG00000118961,ENSG00000106070,ENSG00000073803,ENSG00000138674,ENSG00000038382,ENSG00000169180,ENSG00000174238,ENSG00000005844,ENSG00000148498,ENSG00000124571,ENSG00000187021,ENSG00000151693,ENSG00000147251,ENSG00000067057,ENSG00000067955,ENSG00000111269,ENSG00000116833,ENSG000001024164,ENSG00000090376,ENSG00000129515,ENSG00000243480,ENSG00000135525,ENSG00000157483,ENSG00000160094,ENSG00000139514,ENSG000000105329,ENSG00000160087,ENSG00000198879,ENSG00000033867,ENSG00000090861,ENSG00000145819,ENSG00000167004,ENSG00000079841,ENSG000000174939,ENSG00000198604,ENSG00000091542,ENSG00000136048,ENSG00000131236,ENSG00000091704,ENSG00000164073,ENSG00000124813,ENSG00000143811,ENSG00000138798,ENSG00000146433,ENSG00000106771,ENSG00000148935,ENSG00000164430,ENSG00000153002,ENSG00000114439,ENSG00000140575,ENSG00000169896,ENSG00000154310,ENSG00000031003,ENSG00000129116,ENSG00000105556,ENSG00000171517,ENSG00000175899,ENSG00000240038,ENSG00000140470,ENSG00000127152,ENSG00000071537,ENSG00000180530,ENSG00000141298,ENSG00000176390,ENSG00000197256,ENSG00000167601,ENSG00000077044,ENSG00000072954,ENSG00000124942,ENSG00000186635,ENSG00000169851,ENSG00000138640,ENSG00000175497,ENSG00000116350,ENSG00000142615,ENSG00000169862,ENSG00000110075,ENSG00000159128,ENSG00000101187,ENSG00000173575,ENSG00000213892,ENSG00000197442,ENSG00000163947,ENSG00000143376,ENSG00000170927,ENSG00000110925,ENSG00000075223,ENSG00000266200,ENSG00000105176,ENSG00000198380,ENSG00000119314,ENSG00000198162,ENSG00000100116,ENSG00000130956,ENSG00000050748,ENSG00000100077,ENSG00000119686,ENSG00000258539,ENSG00000130429,ENSG00000131873,ENSG00000216490,ENSG00000077782,ENSG00000177463,ENSG00000072657,ENSG00000148516,ENSG00000095139,ENSG00000124788,ENSG00000146555,ENSG00000100068,ENSG00000159216,ENSG00000013364,ENSG00000169398,ENSG00000164292,ENSG00000124126,ENSG00000152078,ENSG00000099282,ENSG00000196526,ENSG00000213639,ENSG00000143768,ENSG00000170835,ENSG00000102189,ENSG0000008294,ENSG00000142789,ENSG00000134369,ENSG00000181031,ENSG00000135090,ENSG00000130529,ENSG00000188158,ENSG00000168389,ENSG00000106571,ENSG00000215704,ENSG00000175535,ENSG00000100485,ENSG00000104671,ENSG00000054611,ENSG00000173068,ENSG00000169902,ENSG00000105419,ENSG00000106049,ENSG00000157399,ENSG00000173040,ENSG00000153317,ENSG00000105701,ENSG00000111490,ENSG00000086991,ENSG00000136040,ENSG00000115109,ENSG00000103196,ENSG00000099139,ENSG00000077942,ENSG00000143970,ENSG00000076356,ENSG00000133392,ENSG00000136478,ENSG00000115548,ENSG00000167460,ENSG00000116514,ENSG00000110880,ENSG00000169946,ENSG00000169359,ENSG00000110395,ENSG00000064666,ENSG00000057019,ENSG00000168487,ENSG00000080603,ENSG00000066468,ENSG00000048052,ENSG00000153721,ENSG00000114554,ENSG00000118322,ENSG00000130208,ENSG00000139540,ENSG00000124006,ENSG00000100099,ENSG00000134815,ENSG00000135052,ENSG00000080493,ENSG00000134909,ENSG00000155660,ENSG00000150938,ENSG00000111087,ENSG00000107957,ENSG00000110693,ENSG00000184640,ENSG00000058091,ENSG00000025796,ENSG00000156886,ENSG00000103534,ENSG00000136237</p> |
|                    |                    |     |             |            |                                                                                                                                                                                                                                                                                                                                                                                                                                                                                                                                                                                                                                                                                                                                                                                                                                                                                                                                                                                                                                                                                                                                                                                                                                                                                                                                                                                                                                                                                                                                                                                                                                                                                                                                                                                                                                                                                                                                                                                                                                                                                                                                                                                                                                                                                                                                                                                                                                                                                                                                                                                                                                                                                                                                                                                                                                                                                                                                                                                                                                                                                                                                                                                                                                                                                                                                                                                                          |

|                                                                                                                                                                                                                                                                                                                                                                                                                                                                                                                                                                                                                                                                                                                                                                                                                                                                                                                                                                                                                                                                                                                                                                                                                                                                                                                                                                                                                                                                                                                                                                                                                                                                                                                                                                                                                                                                                                                                                                                                                                                                                                                                                                                                                                                                                                                                                                                                                                                                                                                                                                                                                                                                                                                                                                                                                                                                                                                                                                                                                                                                                                                                                                                                                                                                                                                                                                                                                                                                                                                                                                                                                |  |  |  |  |  |
|----------------------------------------------------------------------------------------------------------------------------------------------------------------------------------------------------------------------------------------------------------------------------------------------------------------------------------------------------------------------------------------------------------------------------------------------------------------------------------------------------------------------------------------------------------------------------------------------------------------------------------------------------------------------------------------------------------------------------------------------------------------------------------------------------------------------------------------------------------------------------------------------------------------------------------------------------------------------------------------------------------------------------------------------------------------------------------------------------------------------------------------------------------------------------------------------------------------------------------------------------------------------------------------------------------------------------------------------------------------------------------------------------------------------------------------------------------------------------------------------------------------------------------------------------------------------------------------------------------------------------------------------------------------------------------------------------------------------------------------------------------------------------------------------------------------------------------------------------------------------------------------------------------------------------------------------------------------------------------------------------------------------------------------------------------------------------------------------------------------------------------------------------------------------------------------------------------------------------------------------------------------------------------------------------------------------------------------------------------------------------------------------------------------------------------------------------------------------------------------------------------------------------------------------------------------------------------------------------------------------------------------------------------------------------------------------------------------------------------------------------------------------------------------------------------------------------------------------------------------------------------------------------------------------------------------------------------------------------------------------------------------------------------------------------------------------------------------------------------------------------------------------------------------------------------------------------------------------------------------------------------------------------------------------------------------------------------------------------------------------------------------------------------------------------------------------------------------------------------------------------------------------------------------------------------------------------------------------------------------|--|--|--|--|--|
| All the related genes (without duplicate)                                                                                                                                                                                                                                                                                                                                                                                                                                                                                                                                                                                                                                                                                                                                                                                                                                                                                                                                                                                                                                                                                                                                                                                                                                                                                                                                                                                                                                                                                                                                                                                                                                                                                                                                                                                                                                                                                                                                                                                                                                                                                                                                                                                                                                                                                                                                                                                                                                                                                                                                                                                                                                                                                                                                                                                                                                                                                                                                                                                                                                                                                                                                                                                                                                                                                                                                                                                                                                                                                                                                                                      |  |  |  |  |  |
| ENSG00000166501,ENSG00000129566,ENSG00000079841,ENSG00000197442,ENSG00000054611,ENSG00000110925,ENSG00000131236,ENSG00000038382,ENSG00000169180,ENSG00000116514,ENSG00000111490,ENSG00000140575,ENSG00000073803,ENSG00000124164,ENSG00000124126,ENSG00000164292,ENSG00000048052,ENSG00000169398,ENSG00000099282,ENSG00000213639,ENSG00000110395,ENSG00000124571,ENSG00000110880,ENSG00000148498,ENSG00000175899,ENSG00000147251,ENSG00000180530,ENSG00000013364,ENSG00000105329,ENSG00000106571,ENSG00000160087,ENSG00000008294,ENSG00000181031,ENSG00000110075,ENSG00000090861,ENSG00000173575,ENSG00000215704,ENSG00000175535,ENSG00000184640,ENSG00000142789,ENSG00000175497,ENSG00000142615,ENSG00000128849,ENSG00000134815,ENSG00000243480,ENSG00000157483,ENSG00000118322,ENSG00000141298,ENSG00000080603,ENSG00000140470,ENSG00000168487,ENSG00000187021,ENSG00000240038,ENSG00000072657,ENSG00000133392,ENSG00000118961,ENSG00000153002,ENSG00000099139,ENSG00000219073,ENSG00000198162,ENSG00000157399,ENSG00000091704,ENSG00000266200,ENSG00000197102,ENSG00000167004,ENSG00000116350,ENSG00000130529,ENSG00000135090,ENSG00000058091,ENSG00000159216,ENSG00000067057,ENSG00000090376,ENSG00000066468,ENSG00000077044,ENSG00000167601,ENSG00000171105,ENSG00000100077,ENSG00000164430,ENSG00000086991,ENSG00000154310,ENSG00000077782,ENSG00000154930,ENSG00000124813,ENSG00000159692,ENSG00000119314,ENSG00000106049,ENSG00000130208,ENSG00000177463,ENSG00000167460,ENSG00000005844,ENSG00000148516,ENSG00000115548,ENSG00000131873,ENSG00000143970,ENSG00000169896,ENSG00000077942,ENSG00000153317,ENSG00000105701,ENSG00000138798,ENSG00000198604,ENSG0000091542,ENSG00000173068,ENSG00000156886,ENSG00000111087,ENSG00000186635,ENSG00000169851,ENSG00000102189,ENSG00000160094,ENSG00000116833,ENSG00000127152,ENSG00000169946,ENSG00000151693,ENSG00000143376,ENSG00000145819,ENSG00000157107,ENSG00000138119,ENSG00000100116,ENSG00000103196,ENSG00000171517,ENSG00000129515,ENSG00000134909,ENSG00000144426,ENSG00000107957,ENSG00000111269,ENSG00000067955,ENSG00000110693,ENSG00000105419,ENSG00000100485,ENSG00000124788,ENSG00000105556,ENSG00000119686,ENSG00000114439,ENSG00000155660,ENSG00000150938,ENSG00000143811,ENSG00000169902,ENSG00000174939,ENSG00000198380,ENSG00000162482,ENSG00000143797,ENSG00000216490,ENSG00000121964,ENSG00000050748,ENSG00000258539,ENSG00000136048,ENSG00000148935,ENSG00000129116,ENSG00000071537,ENSG00000176390,ENSG00000197256,ENSG00000124942,ENSG00000169862,ENSG00000213892,ENSG00000115221,ENSG00000106070,ENSG00000138674,ENSG00000138434,ENSG00000135525,ENSG00000139514,ENSG00000198879,ENSG00000173040,ENSG00000136040,ENSG00000115109,ENSG00000076356,ENSG00000057019,ENSG00000064666,ENSG00000150477,ENSG00000114554,ENSG00000153721,ENSG00000124006,ENSG00000100099,ENSG00000135052,ENSG00000080493,ENSG00000179715,ENSG00000025796,ENSG00000136237,ENSG00000163947,ENSG00000170927,ENSG00000075223,ENSG00000105176,ENSG00000130956,ENSG00000130429,ENSG00000138709,ENSG00000146555,ENSG00000100068,ENSG00000196526,ENSG00000164483,ENSG00000143768,ENSG00000136478,ENSG00000174238,ENSG00000146433,ENSG00000152078,ENSG00000168389,ENSG00000139540,ENSG00000169359,ENSG00000033867,ENSG00000156011,ENSG00000112394,ENSG00000235568,ENSG00000159128,ENSG00000101187,ENSG00000072954,ENSG00000138640,ENSG00000106771,ENSG00000031003,ENSG00000095139,ENSG00000188158,ENSG00000172765,ENSG00000164073,ENSG00000181826,ENSG00000075420,ENSG00000100731,ENSG00000103534,ENSG00000134369,ENSG00000196141,ENSG00000104671,ENSG00000170835 |  |  |  |  |  |
|                                                                                                                                                                                                                                                                                                                                                                                                                                                                                                                                                                                                                                                                                                                                                                                                                                                                                                                                                                                                                                                                                                                                                                                                                                                                                                                                                                                                                                                                                                                                                                                                                                                                                                                                                                                                                                                                                                                                                                                                                                                                                                                                                                                                                                                                                                                                                                                                                                                                                                                                                                                                                                                                                                                                                                                                                                                                                                                                                                                                                                                                                                                                                                                                                                                                                                                                                                                                                                                                                                                                                                                                                |  |  |  |  |  |

**Circular RNA hsa\_circRNA\_0007334 is Predicted to Promote MMP7 and COL1A1 Expression by Functioning as miRNA Sponge in Pancreatic Ductal Adenocarcinoma**

Jinghui Yang<sup>1</sup>, Xianling Cong<sup>3</sup>, Ming Ren<sup>4</sup>, Hongyan Sun<sup>3</sup>, Tao Liu<sup>5</sup>, Gaoyang Chen<sup>4</sup>, Qingyu Wang<sup>4</sup>, Zhaoyan Li<sup>4</sup>, Shan Yu<sup>2\*</sup>, Qiwei Yang<sup>4,6\*</sup>

| CircRNA<br>Mirbase ID      | CircRNA (Top) - miRNA (Bottom) pairing | Site Type | CircRNA Start | CircRNA End | 3' pairing | local AU  | position  | TA        | SPS       | context+ score | context+ score percentile |
|----------------------------|----------------------------------------|-----------|---------------|-------------|------------|-----------|-----------|-----------|-----------|----------------|---------------------------|
| hsa-miR-1283 (3' ... 5')   | NNNNNNNNNGUCAACUUUGUAGU                | 7mer-m8   | 7             | 13          | too_close  | too_close | too_close | too_close | too_close | too_close      | NA                        |
| hsa-miR-1272 (3' ... 5')   | CCUACUGUAUCAUGAUCUCAUA                 | 8mer-1a   | 197           | 204         | 0.003      | 0.011     | -0.109    | -0.009    | 0.064     | -0.287         | 99                        |
| hsa-miR-1276 (3' ... 5')   | AUUCAAGCAAACUAGCUCUUUU                 | 7mer-m8   | 80            | 86          | 0.003      | -0.092    | -0.051    | 0.012     | 0.018     | -0.23          | 98                        |
| hsa-miR-621 (3' ... 5')    | GCCAACUCUUUGCCUUGCUAGCA                | 8mer-1a   | 32            | 39          | 0.013      | 0.031     | -0.106    | -0.073    | -0.073    | -0.455         | 98                        |
| hsa-miR-548p (3' ... 5')   | CUUUUACUUGCACUUUUUUGCUU                | 7mer-m8   | 133           | 139         | -0.016     | -0.042    | -0.05     | 0.03      | 0.058     | -0.14          | 97                        |
| hsa-miR-330-3p (3' ... 5') | UAUCUUGCACUUUUUUGCUUUGG                | 7mer-m8   | 136           | 142         | -0.007     | -0.056    | -0.05     | 0.02      | 0.023     | -0.19          | 96                        |
| hsa-miR-604 (3' ... 5')    | CUCUUUGCCUUGCUAGCAGCCAU                | 7mer-1a   | 37            | 43          | -0.002     | -0.006    | -0.046    | -0.002    | -0.104    | -0.234         | 95                        |
| hsa-miR-647 (3' ... 5')    | CUCUUUGCCUUGCUAGCAGCCAU                | 7mer-m8   | 37            | 43          | 0.012      | -0.056    | -0.057    | 0.01      | -0.084    | -0.295         | 95                        |
| hsa-miR-433 (3' ... 5')    | GGAAUUUCCUACUGUAUCAUGAU                | 7mer-m8   | 190           | 196         | 0.03       | -0.035    | -0.058    | 0.002     | 0.043     | -0.138         | 94                        |
| hsa-miR-571 (3' ... 5')    | CAACUUUGUAGUGGCCAACUCU                 | 7mer-m8   | 18            | 24          | 0.003      | 0.003     | -0.059    | -0.013    | -0.018    | -0.204         | 94                        |
| hsa-miR-144 (3' ... 5')    | CAAAGUGGAAUUUCCUACUGUAU                | 7mer-1a   | 184           | 190         | 0.001      | -0.008    | -0.046    | 0.013     | 0.015     | -0.099         | 92                        |
| hsa-miR-577 (3' ... 5')    | CAUUUGGUUUCGAACUUAUCUAC                | 7mer-1a   | 57            | 63          | 0.004      | -0.005    | -0.044    | 0.015     | 0.066     | -0.038         | 92                        |
| hsa-miR-577 (3' ... 5')    | CUACCCUUUUGGGCCUUUAUCUU                | 7mer-m8   | 119           | 125         | 0.003      | 0.055     | -0.048    | 0.015     | 0.095     | 0              | 87                        |
| hsa-miR-515-5p (3' ... 5') | UGAUCAUCAUAGGAGUGGAGAAC                | 7mer-1a   | 209           | 215         | 0.008      | 0.005     | -0.049    | 0.023     | -0.034    | -0.121         | 86                        |
| hsa-miR-1322 (3' ... 5')   | CUACUGUAUCAUGAUCAUCAUAG                | 7mer-1a   | 198           | 204         | -0.009     | 0.014     | -0.048    | -0.016    | 0.033     | -0.1           | 84                        |

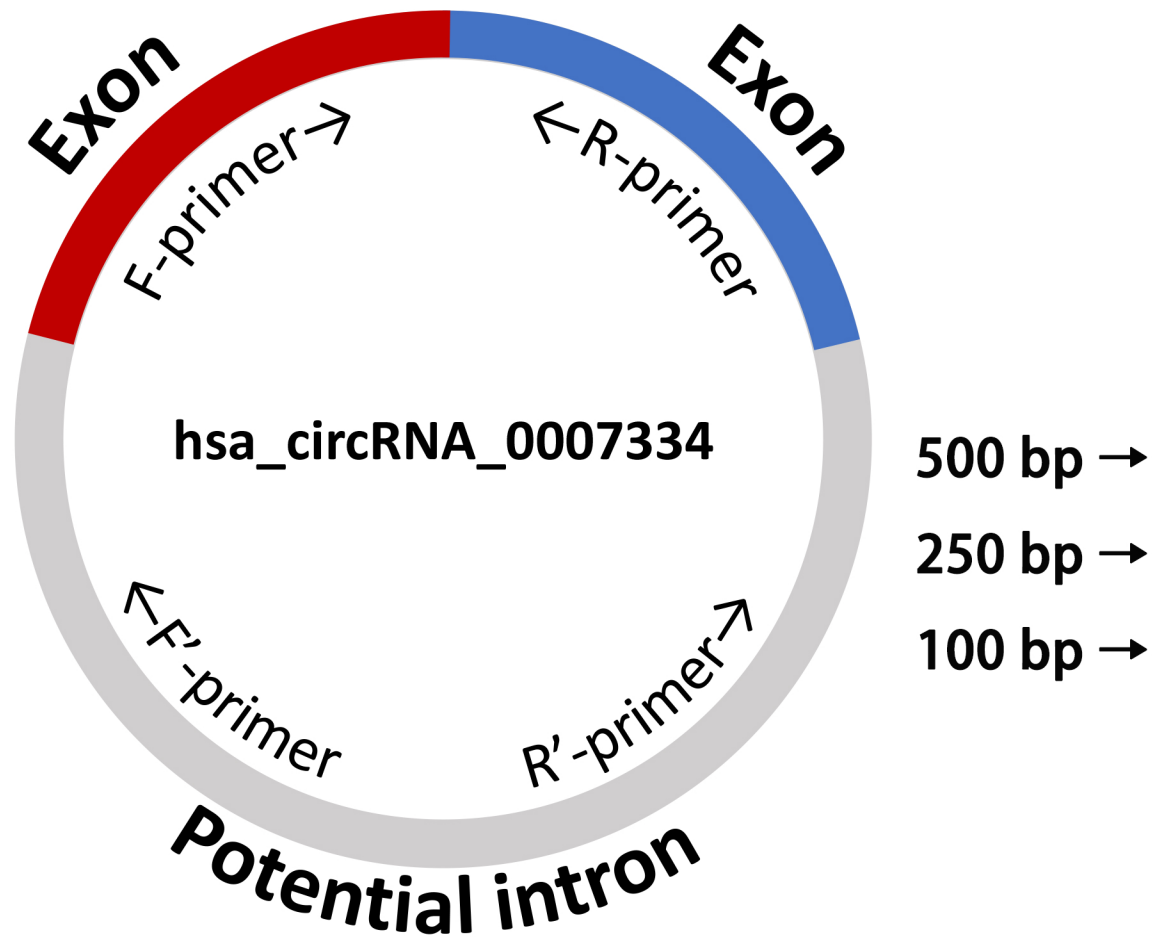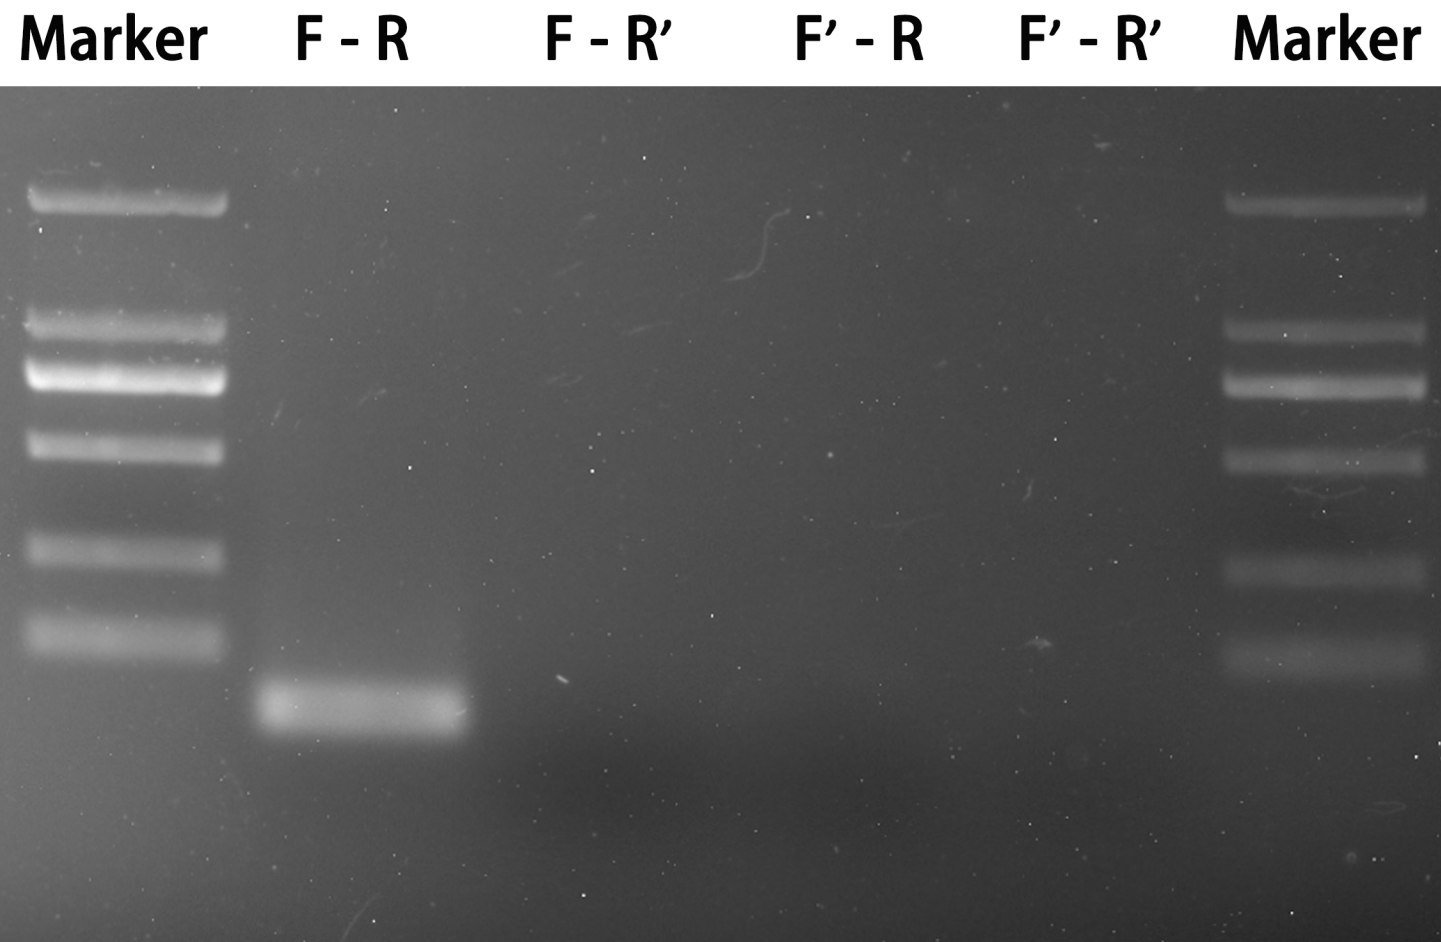

Supplement: f1 [file 7630894.f1.pdf]
